# Supplementary material
Source: PubMed Central journal article supplement (PMC2621330)

---

# Expedient Synthesis of *syn*- $\beta$ -Hydroxy- $\alpha$ -amino acid derivatives: Phenylalanine, Tyrosine, Histidine and Tryptophan.

---

David Crich\* and Abhisek Banerjee

*Department of Chemistry, University of Illinois at Chicago, 845 West Taylor Street,  
Chicago, Illinois 60607-7061*

## Table of Contents

| Compound                                                                                                                           | Expt | Spectra       |
|------------------------------------------------------------------------------------------------------------------------------------|------|---------------|
| <i>N,N</i> -di- <i>tert</i> -Butoxycarbonyl-L-phenylalanine methyl ester ( <b>2</b> )                                              | S-3  | S-7,<br>S-8   |
| (2 <i>R</i> ,3 <i>R</i> )-3-Bromo- <i>N,N</i> -di- <i>tert</i> -butoxycarbonyl-L-phenylalanine methyl ester ( <b>3</b> )           | S-3  | S-9,<br>S-10  |
| Methyl (4 <i>S</i> ,5 <i>R</i> )-3- <i>N-tert</i> -butoxycarbonyl-5-phenyl-1,3-oxazolidin-2-oxo-4-carboxylate ( <b>4</b> )         | -    | S-11,<br>S-12 |
| Methyl (4 <i>S</i> ,5 <i>S</i> )-3- <i>N-tert</i> -butoxycarbonyl-5-phenyl-1,3-oxazolidin-2-oxo-4-carboxylate ( <b>5</b> )         | -    | S-13,<br>S-14 |
| <i>N-tert</i> -Butoxycarbonyl-(2 <i>S</i> ,3 <i>R</i> )- $\beta$ -hydroxy-L-phenylalanine methyl ester ( <b>6</b> )                | -    | S-15,<br>S-16 |
| <i>N-tert</i> -Butoxycarbonyl-(2 <i>S</i> ,3 <i>R</i> )- $\beta$ -hydroxy-L-phenylalanine methyl-D <sub>3</sub> ester ( <b>7</b> ) | S-3  | S-17,<br>S-18 |
| <i>N-tert</i> -Butoxycarbonyl-(2 <i>S</i> ,3 <i>S</i> )- $\beta$ -hydroxy-L-phenylalanine methyl ester ( <b>8</b> )                | S-4  | S-19,<br>S-20 |
| Methyl (4 <i>S</i> ,5 <i>R</i> )-5-phenyl-1,3-oxazolidin-2-oxo-4-carboxylate ( <b>9</b> )                                          | S-4  | S-21,<br>S-22 |
| Methyl (4 <i>S</i> ,5 <i>S</i> )-5-phenyl-1,3-oxazolidin-2-oxo-4-carboxylate ( <b>10</b> )                                         | S-4  | S-23,<br>S-24 |
| <i>N,N</i> -di- <i>tert</i> -Butoxycarbonyl- <i>O-tert</i> -butoxycarbonyl-L-tyrosine methyl ester ( <b>12</b> )                   | S-5  | S-25,<br>S-26 |
| Methyl (4 <i>S</i> ,5 <i>R</i> )-3- <i>N-tert</i> -butoxycarbonyl-5-(4- <i>tert</i> -butoxycarbonyloxyphenyl)-1,3-                 | -    | S-27,         |

|                                                                                                                                                                                       |     |               |
|---------------------------------------------------------------------------------------------------------------------------------------------------------------------------------------|-----|---------------|
| oxazolidin-2-oxo-4-carboxylate ( <b>14</b> )                                                                                                                                          |     | S-28          |
| Methyl (4 <i>S</i> ,5 <i>S</i> )-3- <i>N</i> - <i>tert</i> -butoxycarbonyl-5-(4- <i>tert</i> -butoxycarbonyloxyphenyl)-1,3-oxazolidin-2-oxo-4-carboxylate ( <b>15</b> )               | -   | S-29,<br>S-30 |
| <i>N</i> - <i>tert</i> -Butoxycarbonyl- <i>O</i> - <i>tert</i> -butoxycarbonyl-(2 <i>S</i> ,3 <i>R</i> )- $\beta$ -hydroxy-L-tyrosine methyl ester ( <b>16</b> )                      | -   | S-31,<br>S-32 |
| <i>N,N</i> -di- <i>tert</i> -Butoxycarbonyl-4- <i>N</i> <sup>m</sup> - <i>tert</i> -butoxycarbonyl-L-hystidine methyl ester ( <b>18</b> )                                             | S-5 | S-33,<br>S-34 |
| Methyl (4 <i>S</i> ,5 <i>S</i> )-3- <i>N</i> - <i>tert</i> -butoxycarbonyl-5-{4- <i>N</i> -( <i>tert</i> -butoxycarbonyl)imidazolyl}-1,3-oxazolidin-2-oxo-4-carboxylate ( <b>20</b> ) | -   | S-35,<br>S-36 |
| Methyl (4 <i>S</i> ,5 <i>S</i> )-3- <i>N</i> - <i>tert</i> -butoxycarbonyl-5-imidazolyl-1,3-oxazolidin-2-oxo-4-carboxylate ( <b>21</b> )                                              | S-5 | S-37,<br>S-38 |
| <i>N</i> - <i>tert</i> -Butoxycarbonyl-2,3-didehydro-L-hystidine methyl ester ( <b>22</b> )                                                                                           | S-6 | S-39,<br>S-40 |
| <i>N</i> - <i>tert</i> -Butoxycarbonyl-4- <i>N</i> <sup>m</sup> -triphenylmethyl-(2 <i>S</i> ,3 <i>S</i> )- $\beta$ -hydroxy-L-hystidine methyl ester ( <b>23</b> )                   | -   | S-41,<br>S-42 |
| <i>N,N</i> -di- <i>tert</i> -Butoxycarbonyl- <i>N</i> <sup>n</sup> - <i>tert</i> -butoxycarbonyl-L-tryptophan methyl ester ( <b>25</b> )                                              | S-6 | S-43,<br>S-44 |
| Methyl (4 <i>S</i> ,5 <i>S</i> )-3- <i>N</i> - <i>tert</i> -butoxycarbonyl-5-{ <i>N</i> -( <i>tert</i> -butoxycarbonyl)indolyl}-1,3-oxazolidin-2-oxo-4-carboxylate ( <b>26</b> )      | -   | S-45,<br>S-46 |
| <i>N</i> - <i>tert</i> -Butoxycarbonyl- <i>N</i> <sup>n</sup> - <i>tert</i> -butoxycarbonyl-(2 <i>S</i> ,3 <i>S</i> )- $\beta$ -hydroxy-L-tryptophan methyl ester ( <b>27</b> )       | -   | S-47,<br>S-48 |
| References                                                                                                                                                                            | S-6 | -             |

**General.** Unless otherwise stated <sup>1</sup>H and <sup>13</sup>C NMR were recorded in CDCl<sub>3</sub> solution. Optical rotations were recorded in CHCl<sub>3</sub> solutions, unless otherwise stated. All organic extracts were dried over sodium sulfate, and concentrated under aspirator vacuum. Chromatographic purifications were carried out over silica gel.

### 1. General procedure for the synthesis of di-*N*-*tert*-butoxycarbonyl $\alpha$ -amino acids.<sup>1,2</sup>

To a suspension of  $\alpha$ -amino acid methyl ester hydrochloride in THF: water (2: 1), Na<sub>2</sub>CO<sub>3</sub> was added portion wise. At 0 °C, (Boc)<sub>2</sub>O (2 equiv.) was added and the reaction mixture was stirred at room temperature for 2 h. The organic layer was extracted with ethyl acetate and washed with saturated NH<sub>4</sub>Cl solution, water and brine. Then the organic layer was dried and concentrated. A solution of the concentrate and DMAP (1 equiv.) in CH<sub>3</sub>CN was treated with (Boc)<sub>2</sub>O (3 equiv.) and stirred at room temperature for

12 h. Then the reaction mixture was concentrated. The concentrate was diluted with ethyl acetate and washed with saturated NH<sub>4</sub>Cl solution, water and brine. The organic layer was dried and concentrated. Chromatographic purification afforded the di-*N-tert*-butoxycarbonyl  $\alpha$ -amino acid methyl esters.

***N,N*-di-*tert*-Butoxycarbonyl-L-phenylalanine methyl ester (2).**<sup>3</sup> Following the general procedure 1, and eluting with 8% ethyl acetate in hexane, **2** was obtained in quantitative yield.  $[\alpha]_D^{22}$  -90.3 (*c* 0.7); <sup>1</sup>H NMR (400 MHz)  $\delta$ : 7.27-7.15 (m, 5H), 5.16-5.12 (dd, *J* = 5.6, 10.4 Hz, 1H), 3.73 (s, 3H), 3.44-3.39 (dd, *J* = 4.4, 14.0 Hz, 1H), 3.23-3.17 (dd, *J* = 10.8, 13.6 Hz), 1.37 (s, 18H); <sup>13</sup>C NMR (100 MHz)  $\delta$ : 170.9, 151.6, 137.6, 129.6, 128.4, 126.5, 82.9, 59.4, 52.3, 36.2, 27.8.

**(2*R*,3*R*)-3-Bromo-*N,N*-di-*tert*-butoxycarbonyl-L-phenylalanine methyl ester (3).**

Following the general procedure 2 with silver carbonate or silver oxide, and eluting with 8% ethyl acetate in hexane, **3** was obtained in 45% yield along with **4** in 48% yield.  $[\alpha]_D^{22}$  -165.4 (*c* 1.1); <sup>1</sup>H NMR (500 MHz)  $\delta$ : 7.54-7.53 (d, *J* = 7.0 Hz, 2H), 7.36-7.33 (t, *J* = 8.0 Hz, 2H), 7.29-7.26 (t, *J* = 7.0 Hz, 1H), 5.77-5.75 (d, *J* = 10.0 Hz, 1H), 5.69-5.67 (d, *J* = 10.5 Hz, 1H), 3.58 (s, 3H), 1.58 (s, 18H); <sup>13</sup>C NMR (125 MHz)  $\delta$ : 168.1, 151.7, 141.1, 128.6, 128.5, 128.3, 83.8, 61.6, 53.8, 52.4, 28.1; ESI-HRMS Calcd for C<sub>20</sub>H<sub>28</sub>BrNO<sub>6</sub> [M + Na]<sup>+</sup> : 480.0998. Found 480.0987.

***N-tert*-Butoxycarbonyl-(2*S*,3*R*)- $\beta$ -hydroxy-L-phenylalanine methyl-D<sub>3</sub> ester (7).**

Following the general procedure of oxazolidinone hydrolysis in MeOH-D<sub>4</sub>, and eluting with 20% ethyl acetate in hexane, **7** was obtained in 76% yield.  $[\alpha]_D^{25}$  -15.4 (*c* 0.7); <sup>1</sup>H NMR (400 MHz)  $\delta$ : 7.36-7.26 (m, 5H), 5.27 (bs, 1H), 5.21 (bs, 1H), 4.53-4.51 (d, *J* = 7.2

Hz, 1H), 3.11 (bs, 1H), 1.31 (s, 9H); <sup>13</sup>C NMR (100 MHz) δ: 171.5, 155.6, 139.8, 128.3, 128.0, 126.0, 80.1, 73.84, 73.78, 59.4, 28.2.

***N*-tert-Butoxycarbonyl-(2*S*,3*S*)-β-hydroxy-L-phenylalanine methyl ester (8).**<sup>4</sup>

Following the general procedure of oxazolidinone hydrolysis at 0 °C, and eluting with 20% ethyl acetate in hexane, **8** was obtained in 79% yield.  $[\alpha]_D^{25} +83.0$  (*c* 0.8); <sup>1</sup>H NMR (400 MHz) δ:7.35-7.24 (m, 5H), 5.30-5.29 (d, *J* = 6.8 Hz, 1H), 5.17 (bs, 1H), 4.72-4.70 (dd, *J* = 3.6, 7.6 Hz, 1H), 4.00-3.99 (d, *J* = 5.6 Hz, 1H), 3.69 (s, 3H), 1.43 (s, 9H); <sup>13</sup>C NMR (100 MHz) δ: 170.3, 156.4, 139.2, 128.3, 128.1, 126.0, 80.7, 75.1, 59.7, 52.4, 28.2.

**Methyl (4*S*,5*R*)-5-phenyl-1,3-oxazolidin-2-oxo-4-carboxylate (9) and Methyl (4*S*,5*S*)-5-phenyl-1,3-oxazolidin-2-oxo-4-carboxylate (10).**<sup>5</sup>

Following the general procedure of oxazolidinone formation with silver trifluoromethanesulfonate and eluting with 40-44% ethyl acetate in hexane **9** and **10** were obtained in 10: 1 ratio and 55% yield. **9**:  $[\alpha]_D^{22} +46.4$  (*c* 1.4); <sup>1</sup>H NMR (400 MHz) δ:7.41-7.36 (m, 5H), 6.87 (bs, 1H), 5.64-5.63 (d, *J* = 5.2 Hz, 1H), 4.31-4.30 (d, *J* = 4.8 Hz, 1H), 3.84 (s, 3H); <sup>13</sup>C NMR (100 MHz) δ:170.2, 158.6, 138.1, 129.2, 129.0, 125.4, 79.4, 61.4, 53.2. **10**:  $[\alpha]_D^{24} +119.3$  (*c* 1.0); <sup>1</sup>H NMR (500 MHz) δ:7.38-7.35 (m, 3H), 7.32-7.26 (dd, *J* = 2.5, 7.5 Hz, 2H), 6.68 (bs, 1H), 5.87-5.85 (d, *J* = 9.0 Hz, 1H), 4.73-4.71 (d, *J* = 9.5 Hz, 1H), 3.22 (s, 3H); <sup>13</sup>C NMR (125 MHz) δ:169.0, 160.0, 133.7, 129.4, 128.5, 128.3, 126.2, 79.6, 60.1, 52.2.

**General procedure for the preparation of 4 and 5 from 9 and 10.**

A solution of the **9** or **10** and DMAP (1 equiv.) in CH<sub>2</sub>Cl<sub>2</sub> was treated with (Boc)<sub>2</sub>O (1.5 equiv.) and stirred at room temperature for 30 mins. Then the reaction mixture was concentrated. The concentrate was diluted with ethyl acetate and washed with saturated

NH<sub>4</sub>Cl solution, water and brine. The organic layer was dried and concentrated. Chromatographic purification afforded the **4** or **5** in quantitative yield.

***N,N*-di-*tert*-Butoxycarbonyl-*O*-*tert*-butoxycarbonyl-L-tyrosine methyl ester (**12**).**

Following the general procedure 1, and eluting with 10% ethyl acetate in hexane, **12** was obtained in quantitative yield.  $[\alpha]_D^{22}$  -79.4 (*c* 1.0); <sup>1</sup>H NMR (500 MHz)  $\delta$ : 7.17-7.15 (d, *J* = 8.5 Hz, 2H), 7.06-7.04 (d, *J* = 8.5 Hz, 2H), 5.13-5.10 (dd, *J* = 5.0, 10.0 Hz, 1H), 3.72 (s, 3H), 3.42-3.38 (dd, *J* = 5.0, 14.0 Hz, 1H), 3.20-3.15 (dd, *J* = 10.0, 14.5 Hz, 1H), 1.52 (s, 9H), 1.37 (s, 18H); <sup>13</sup>C NMR (125 MHz)  $\delta$ : 170.7, 151.7, 151.6, 149.8, 135.1, 130.4, 121.1, 83.3, 83.1, 59.2, 52.3, 35.6, 27.8, 27.7; ESI-HRMS Calcd for C<sub>25</sub>H<sub>37</sub>NO<sub>9</sub> [M + Na]<sup>+</sup>: 518.2366. Found 518.2355.

***N,N*-di-*tert*-Butoxycarbonyl-4-*N*<sup>im</sup>-*tert*-butoxycarbonyl-L-hystidine methyl ester (**18**).**<sup>2</sup>

To a solution of the **17**<sup>1</sup> (1.85 g, 5 mmol) and DMAP (0.61 g, 5 mmol) in CH<sub>3</sub>CN (10 mL) was treated with (Boc)<sub>2</sub>O (3.38 g, 15 mmol) and stirred at room temperature for 12 h. Then the reaction mixture was concentrated. The concentrate was diluted with ethyl acetate and washed with saturated NH<sub>4</sub>Cl solution, water and brine. The organic layer was dried and concentrated. Chromatographic purification using 24% ethyl acetate in hexane afforded **18** (2.35 g, quant.).  $[\alpha]_D^{22}$  -60.3 (*c* 0.7); <sup>1</sup>H NMR (400 MHz)  $\delta$ : 7.96 (s, 1H), 7.10 (s, 1H), 5.30-5.27 (dd, *J* = 5.2, 9.6 Hz, 1H), 3.73 (s, 3H), 3.43-3.39 (dd, *J* = 4.8, 14.8 Hz, 1H), 3.16-3.10 (dd, *J* = 5.2, 14.4 Hz, 1H), 1.58 (s, 9H), 1.44 (s, 18H); <sup>13</sup>C NMR (100 MHz)  $\delta$ : 170.8, 151.7, 147.0, 139.8, 136.6, 114.4, 85.3, 83.0, 57.5, 52.3, 29.2, 27.9; ESI-HRMS Calcd for C<sub>22</sub>H<sub>35</sub>N<sub>3</sub>O<sub>8</sub> [M + Na]<sup>+</sup>: 492.2322. Found 492.2311.

**Preparation of **21** from **20**.** A solution of **20** (0.21 g, 0.51 mmol) in methanol (5 mL) at 0 °C was treated with Cs<sub>2</sub>CO<sub>3</sub> (0.01 g, 0.03 mmol) and stirred at the same temperature for

1 h. Then the reaction mixture was concentrated and the concentrate was diluted with ethyl acetate and washed with saturated NH<sub>4</sub>Cl solution, water and brine. The organic layer was dried and concentrated. Chromatographic purification using 4% MeOH in CHCl<sub>3</sub> afforded **21** (0.15 g, 72%).

***N*-tert-Butoxycarbonyl-2,3-didehydro-L-hystidine methyl ester (22).** <sup>1</sup>H NMR (400 MHz) δ: 7.66 (s, 1H), 7.16 (s, 1H), 6.66 (bs, 1H), 3.80 (s, 3H), 1.44 (s, 9H); <sup>13</sup>C NMR (100 MHz) δ:166.4, 154.0, 135.8, 126.0, 114.1, 113.9, 81.0, 52.3, 28.2; ESI-HRMS Calcd for C<sub>12</sub>H<sub>17</sub>N<sub>3</sub>O<sub>4</sub> [M + Na]<sup>+</sup> : 290.1117. Found 290.1115.

***N,N*-di-tert-Butoxycarbonyl-*N*<sup>in</sup>-tert-butoxycarbonyl-L-tryptophan methyl ester (25).**<sup>3</sup> Following the general procedure 1, and eluting with 8% ethyl acetate in hexane, **25** was obtained in quantitative yield. [α]<sub>D</sub><sup>22</sup> -75.5 (c 0.9); <sup>1</sup>H NMR (400 MHz) δ:8.11-8.09 (d, *J* = 7.2 Hz, 1H), 7.52-7.50 (d, *J* = 8.0 Hz, 1H), 7.38 (s, 1H), 7.29-7.26 (t, *J* = 7.6 Hz, 1H), 7.22-7.18 (t, *J* = 7.2 Hz, 1H), 5.22-5.18 (dd, *J* = 4.8, 9.6 Hz, 1H), 3.75 (s, 3H), 3.53-3.49 (dd, *J* = 4.8, 14.4 Hz, 1H), 3.39-3.32 (dd, *J* = 9.6, 14.0 Hz, 1H), 1.63 (s, 9H), 1.31 (s, 18H); <sup>13</sup>C NMR (100 MHz) δ:170.8, 151.7, 149.5, 135.4, 130.5, 124.3, 124.2, 122.5, 118.9, 116.4, 115.2, 83.4, 82.9, 58.2, 52.3, 28.1, 27.7, 25.6.

## References.

1. Xu, J.; Yadan, J. C. *J. Org. Chem.* **1995**, *60*, 6296.
2. (a) Kokotos, G.; Padron, J. M.; Martin, T.; Gibbons, W. A.; Martin, V. S. *J. Org. Chem.* **1998**, *63*, 3741. (b) Padron, J. M.; Kokotos, G.; Martin, T.; Markidis, T.; Gibbons, W. A.; Martin, V. S. *Tetrahedron: Asymmetry* **1998**, *9*, 3381.
3. Mohapatra, D. K.; Durugkar, K. A. *ARKIVOC* **2005**, *xiv*, 20.
4. Miyata, O.; Asai, H.; Naito, T. *Chem. Pharm. Bull.* **2005**, *53*, 355.
5. (a) Hamersak, Z.; Sepac, D.; Zihner, D.; Sunjic, V. *Synthesis* **2003**, 375. (b) Tomashini, C.; Vecchione, A. *Org. Lett.* **1999**, *1*, 2153.

***N,N*-di-*tert*-Butoxycarbonyl-L-phenylalanine methyl ester (2)**

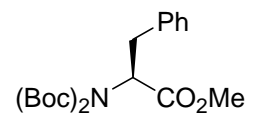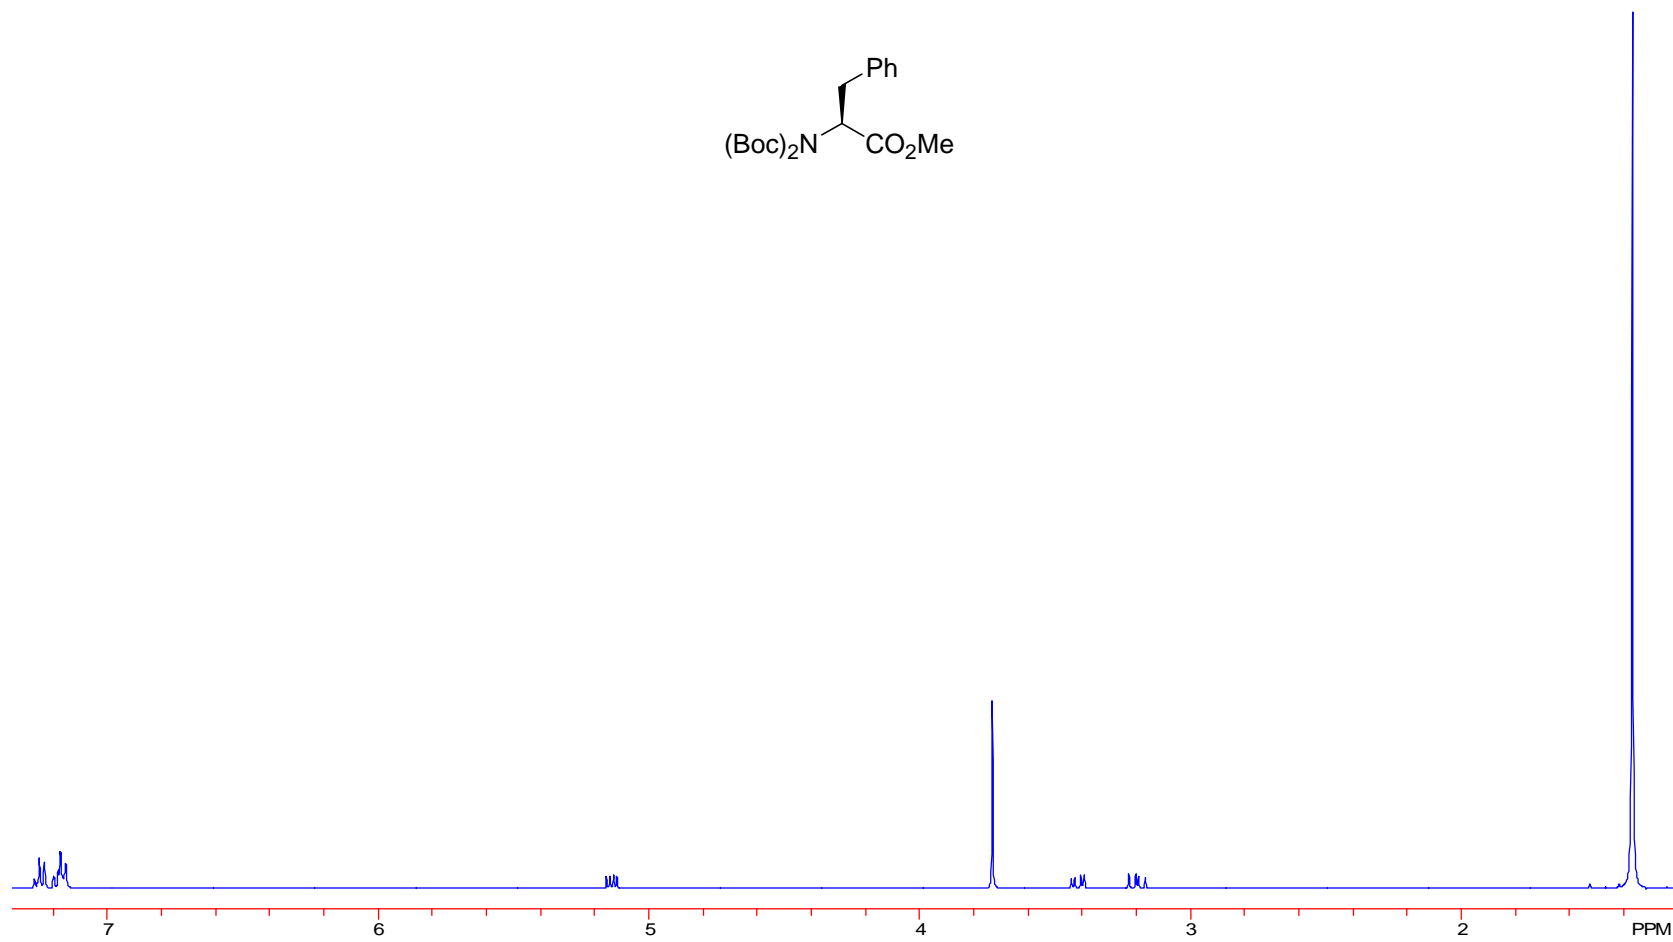

***N,N*-di-*tert*-Butoxycarbonyl-L-phenylalanine methyl ester (2)**

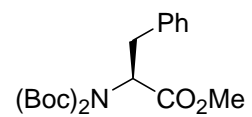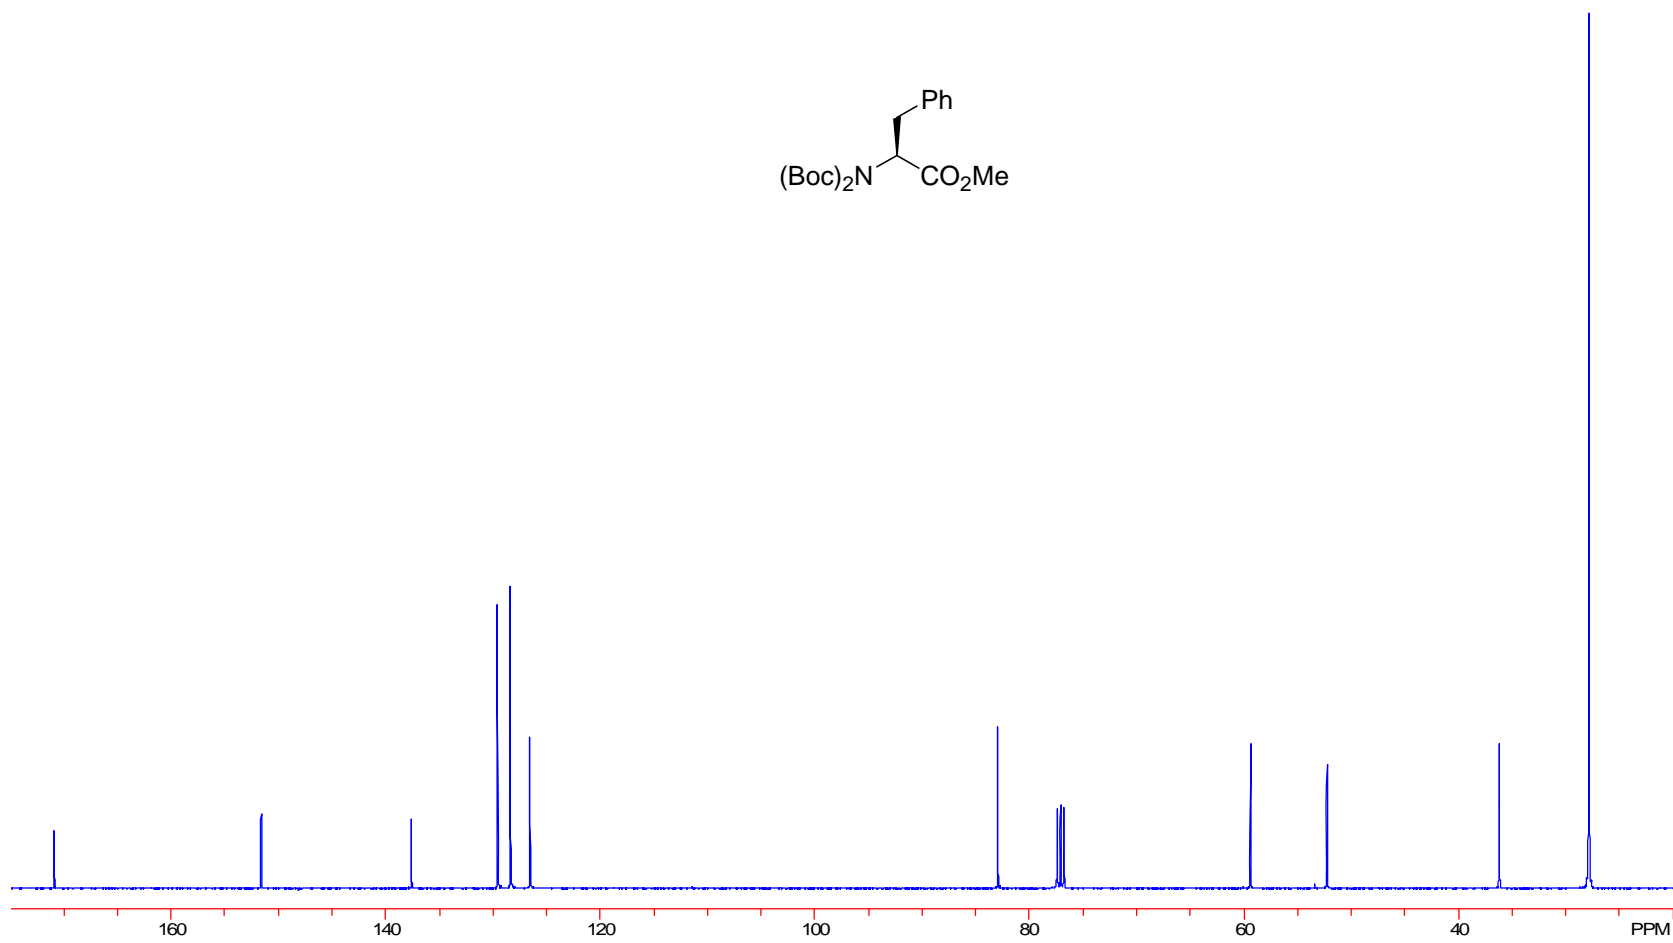



**(2*R*,3*R*)-3-Bromo-*N,N*-di-*tert*-butoxycarbonyl-L-phenylalanine methyl ester (3)**

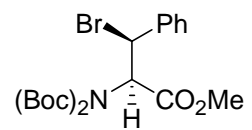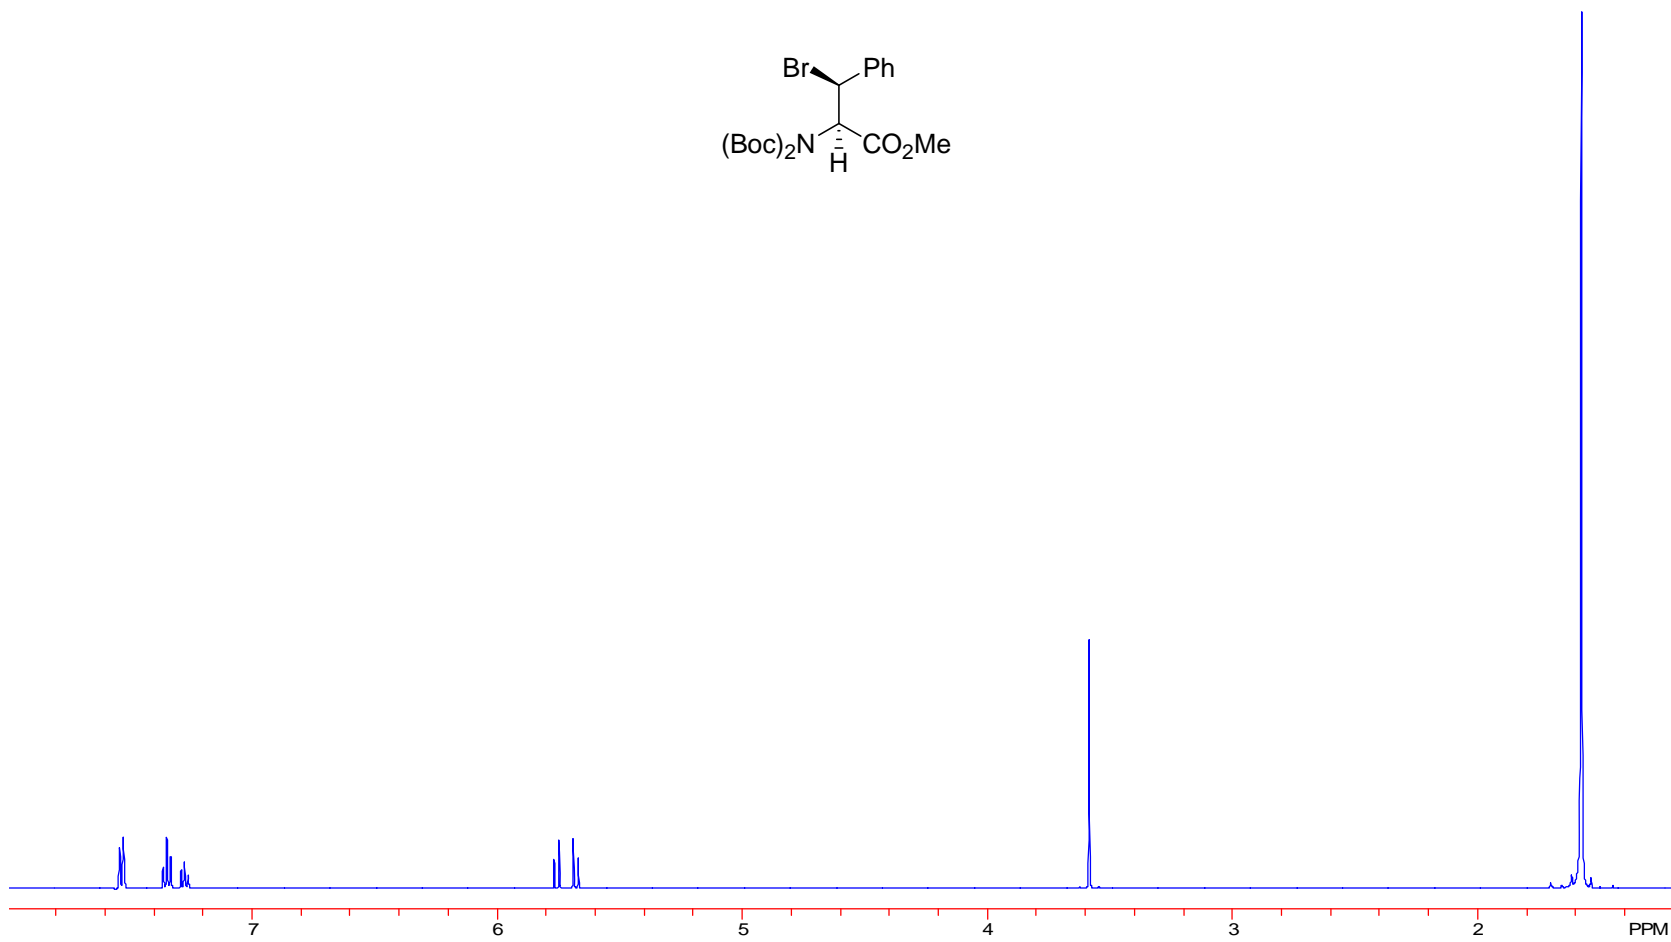

**(2*R*,3*R*)-3-Bromo-*N,N*-di-*tert*-butoxycarbonyl-L-phenylalanine methyl ester (3)**

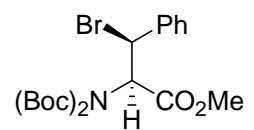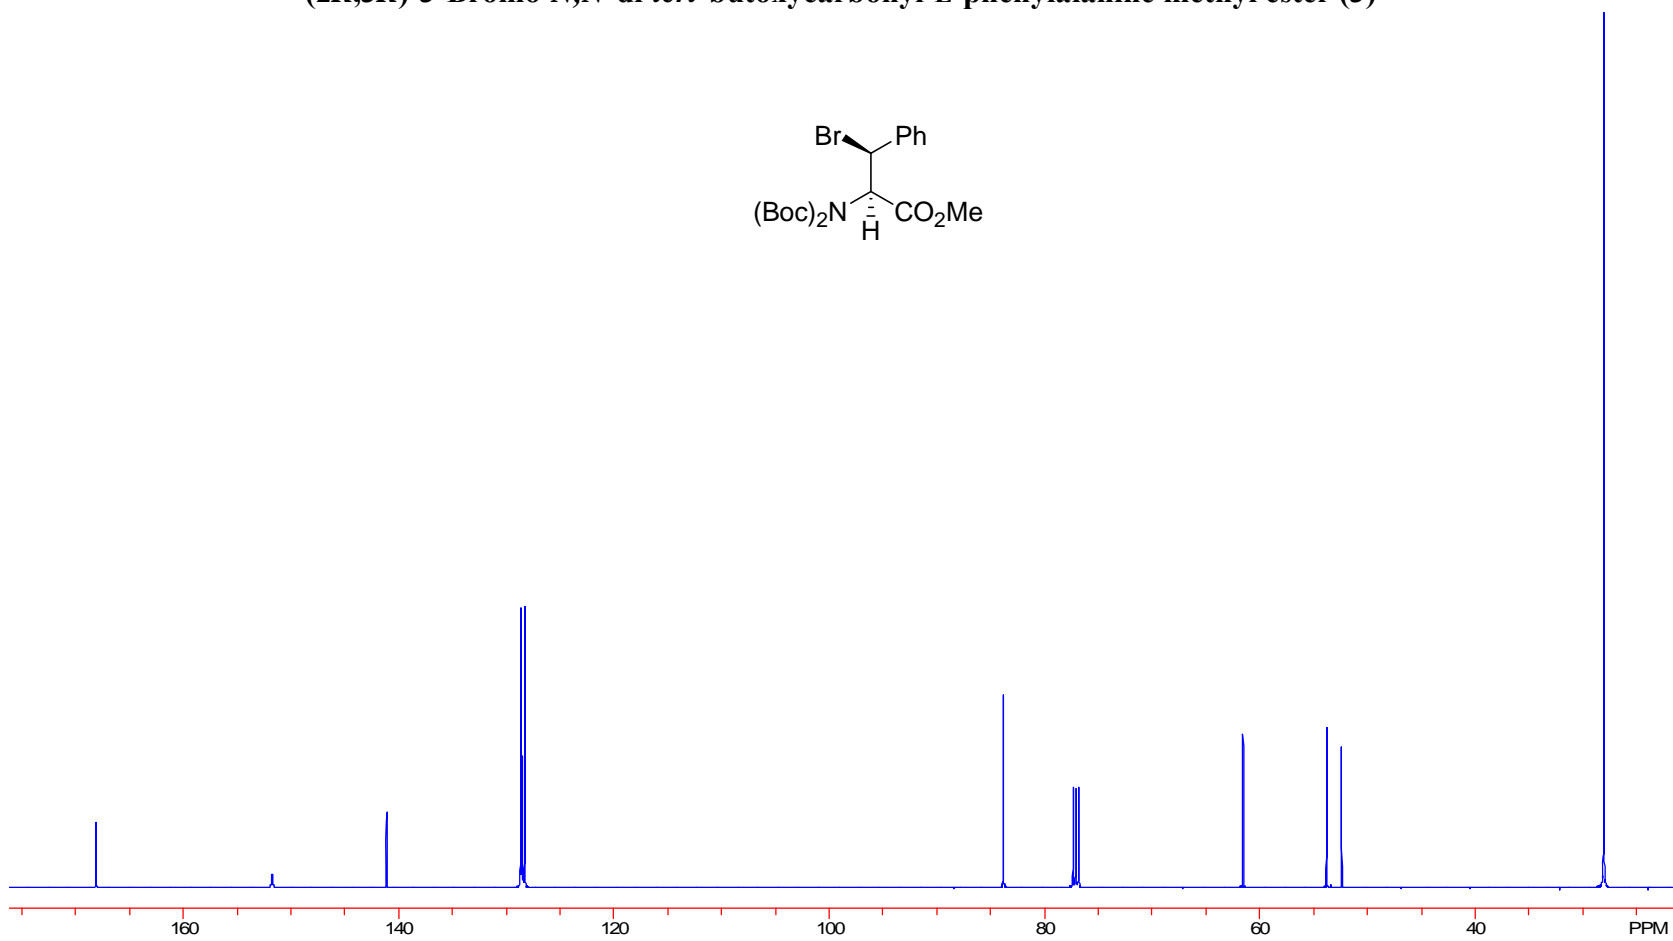

**Methyl (4*S*,5*R*)-3-*N*-*tert*-butoxycarbonyl-5-phenyl-1,3-oxazolidin-2-oxo-4-carboxylate (4)**

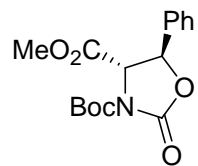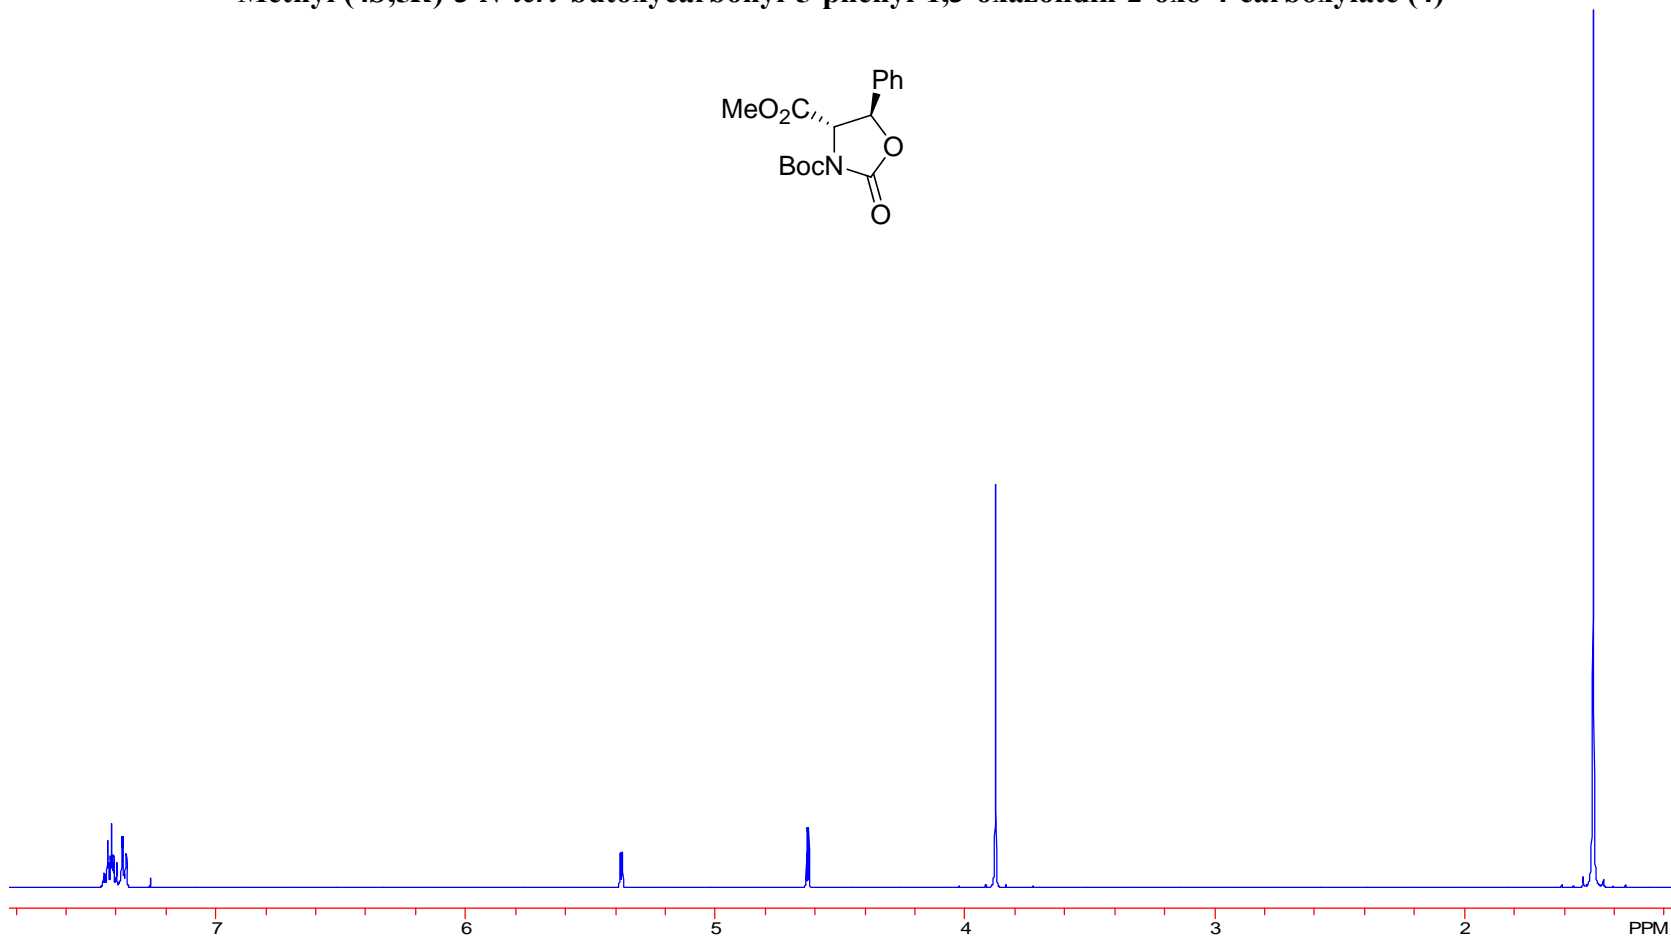

**Methyl (4*S*,5*R*)-3-*N*-*tert*-butoxycarbonyl-5-phenyl-1,3-oxazolidin-2-oxo-4-carboxylate (4)**

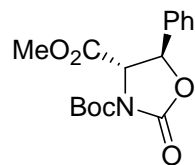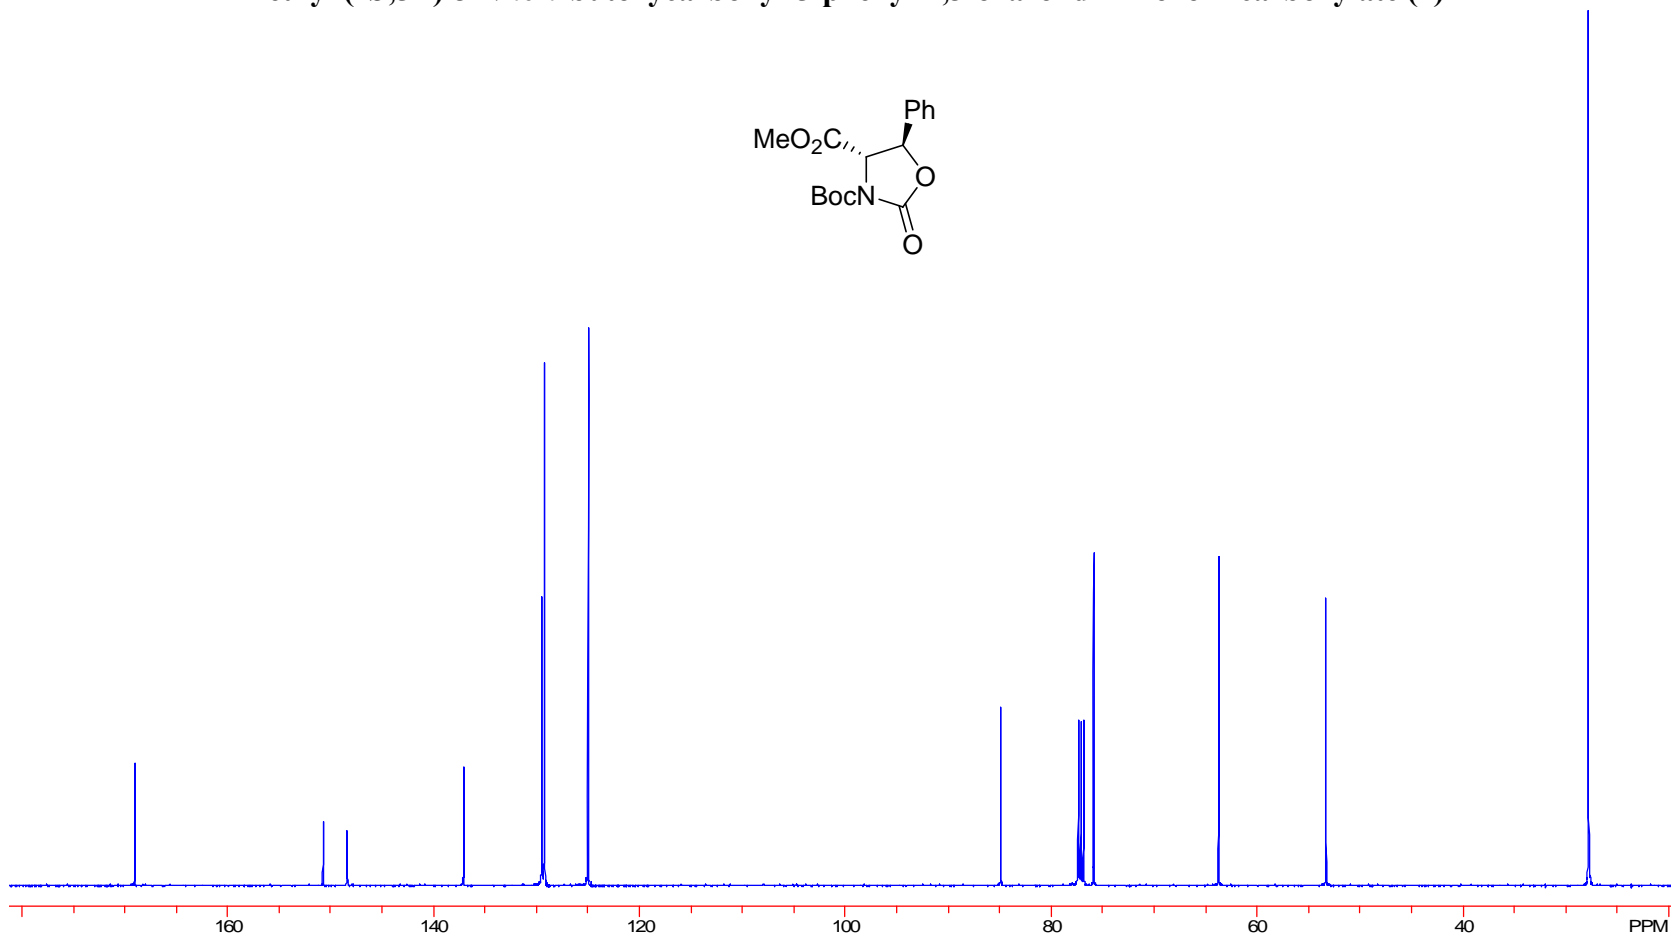

Methyl (4*S*,5*S*)-3-*N*-*tert*-butoxycarbonyl-5-phenyl-1,3-oxazolidin-2-oxo-4-carboxylate (5)

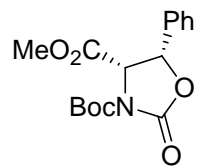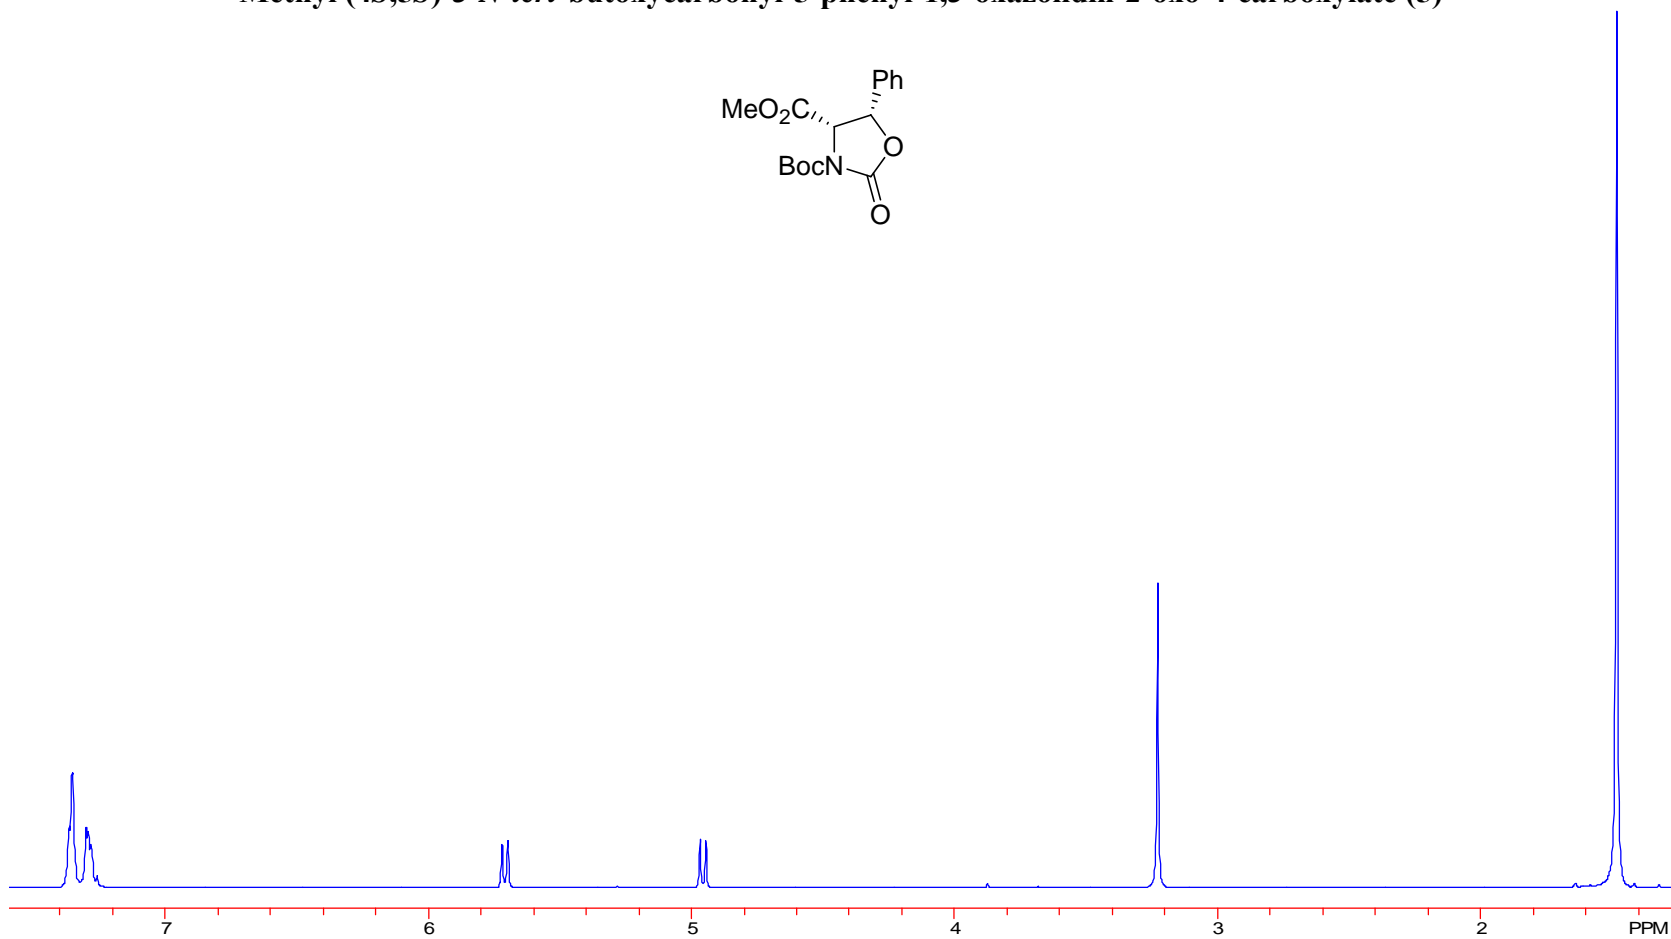

Methyl (4*S*,5*S*)-3-*N*-*tert*-butoxycarbonyl-5-phenyl-1,3-oxazolidin-2-oxo-4-carboxylate (5)

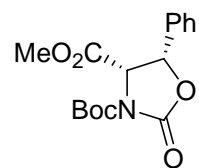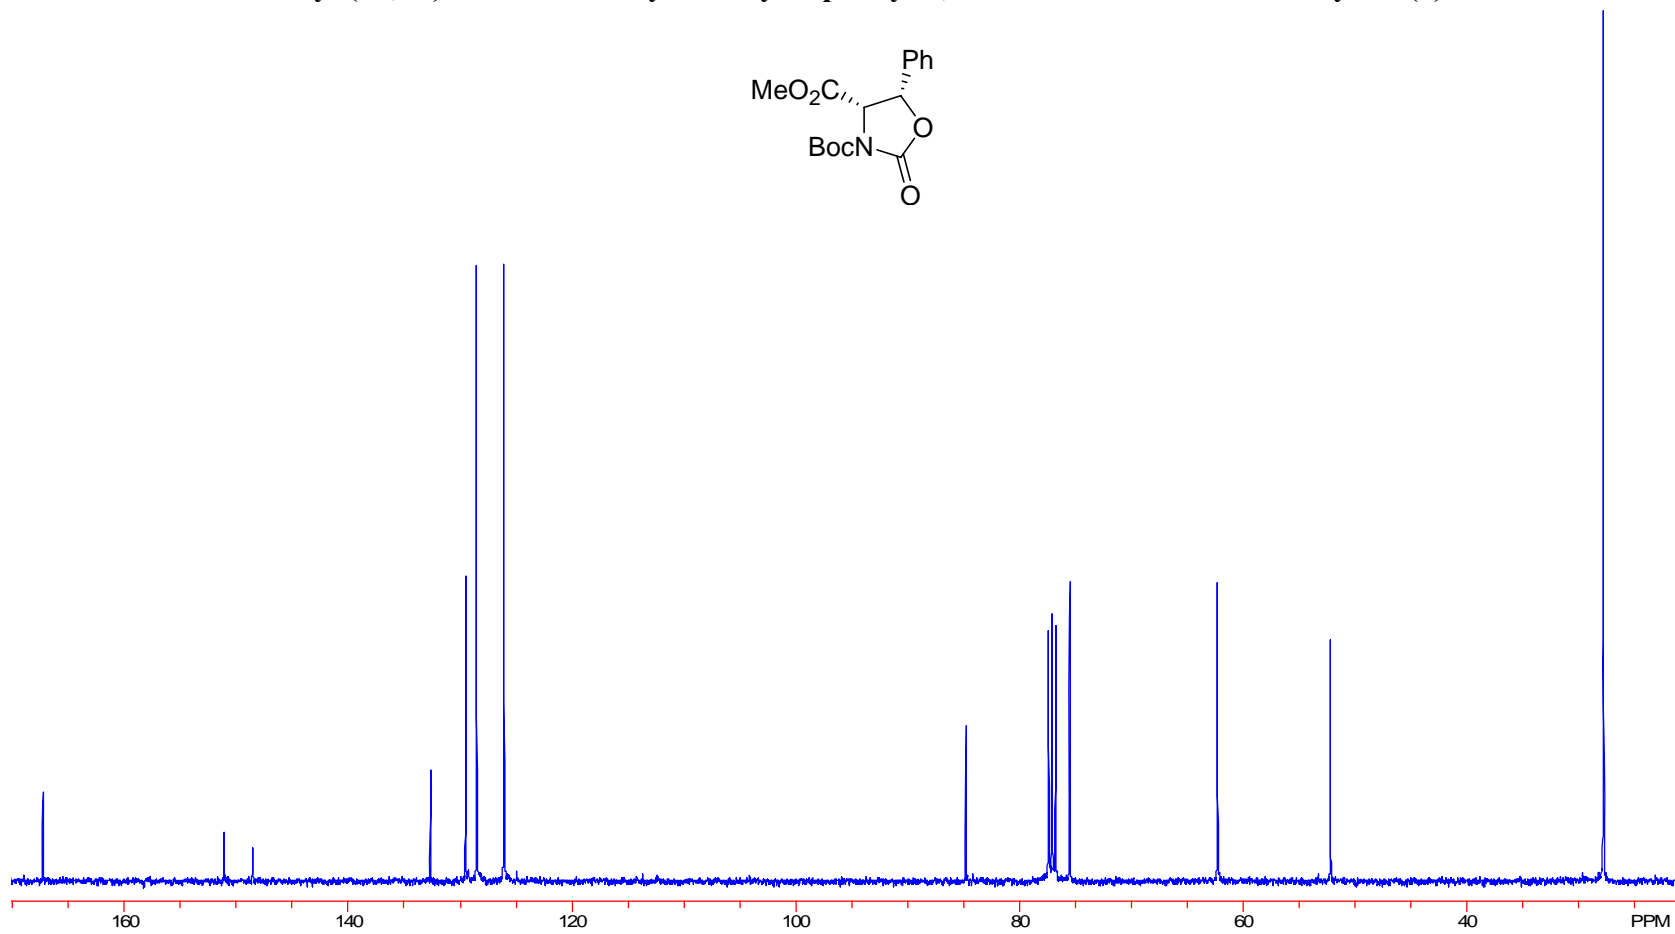

***N*-tert-Butoxycarbonyl-(2*S*,3*R*)- $\beta$ -hydroxy-L-phenylalanine methyl ester (6)**

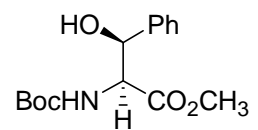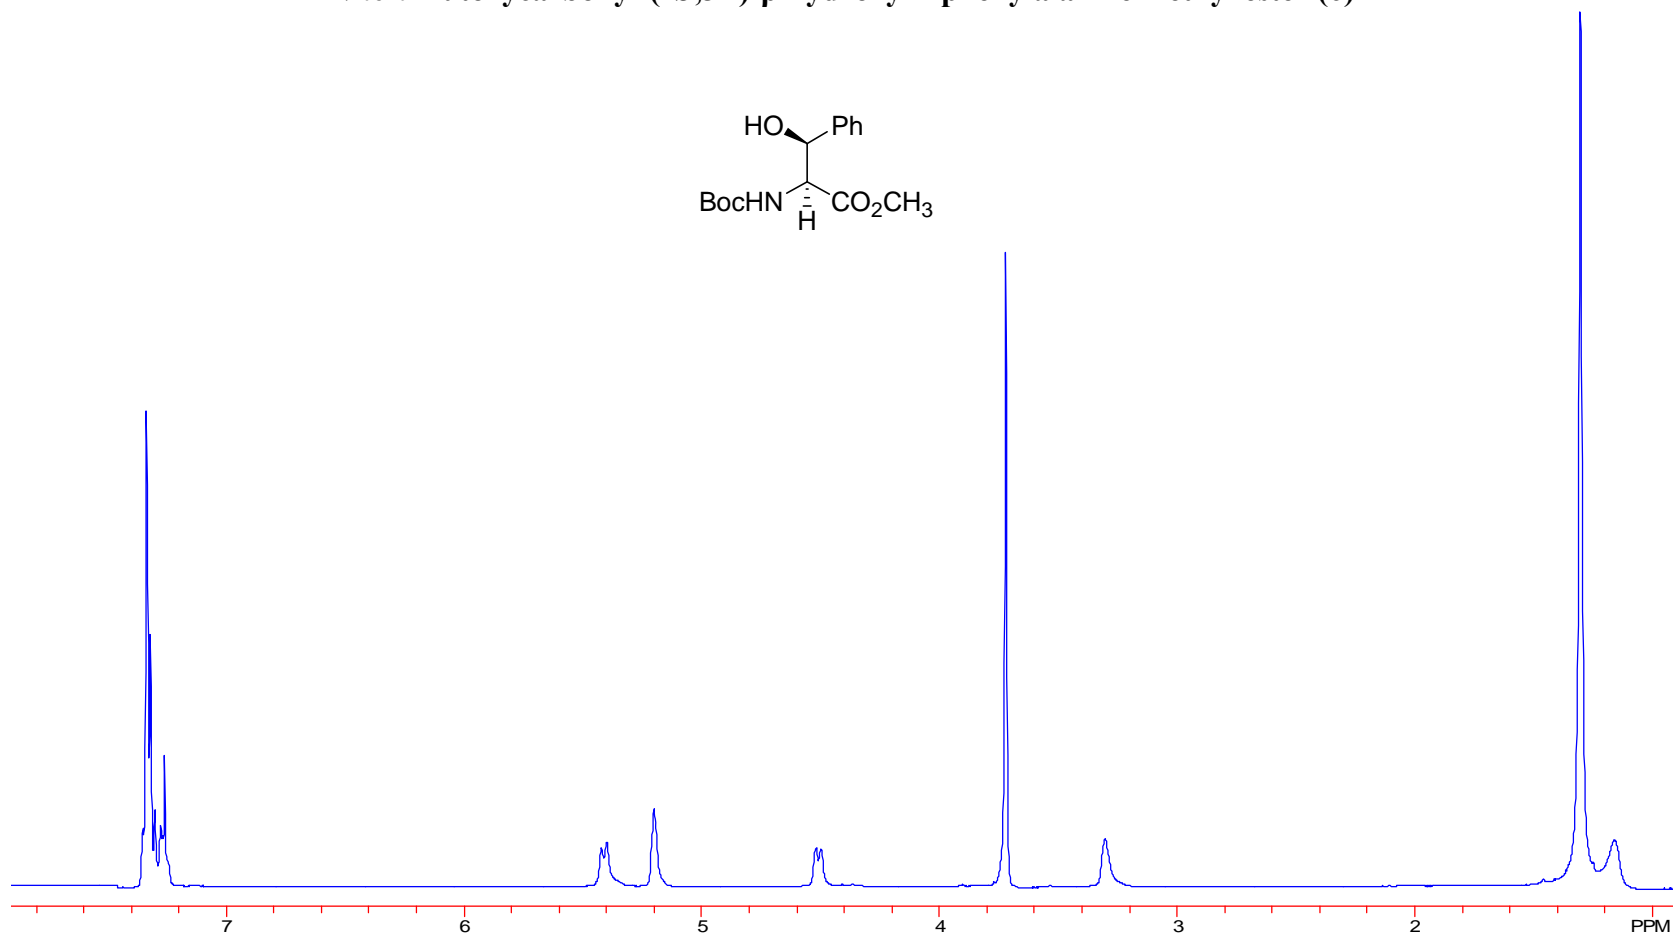

***N*-tert-Butoxycarbonyl-(2*S*,3*R*)- $\beta$ -hydroxy-L-phenylalanine methyl ester (6)**

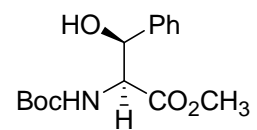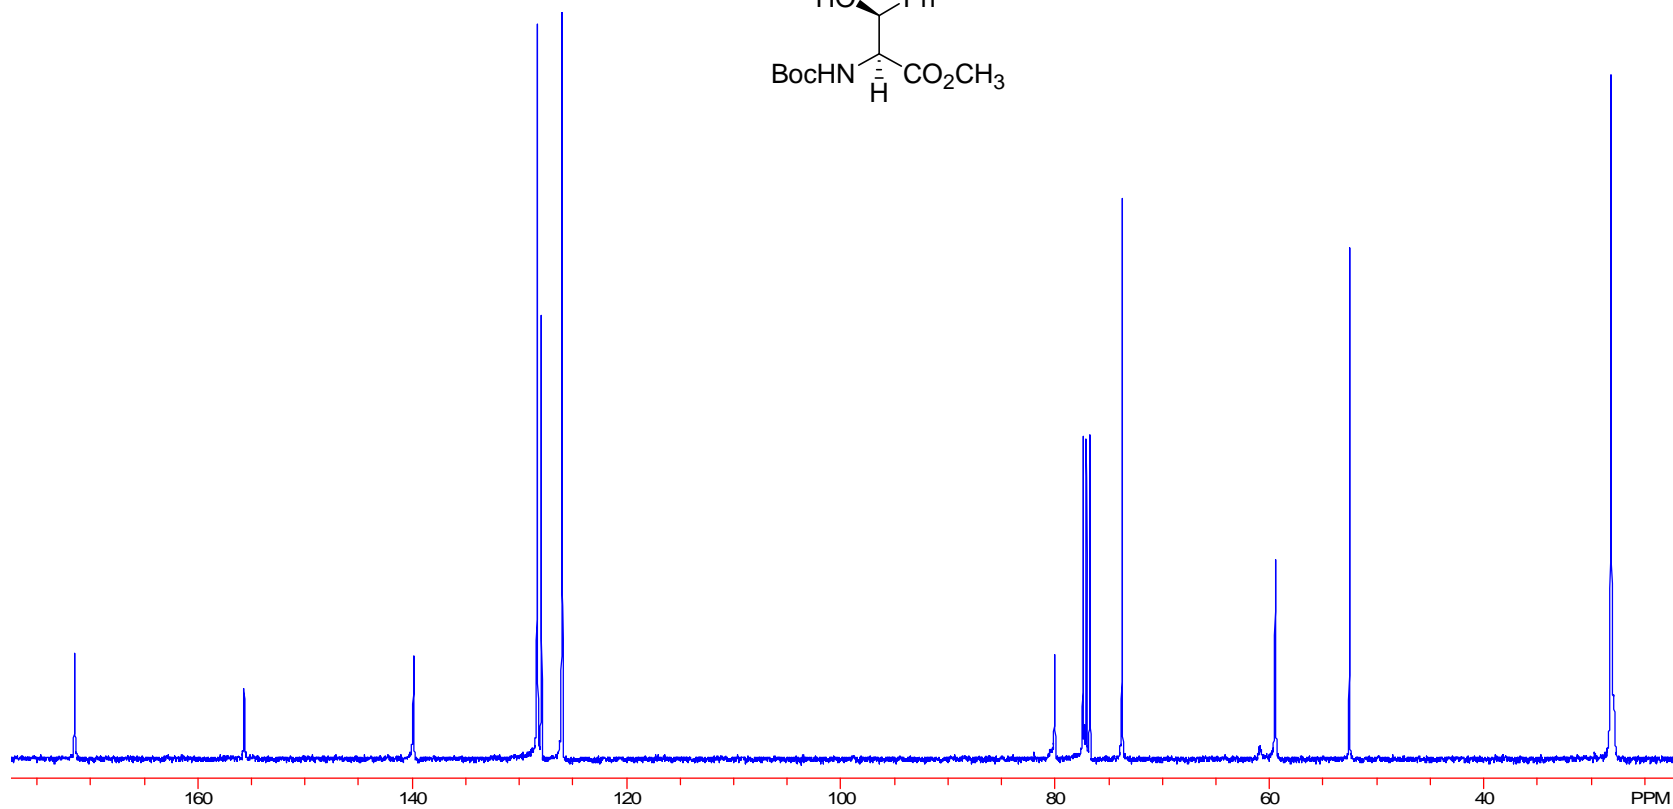



***N*-tert-Butoxycarbonyl-(2*S*,3*R*)- $\beta$ -hydroxy-L-phenylalanine methyl-D<sub>3</sub> ester (7)**

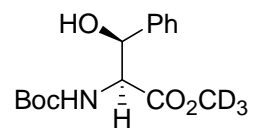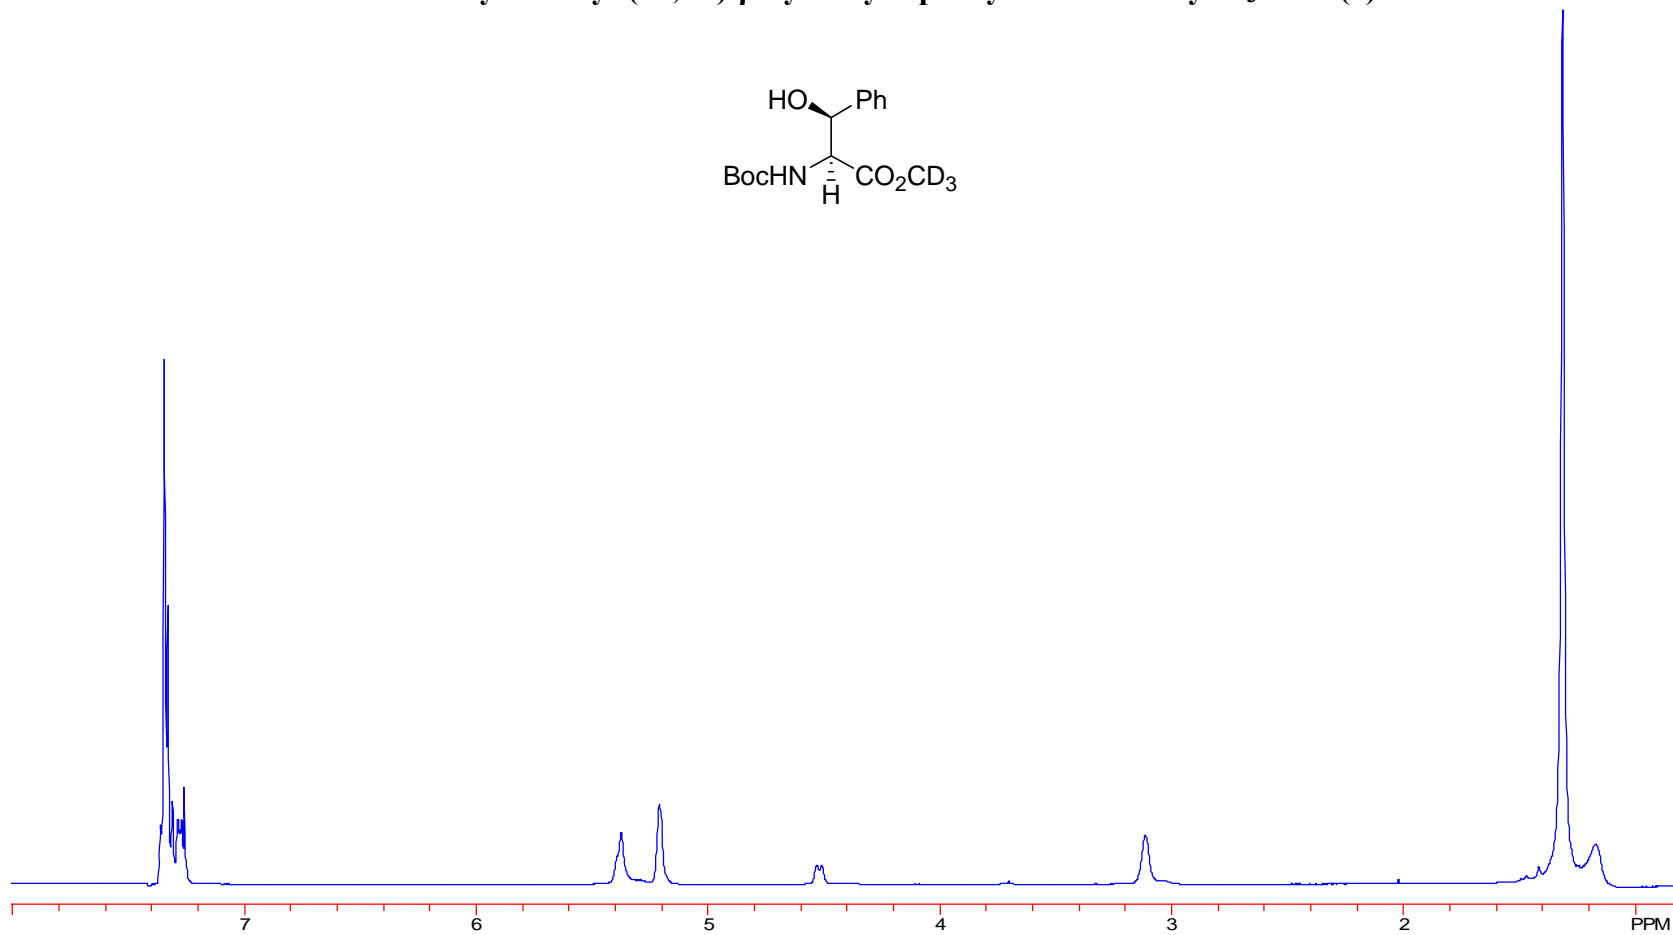

***N*-tert-Butoxycarbonyl-(2*S*,3*R*)- $\beta$ -hydroxy-L-phenylalanine methyl-D<sub>3</sub> ester (7)**

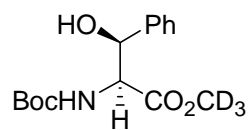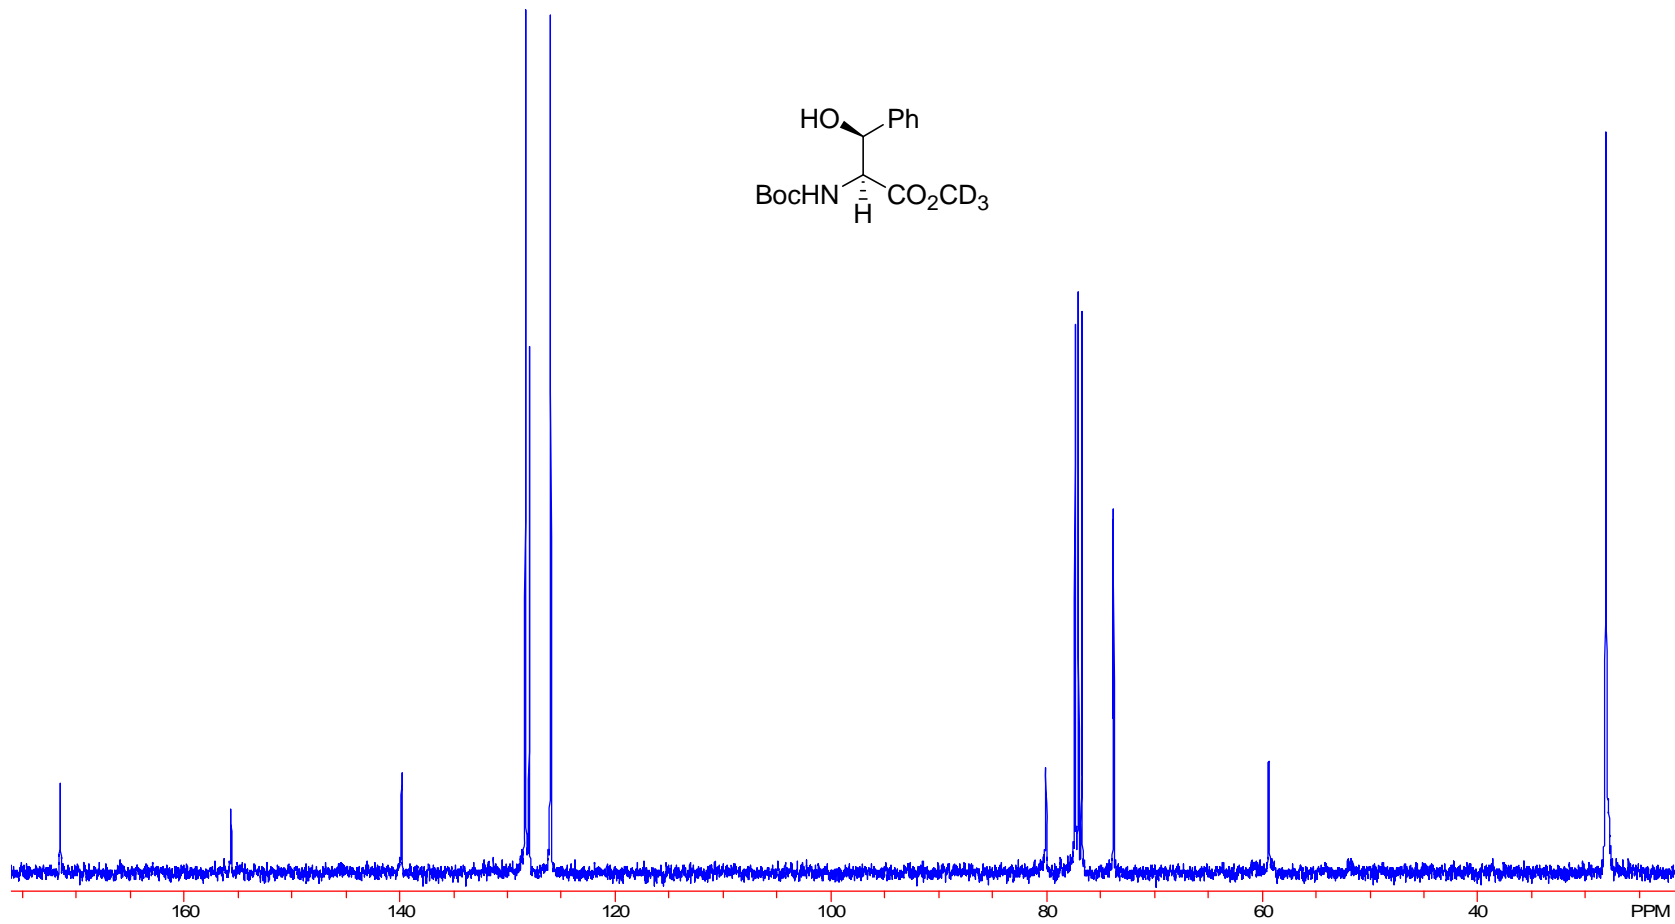

***N*-tert-Butoxycarbonyl-(2*S*,3*S*)- $\beta$ -hydroxy-L-phenylalanine methyl ester (8)**

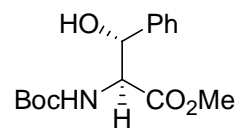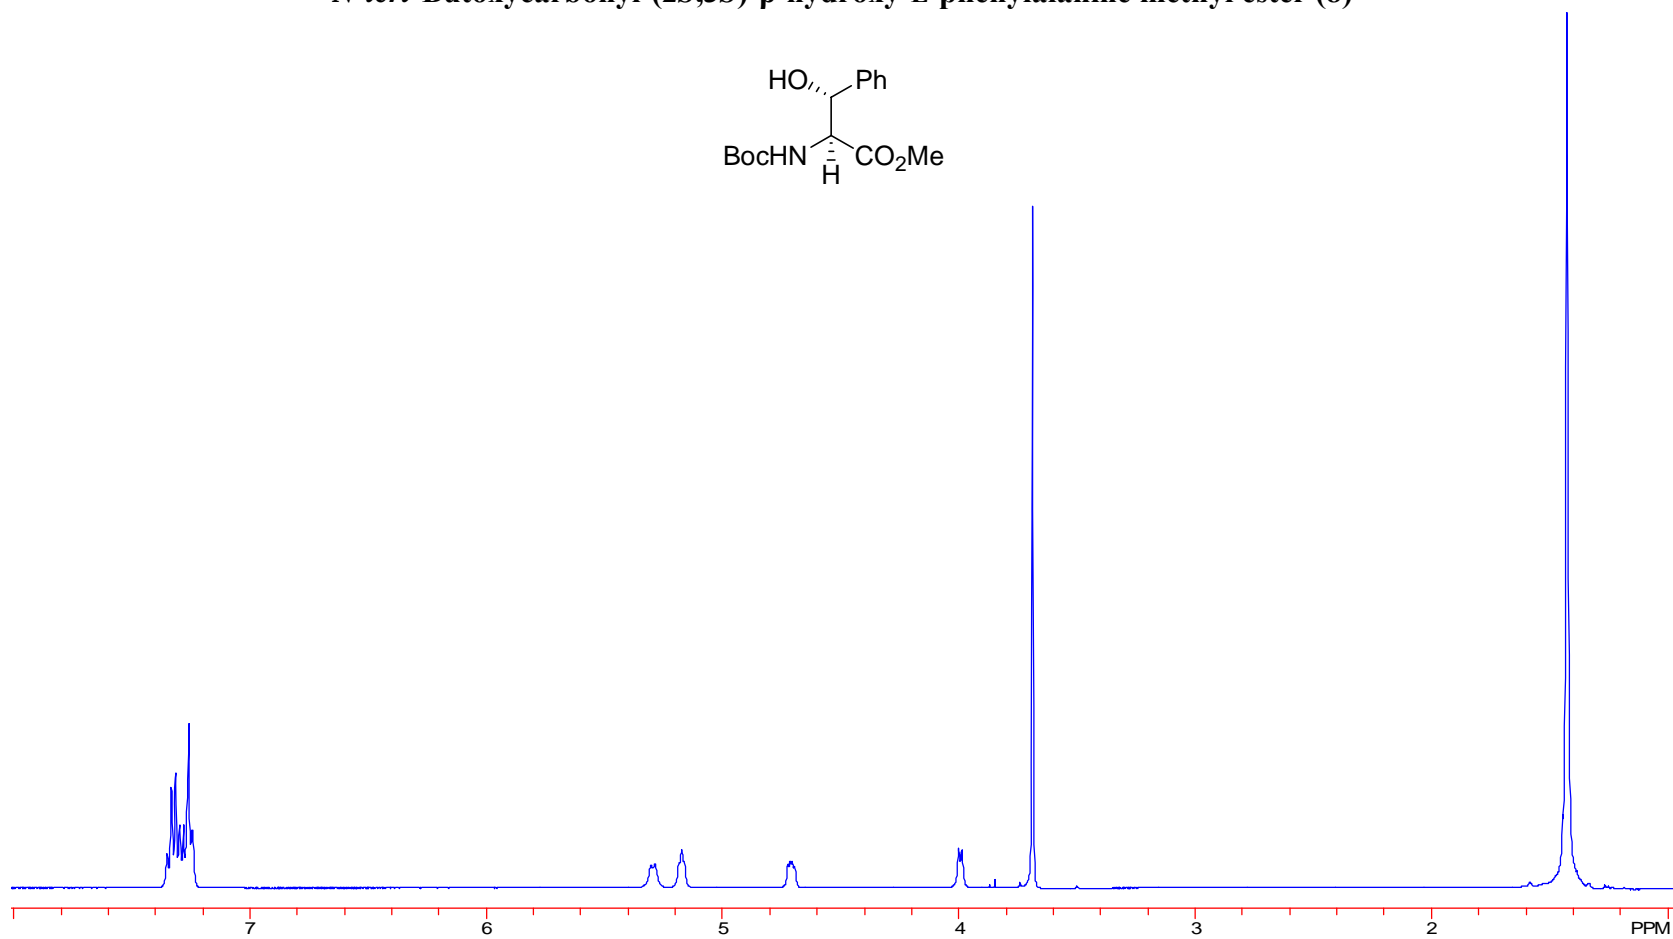

***N*-tert-Butoxycarbonyl-(2*S*,3*S*)- $\beta$ -hydroxy-L-phenylalanine methyl ester (8)**

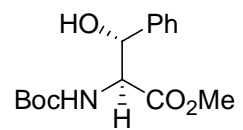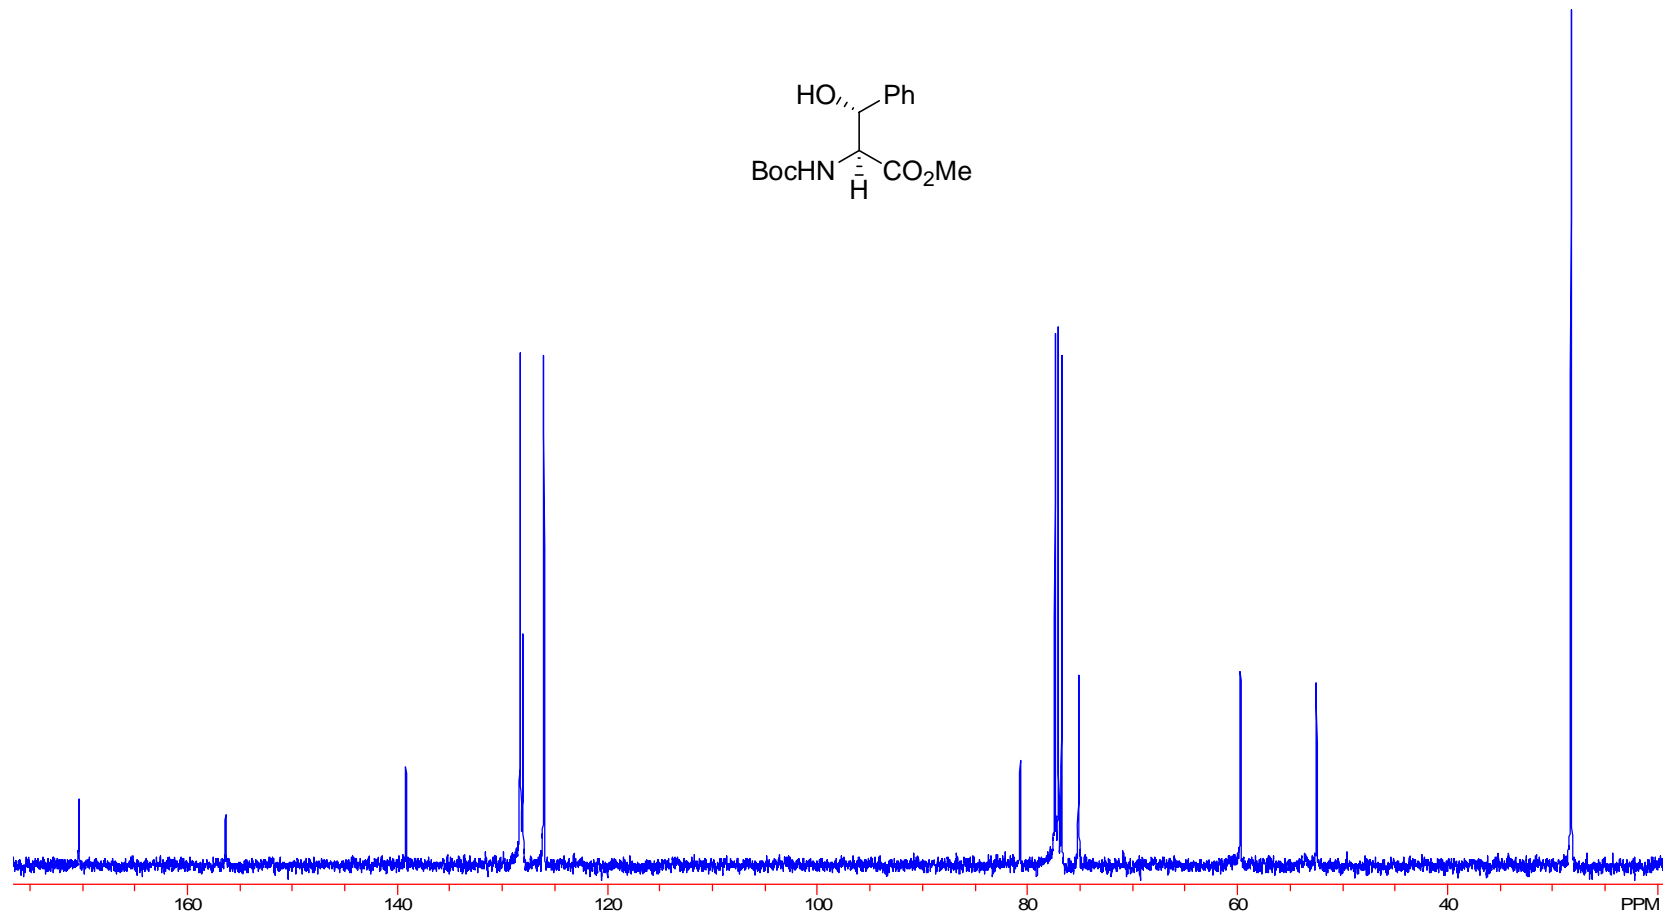

**Methyl (4*S*,5*R*)-5-phenyl-1,3-oxazolidin-2-oxo-4-carboxylate (9)**

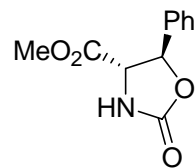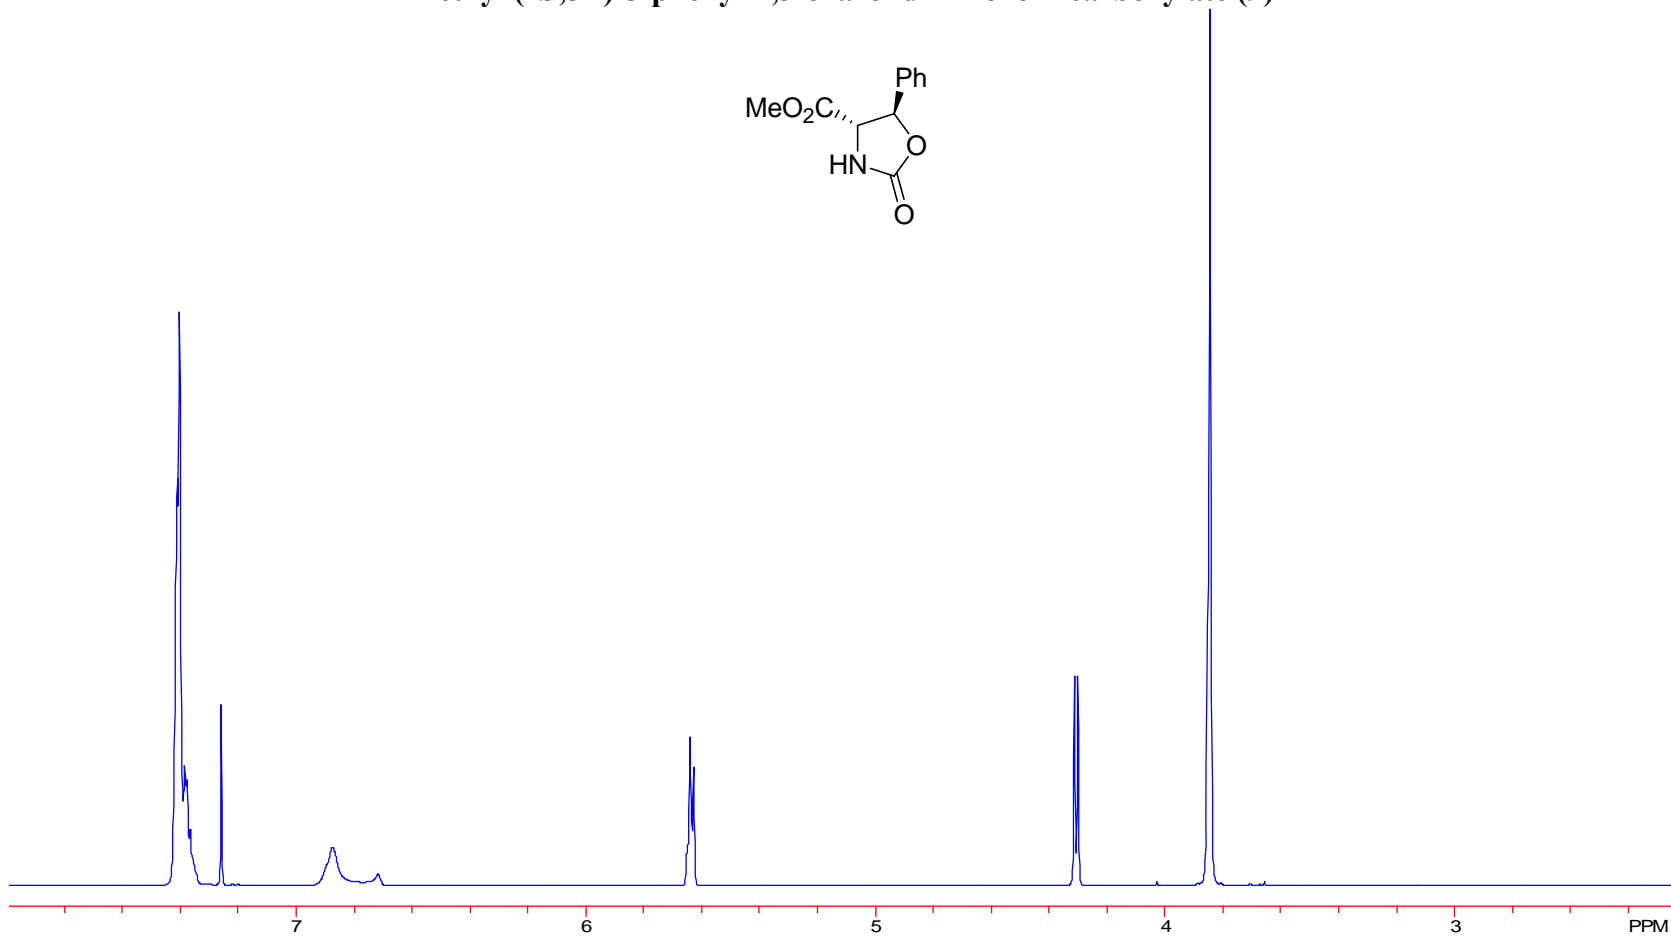

**Methyl (4*S*,5*R*)-5-phenyl-1,3-oxazolidin-2-oxo-4-carboxylate (9)**

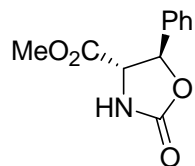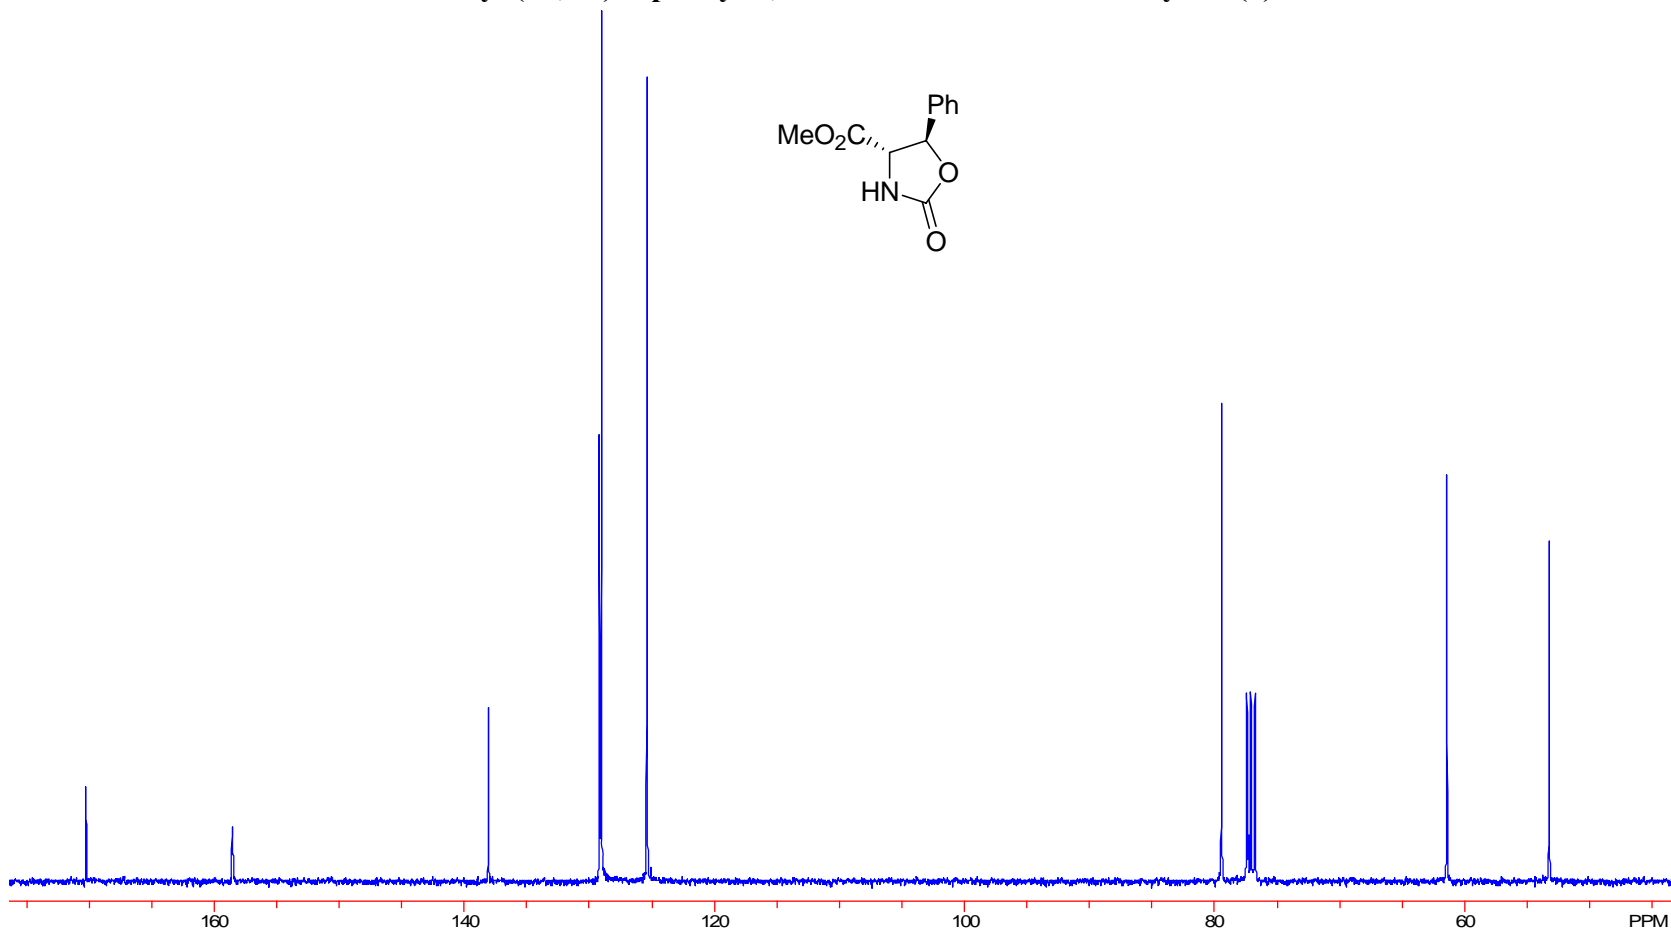

**Methyl (4*S*,5*S*)-5-phenyl-1,3-oxazolidin-2-oxo-4-carboxylate (10)**

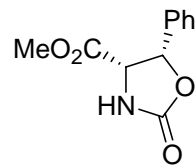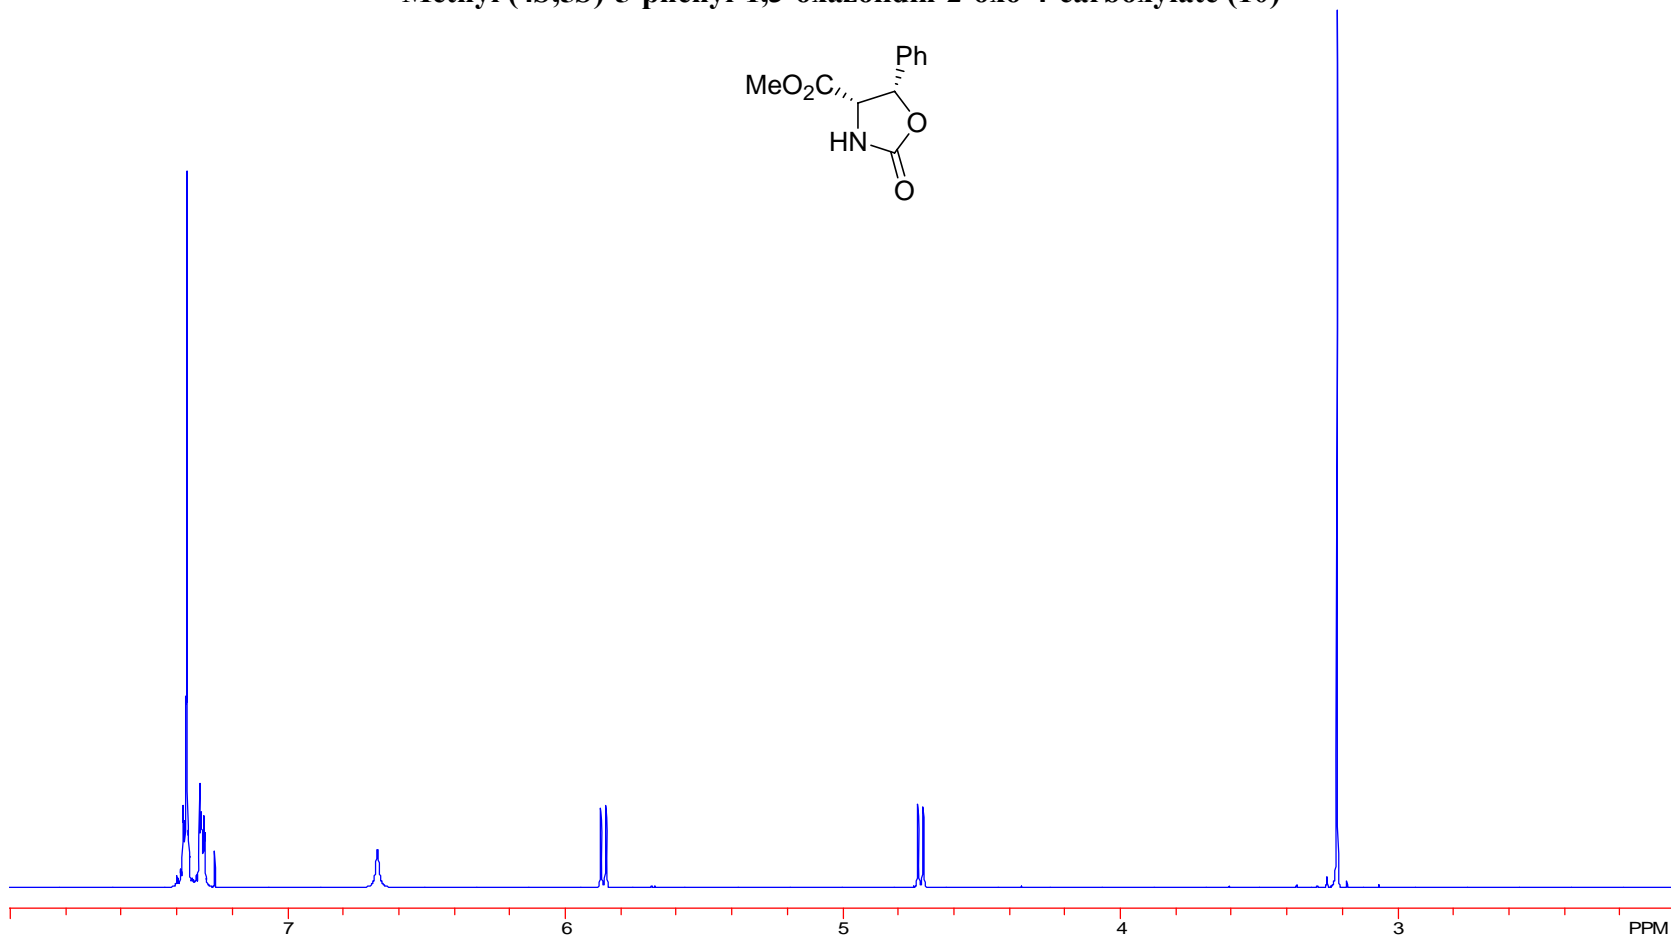

**Methyl (4*S*,5*S*)-5-phenyl-1,3-oxazolidin-2-oxo-4-carboxylate (10)**

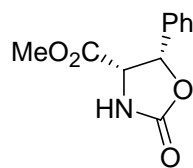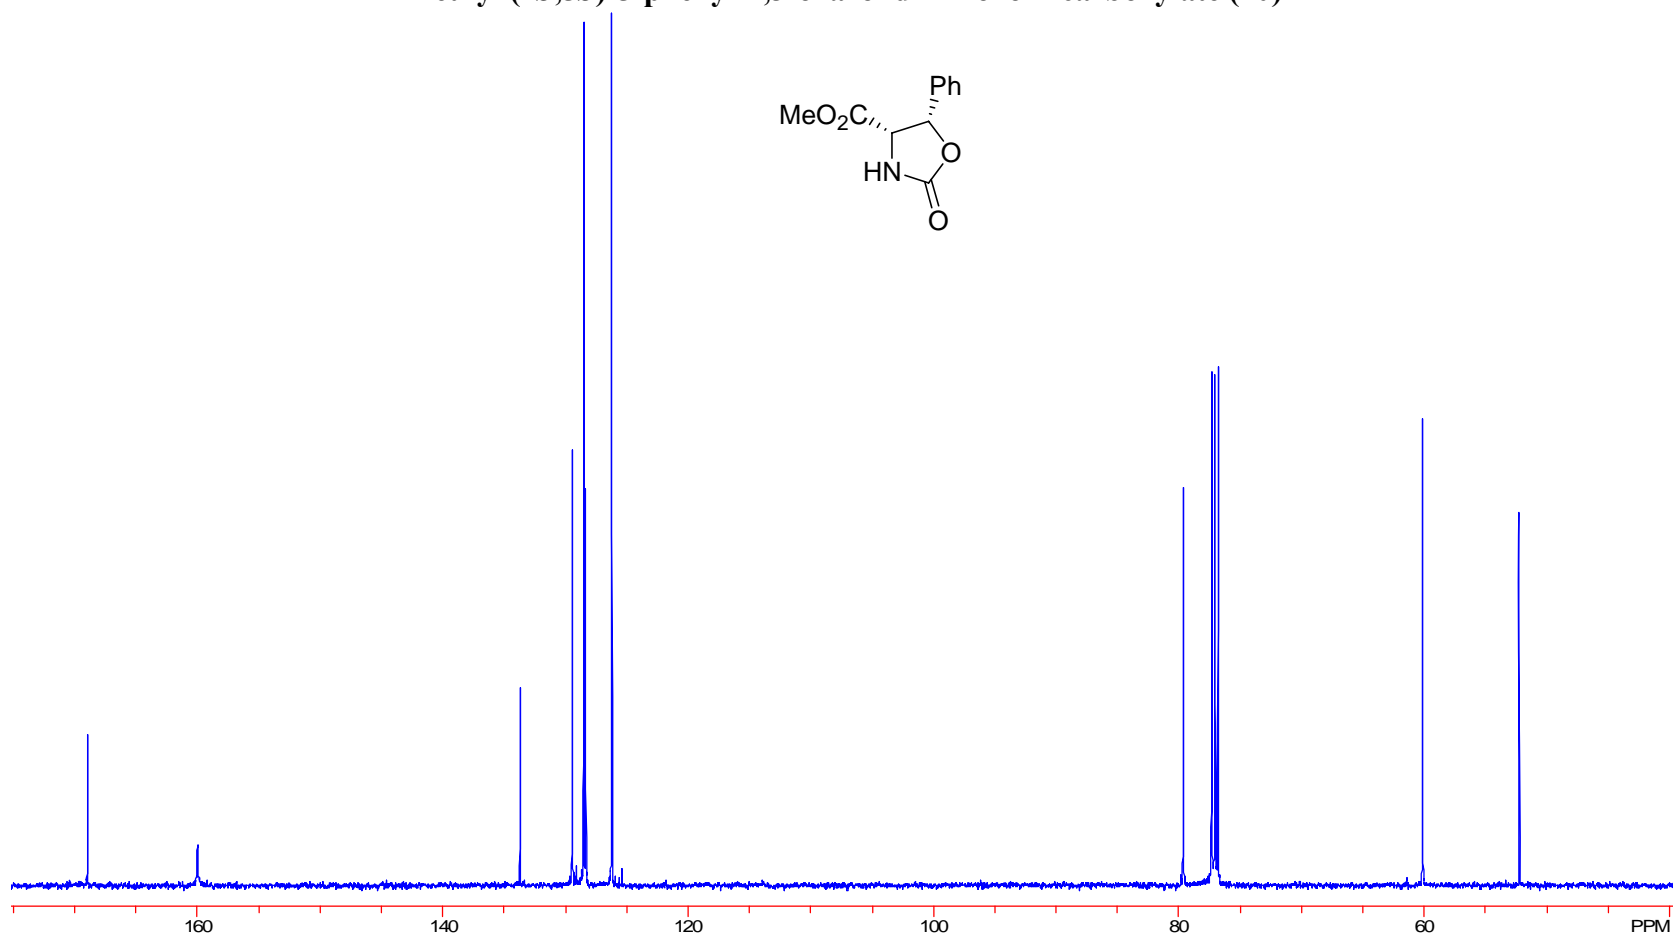



***N,N*-di-*tert*-Butoxycarbonyl-*O*-*tert*-butoxycarbonyl-L-tyrosine methyl ester (12)**

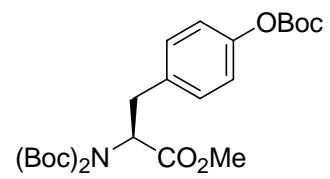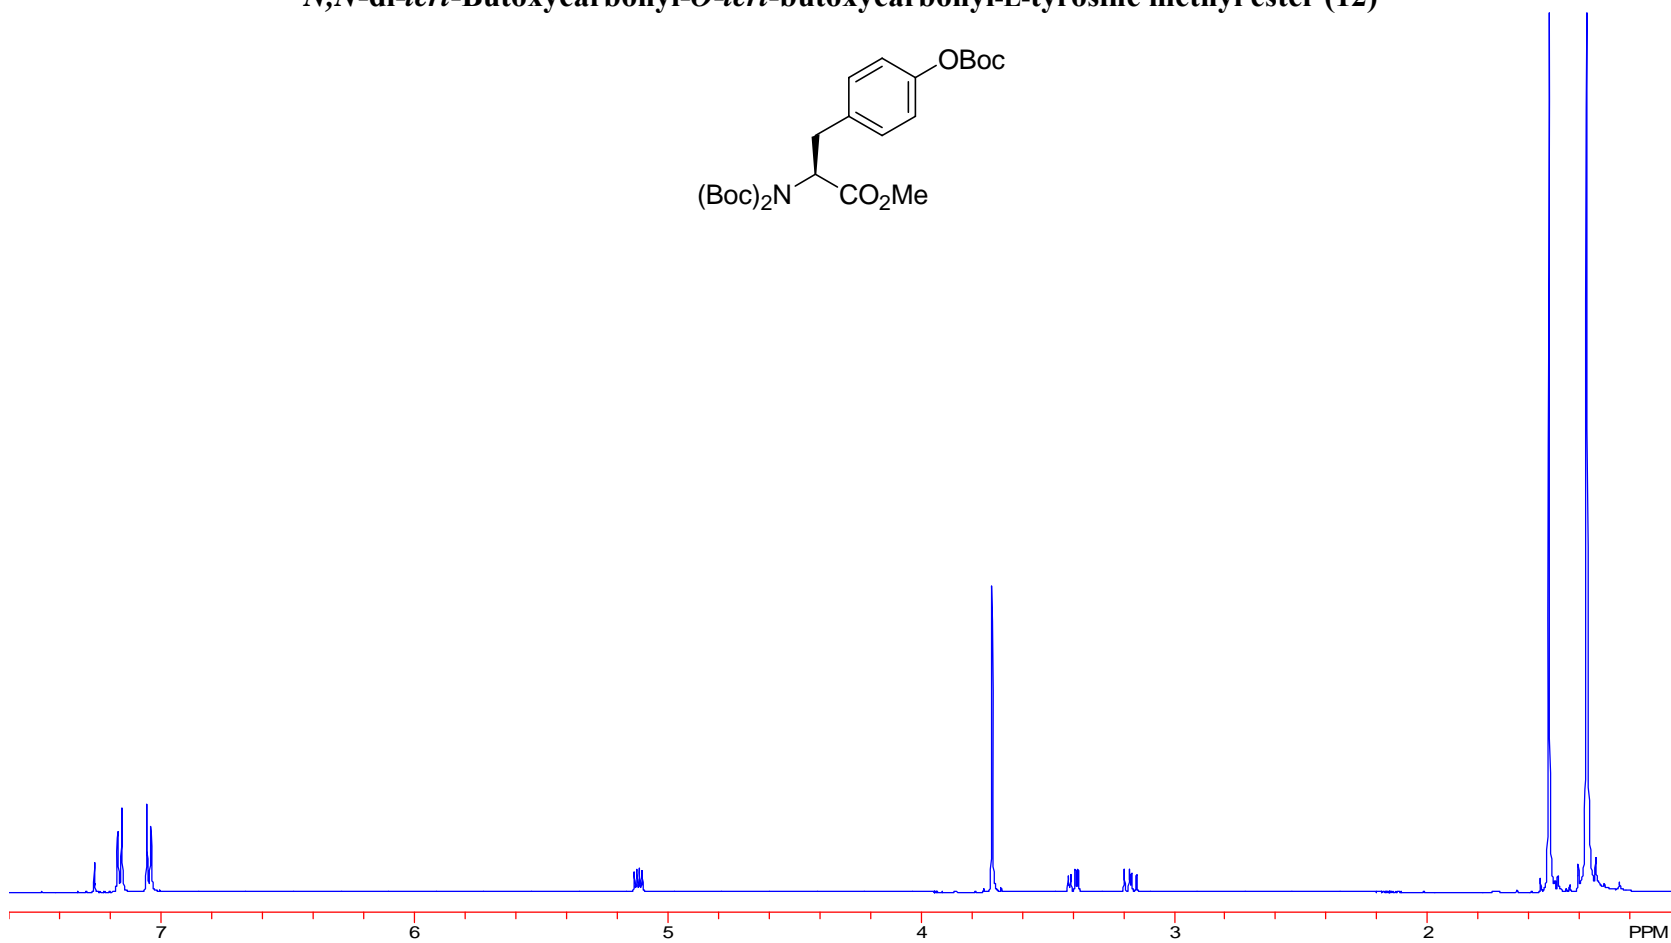

***N,N*-di-*tert*-Butoxycarbonyl-*O*-*tert*-butoxycarbonyl-L-tyrosine methyl ester (12)**

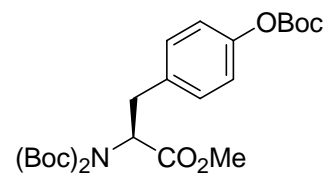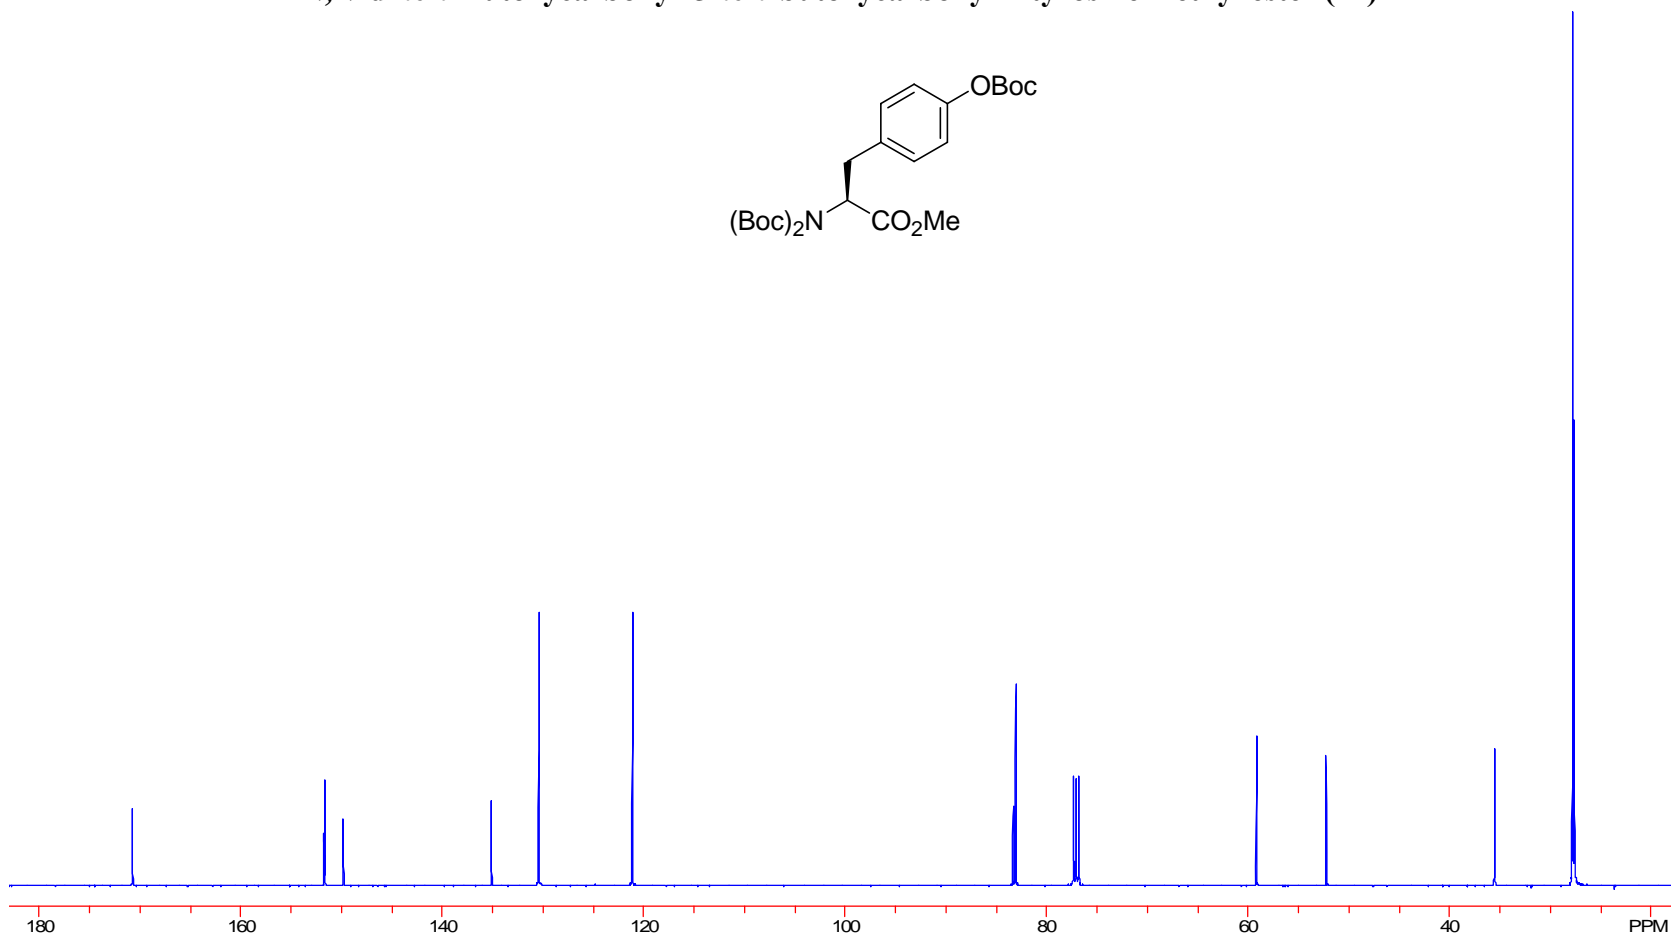

**Methyl (4*S*,5*R*)-3-*N*-*tert*-butoxycarbonyl-5-(4-*tert*-butoxycarbonyloxyphenyl)-1,3-oxazolidin-2-oxo-4-carboxylate (14)**

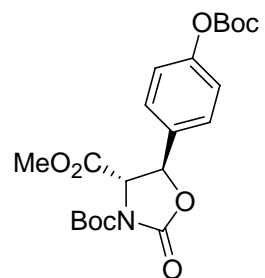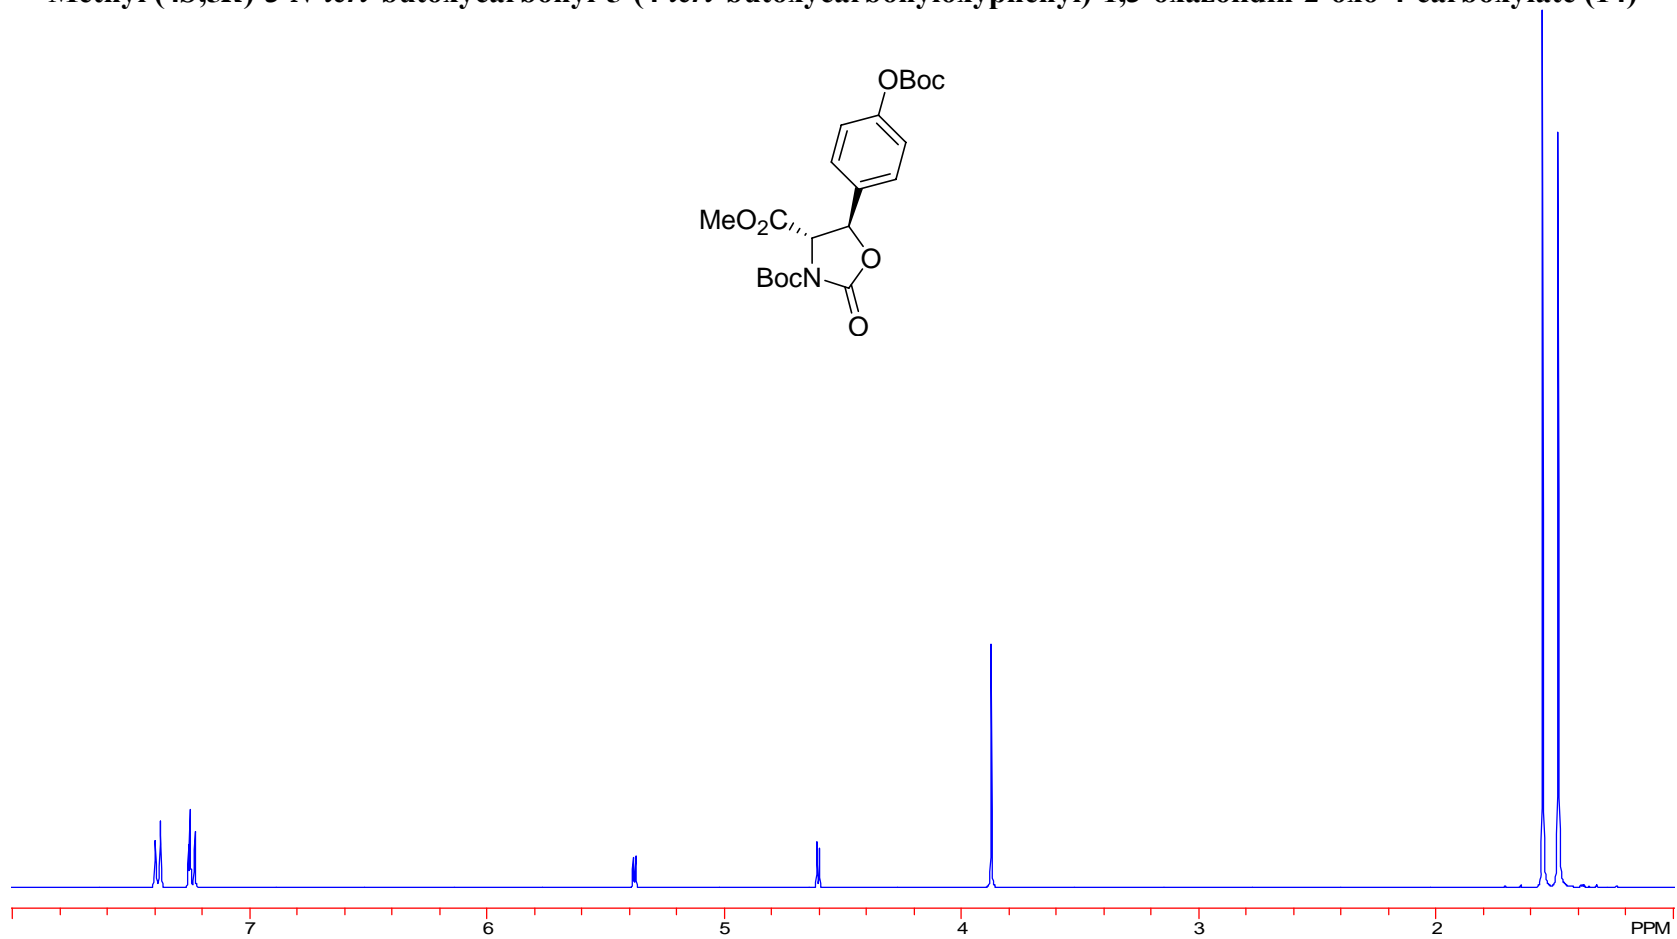

**Methyl (4*S*,5*R*)-3-*N*-*tert*-butoxycarbonyl-5-(4-*tert*-butoxycarbonyloxyphenyl)-1,3-oxazolidin-2-oxo-4-carboxylate (14)**

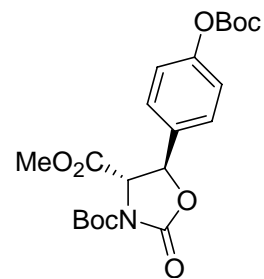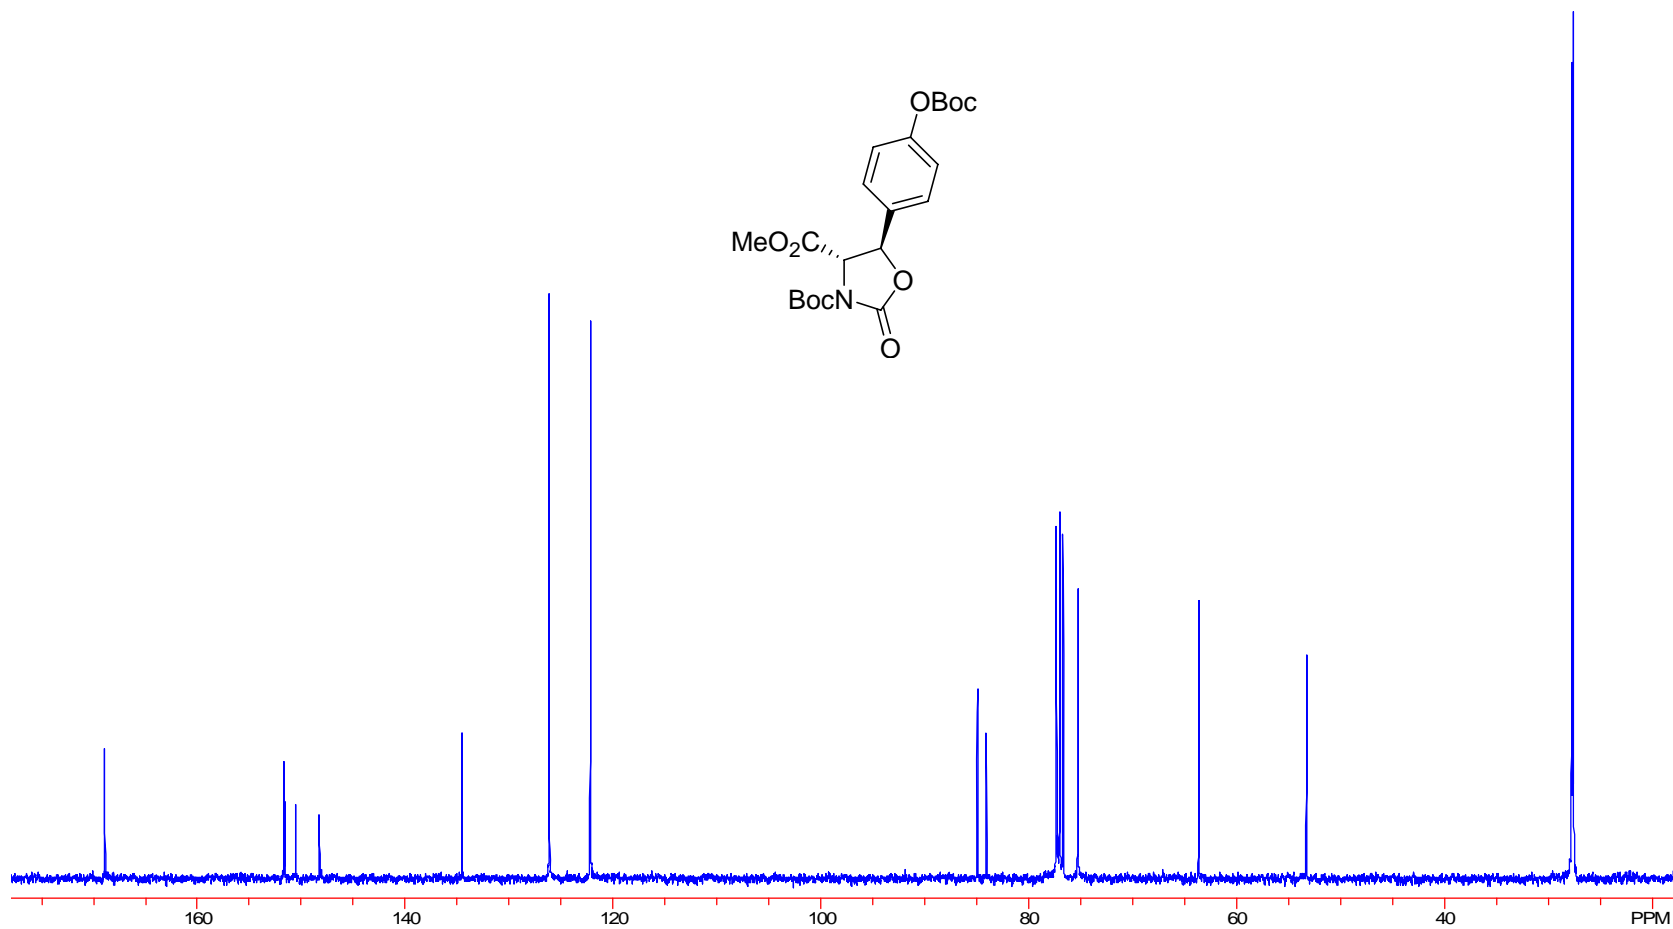

Methyl (4S,5S)-3-N-tert-butoxycarbonyl-5-(4-tert-butoxycarbonyloxyphenyl)-1,3-oxazolidin-2-oxo-4-carboxylate (15)

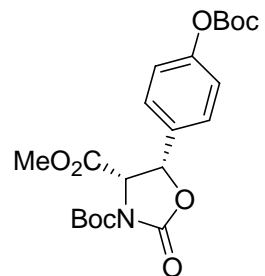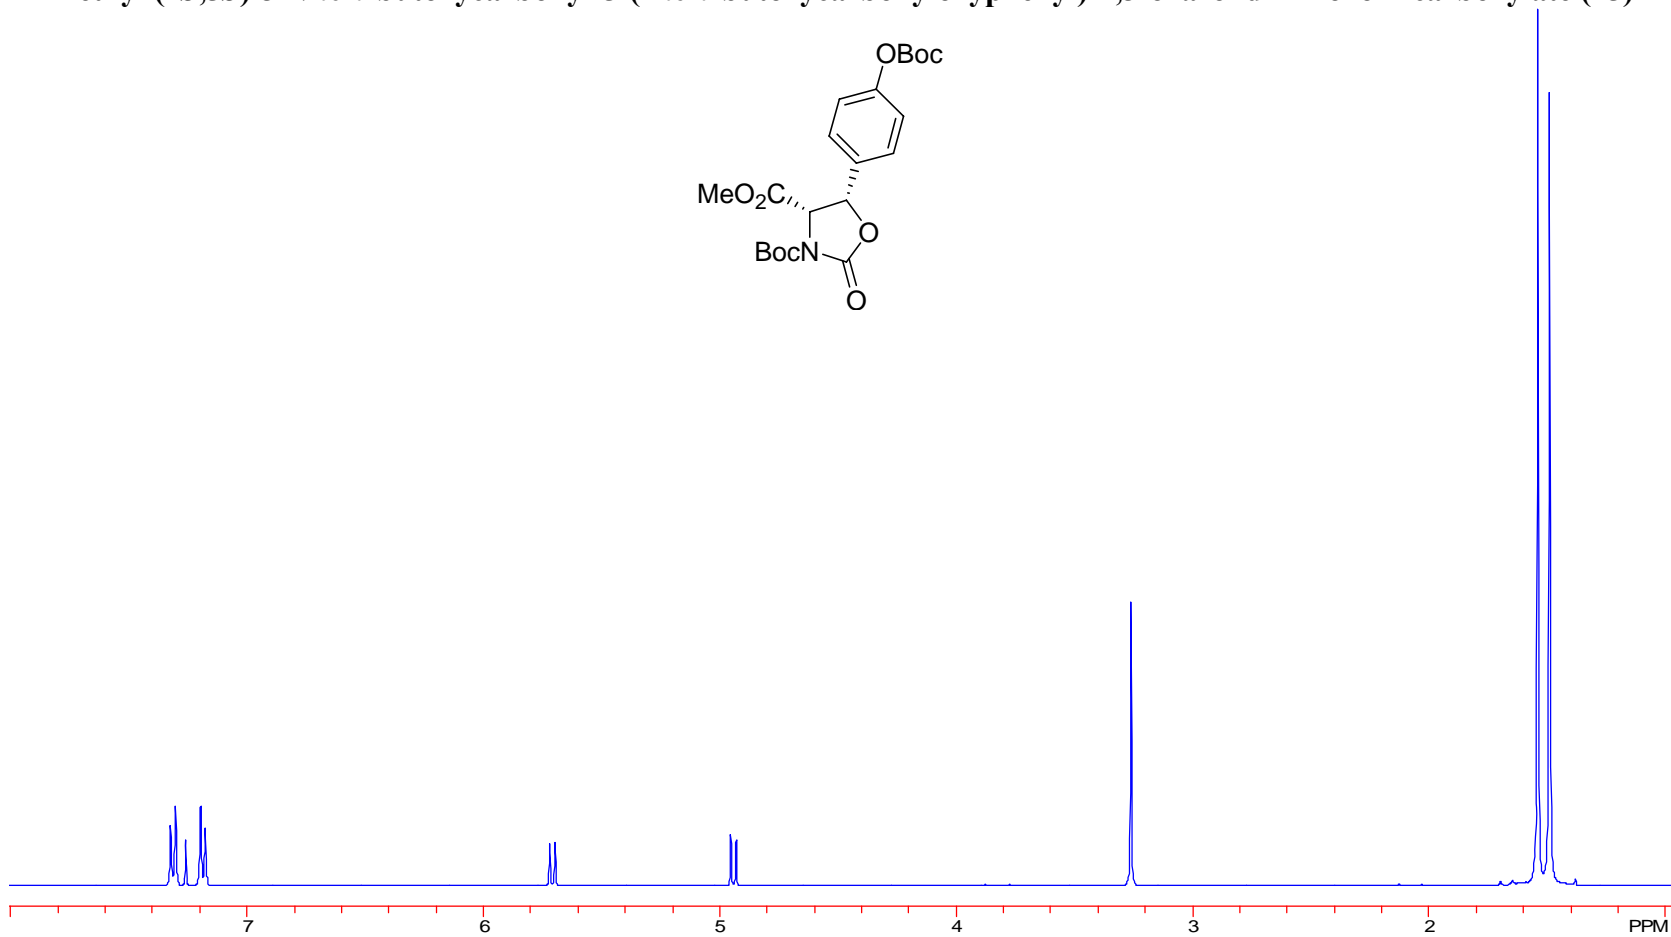

Methyl (4*S*,5*S*)-3-*N*-*tert*-butoxycarbonyl-5-(4-*tert*-butoxycarbonyloxyphenyl)-1,3-oxazolidin-2-oxo-4-carboxylate (15)

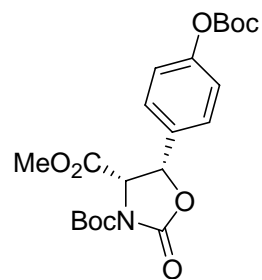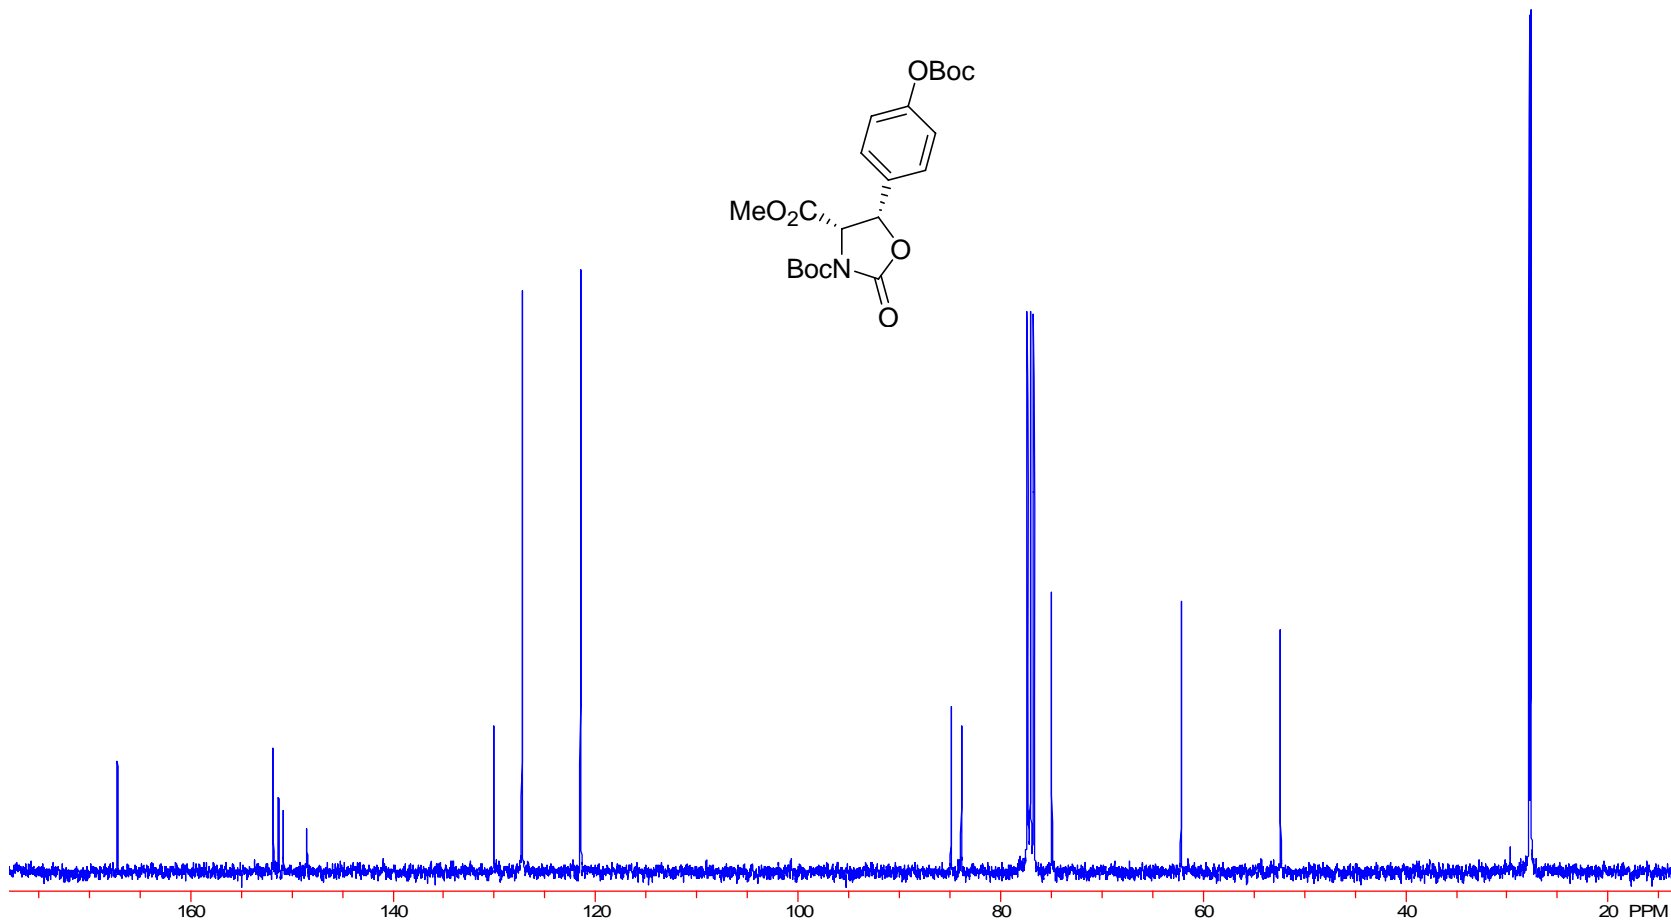

***N*-tert-Butoxycarbonyl-*O*-tert-butoxycarbonyl-(2*S*,3*R*)- $\beta$ -hydroxy-L-tyrosine methyl ester (16)**

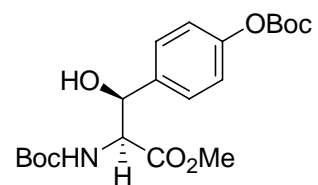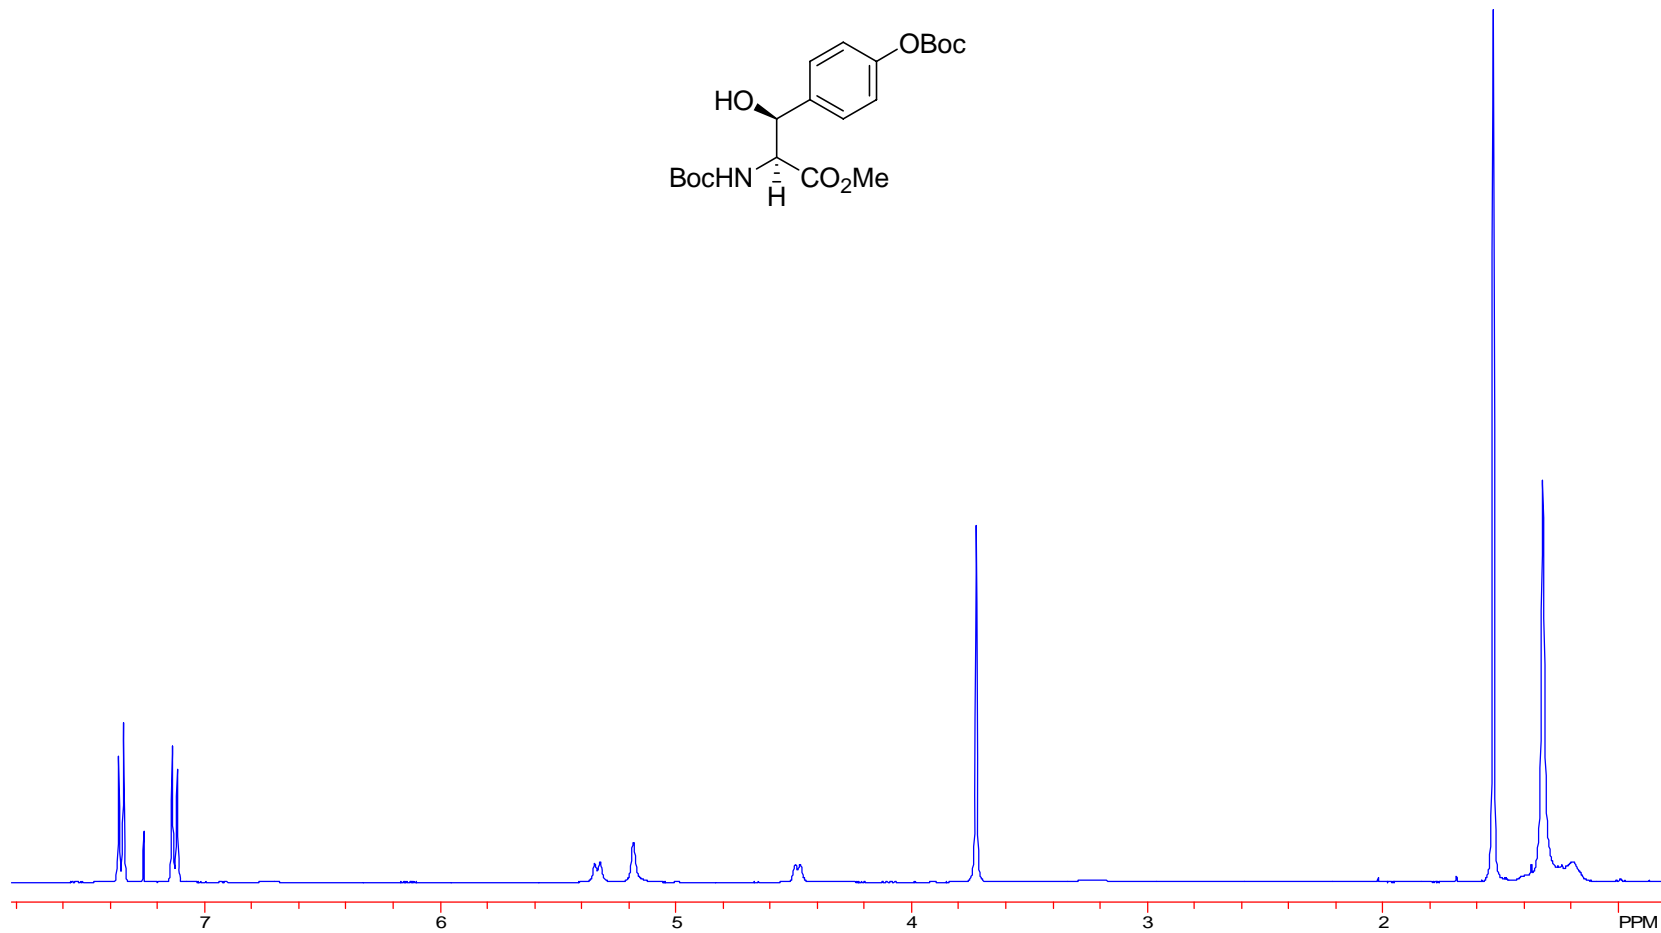

***N*-tert-Butoxycarbonyl-*O*-tert-butoxycarbonyl-(2*S*,3*R*)- $\beta$ -hydroxy-L-tyrosine methyl ester (16)**

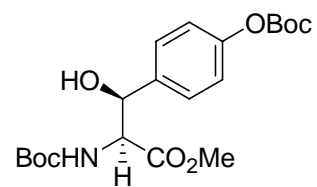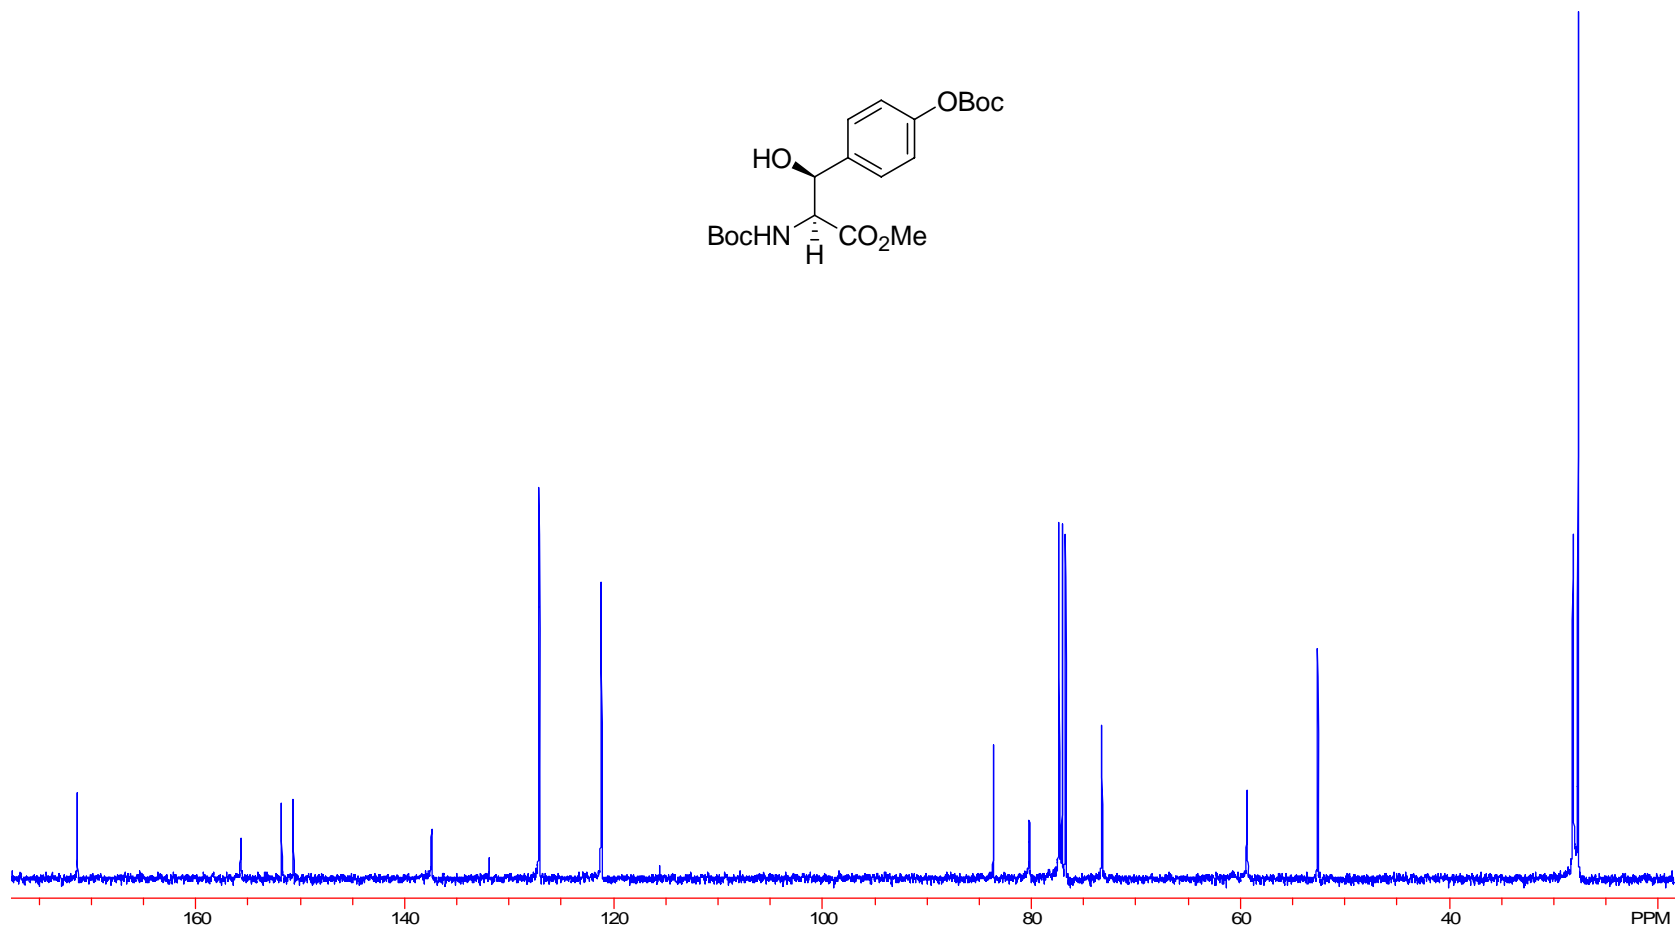



***N,N*-di-*tert*-Butoxycarbonyl-4-*N*<sup>im</sup>-*tert*-butoxycarbonyl-L-hystidine methyl ester (18)**

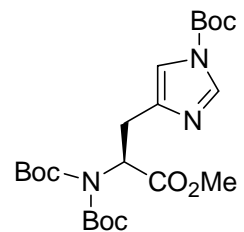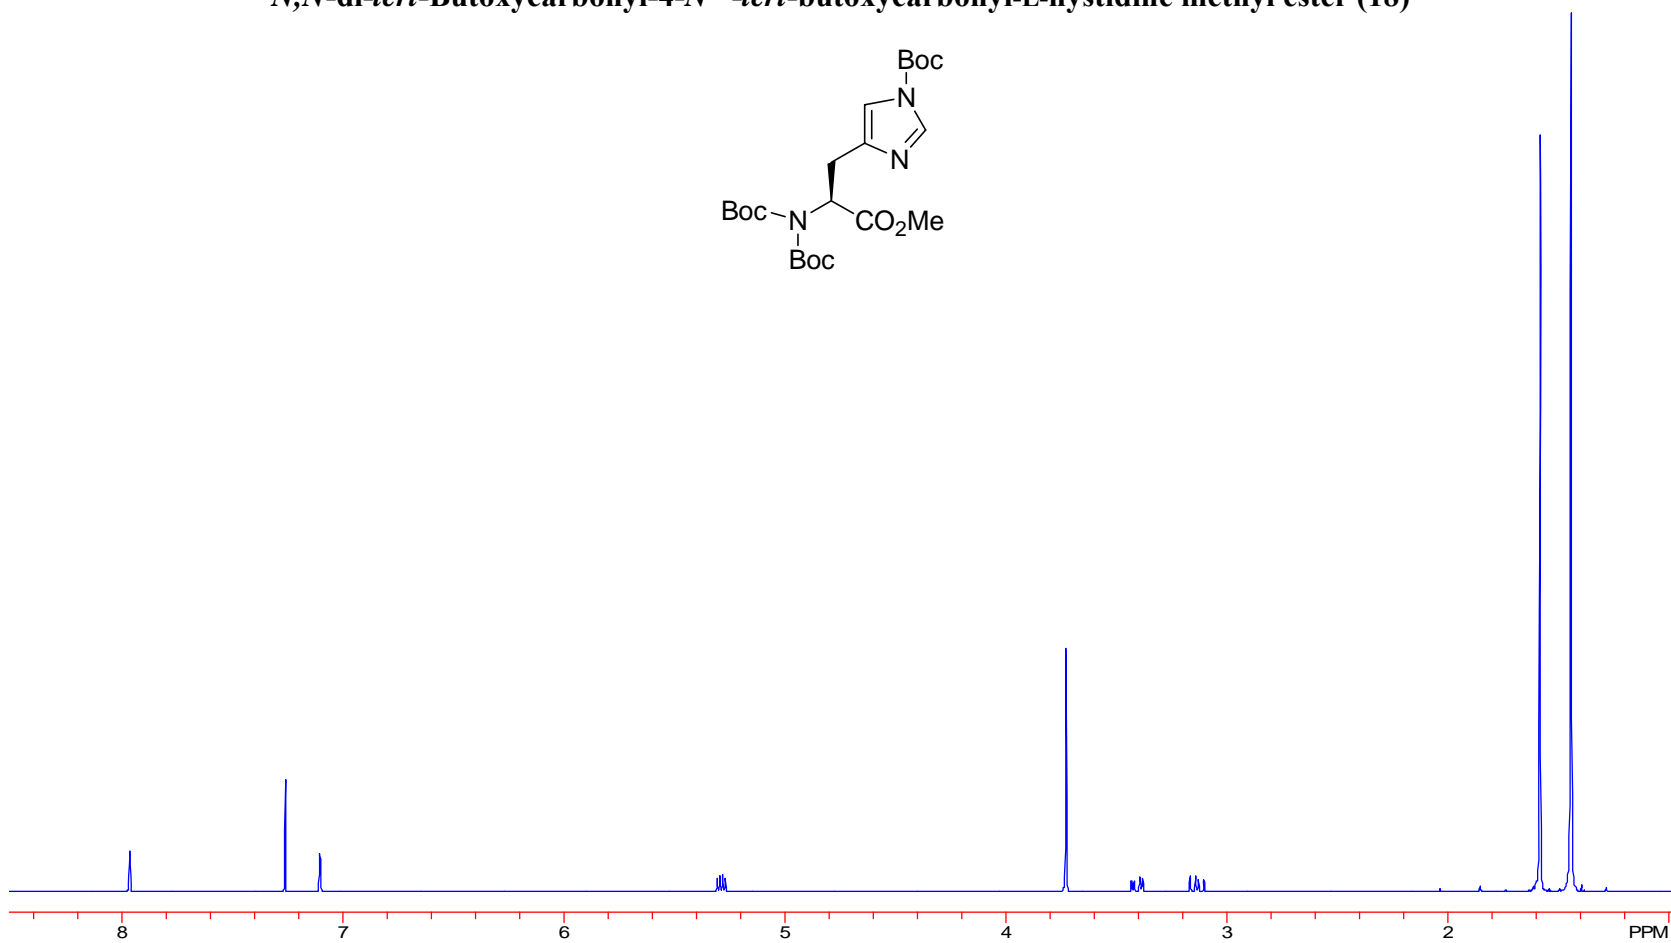

***N,N*-di-*tert*-Butoxycarbonyl-4-*N*<sup>im</sup>-*tert*-butoxycarbonyl-L-hystidine methyl ester (18)**

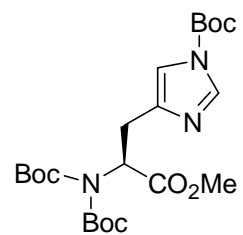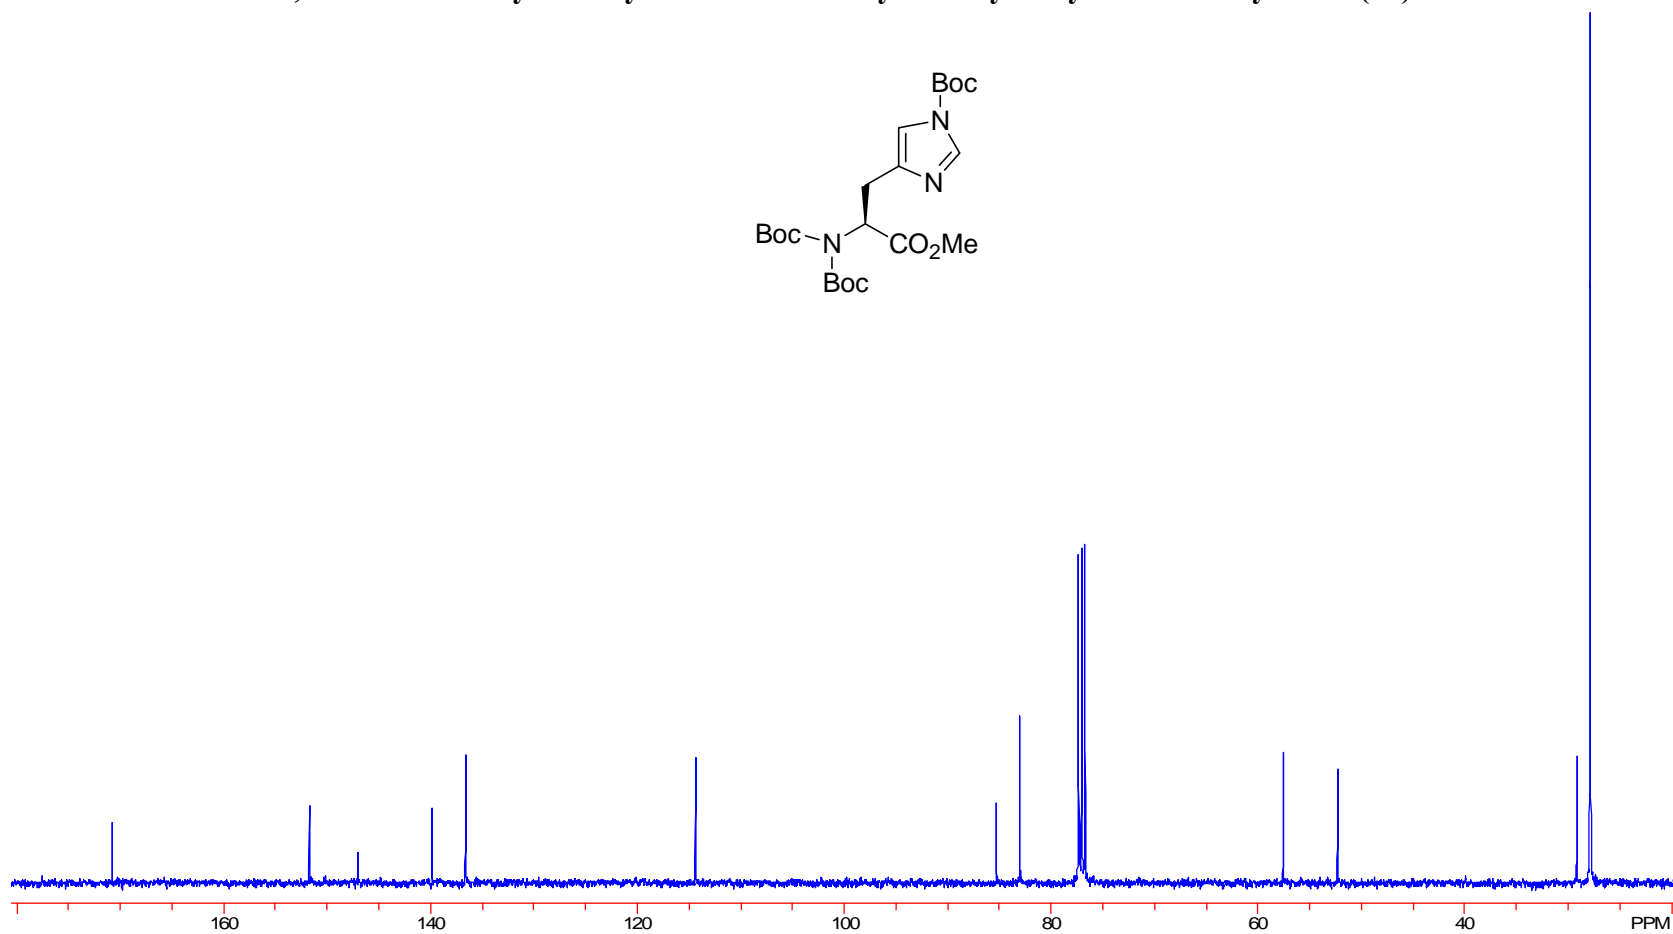

**Methyl (4*S*,5*S*)-3-*N*-*tert*-butoxycarbonyl-5-{4-*N*-(*tert*-butoxycarbonyl)imidazolyl}-1,3-oxazolidin-2-oxo-4-carboxylate (20)**

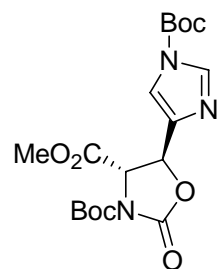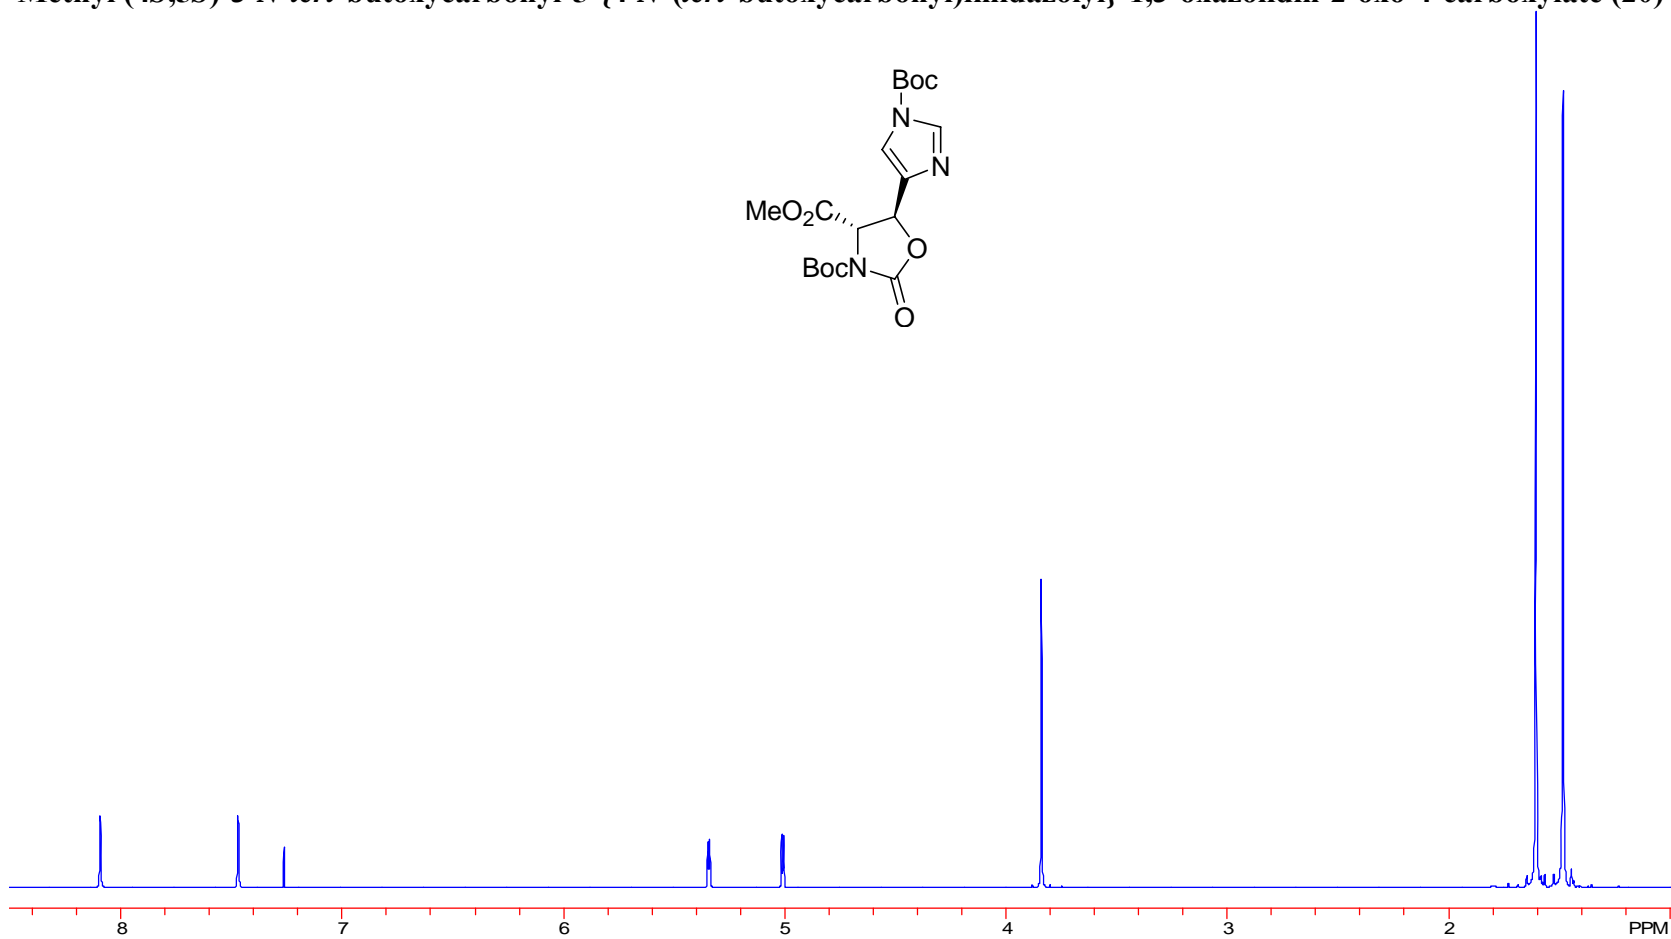

**Methyl (4*S*,5*S*)-3-*N*-*tert*-butoxycarbonyl-5-{4-*N*-(*tert*-butoxycarbonyl)imidazolyl}-1,3-oxazolidin-2-oxo-4-carboxylate (20)**

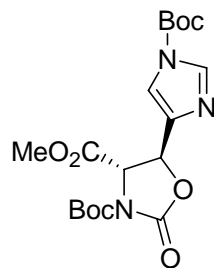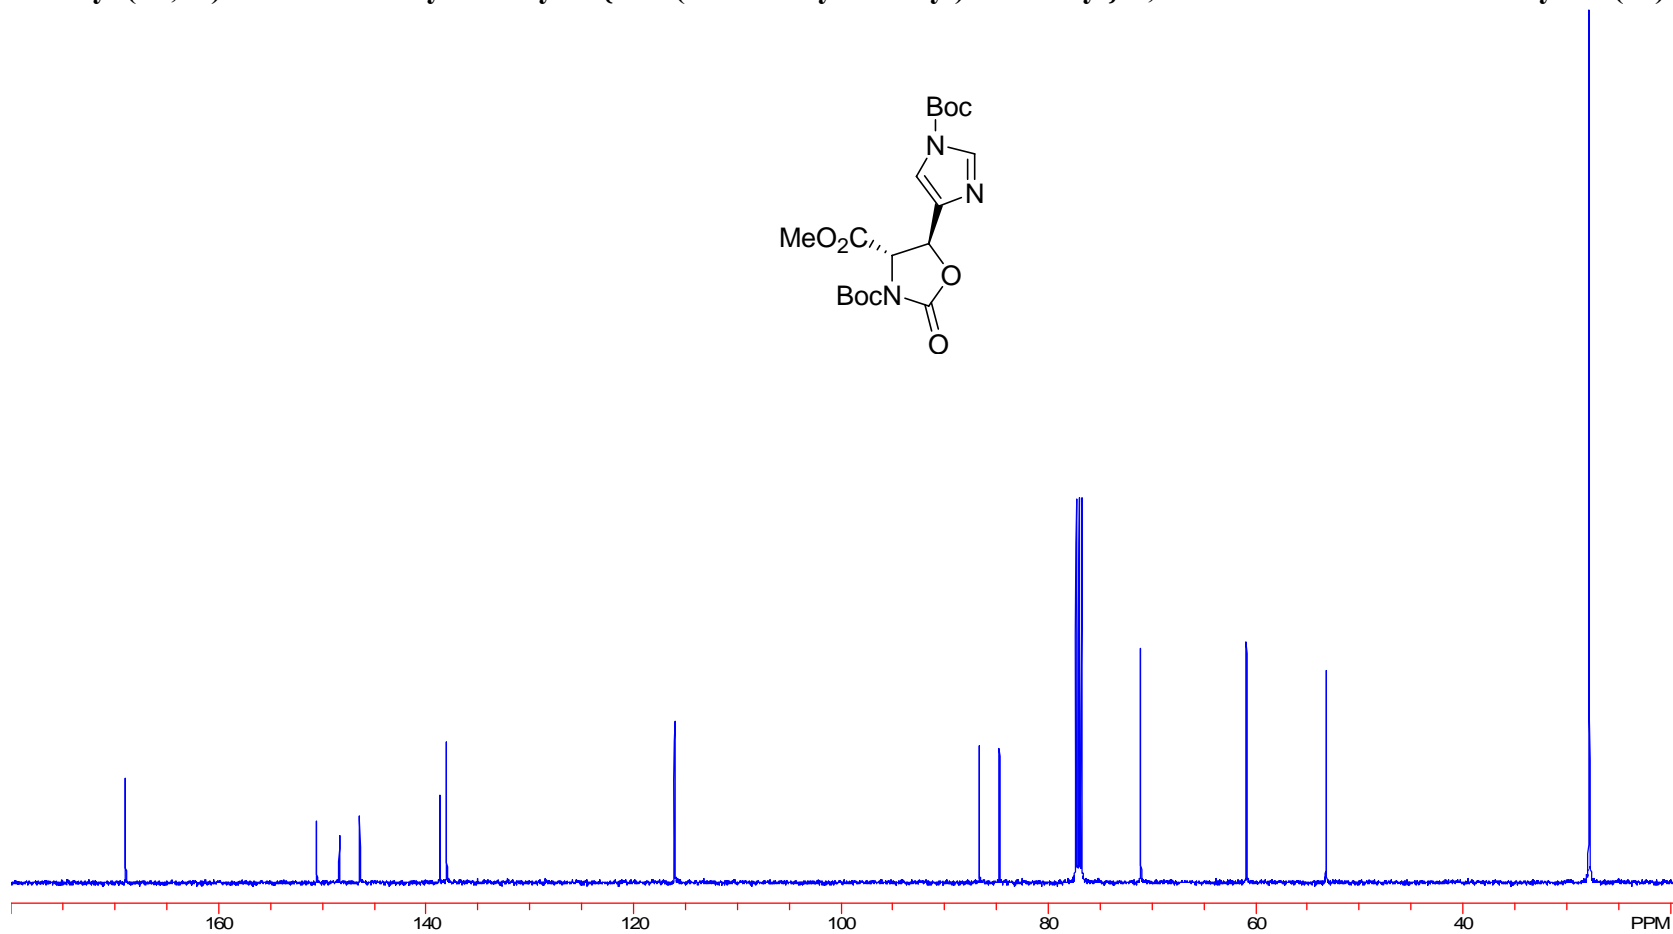

Methyl (4*S*,5*S*)-3-*N*-*tert*-butoxycarbonyl-5-imidazolyl-1,3-oxazolidin-2-oxo-4-carboxylate (21)

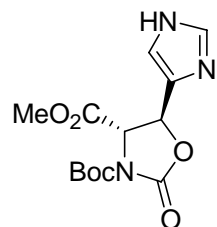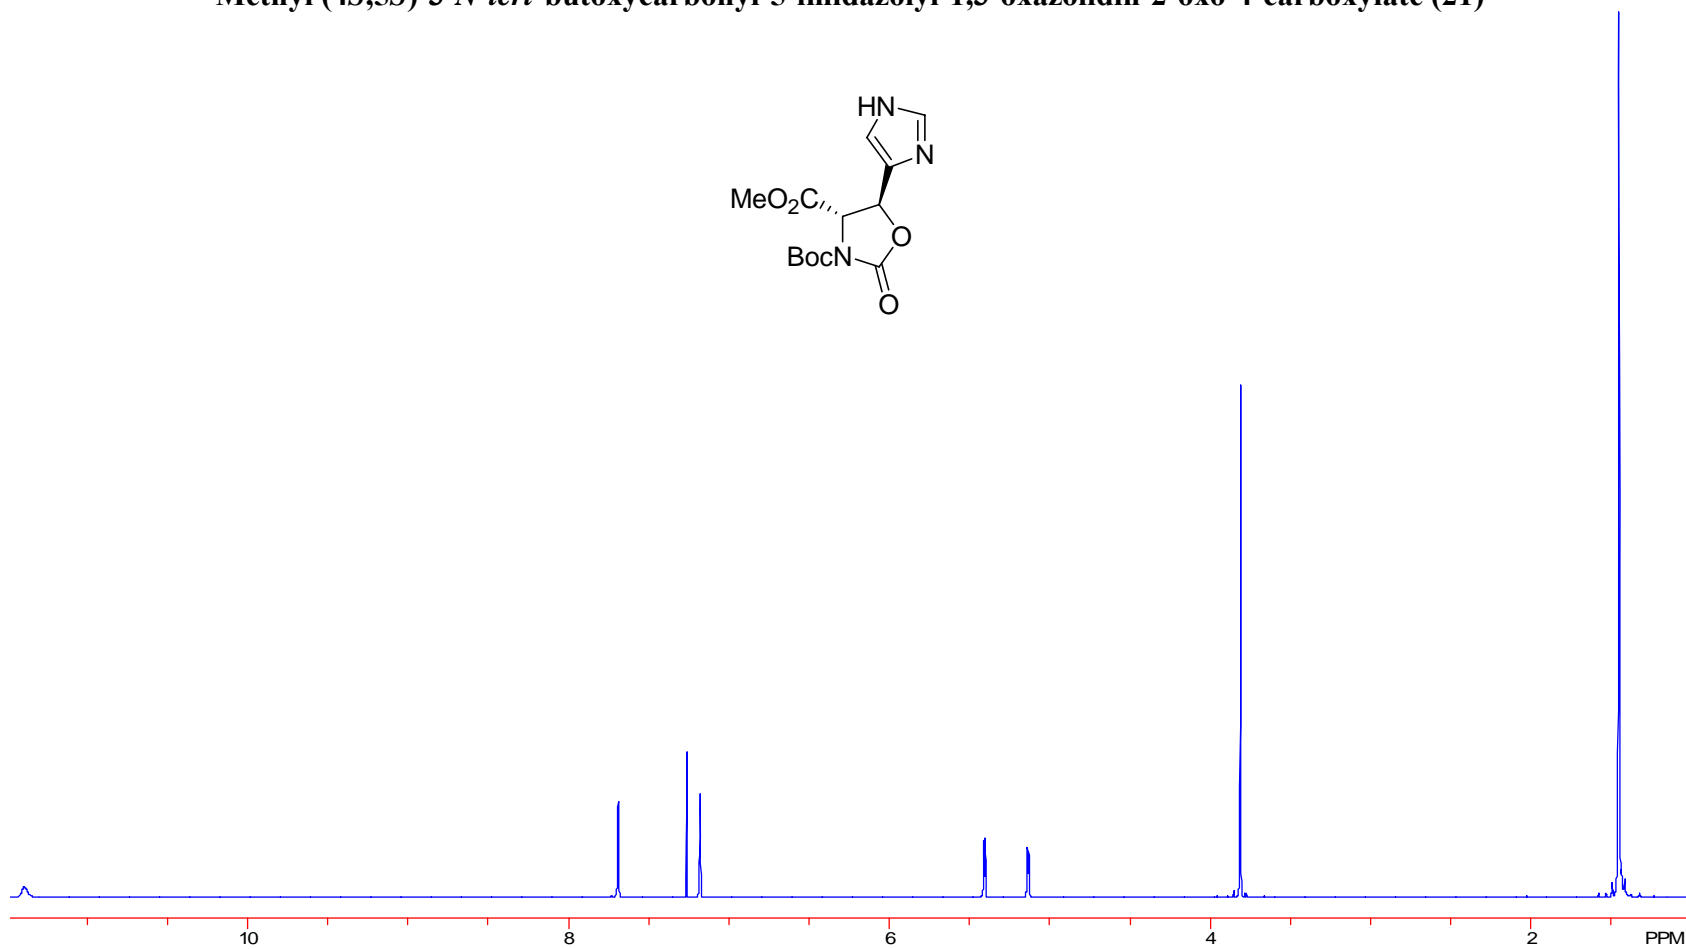

Methyl (4*S*,5*S*)-3-*N*-*tert*-butoxycarbonyl-5-imidazolyl-1,3-oxazolidin-2-oxo-4-carboxylate (21)

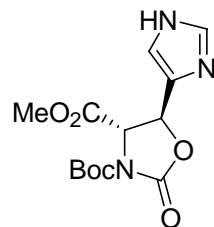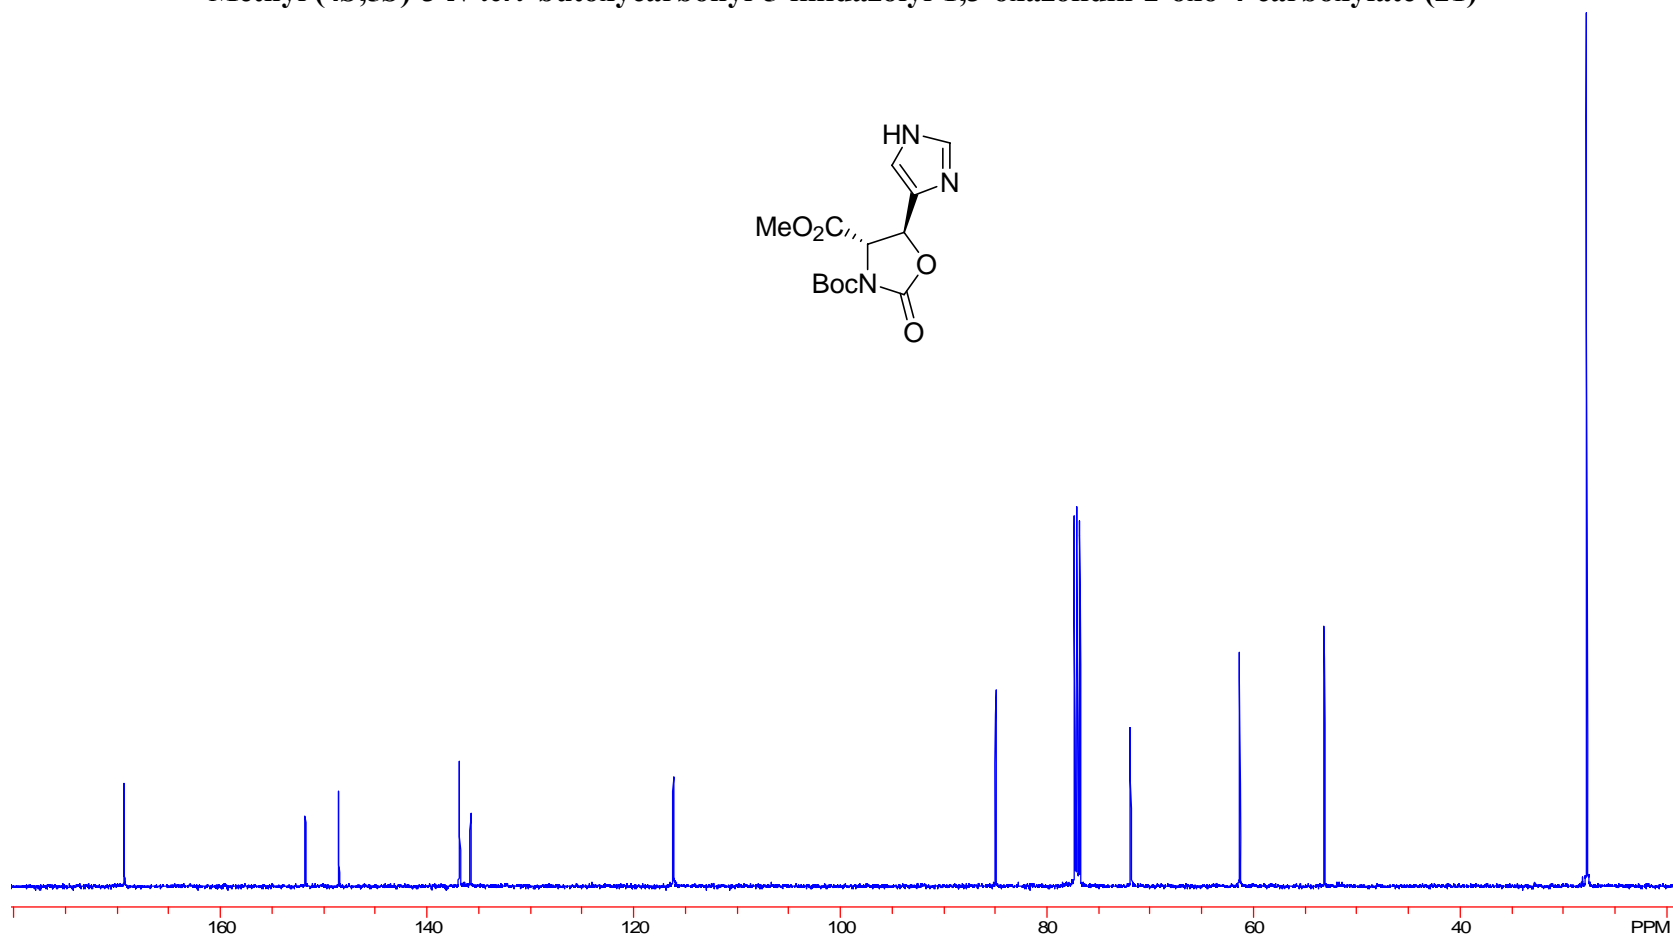

***N*-tert-Butoxycarbonyl-2,3-dihydro-L-hystidine methyl ester (22)**

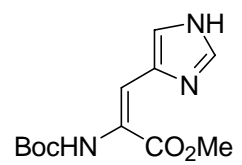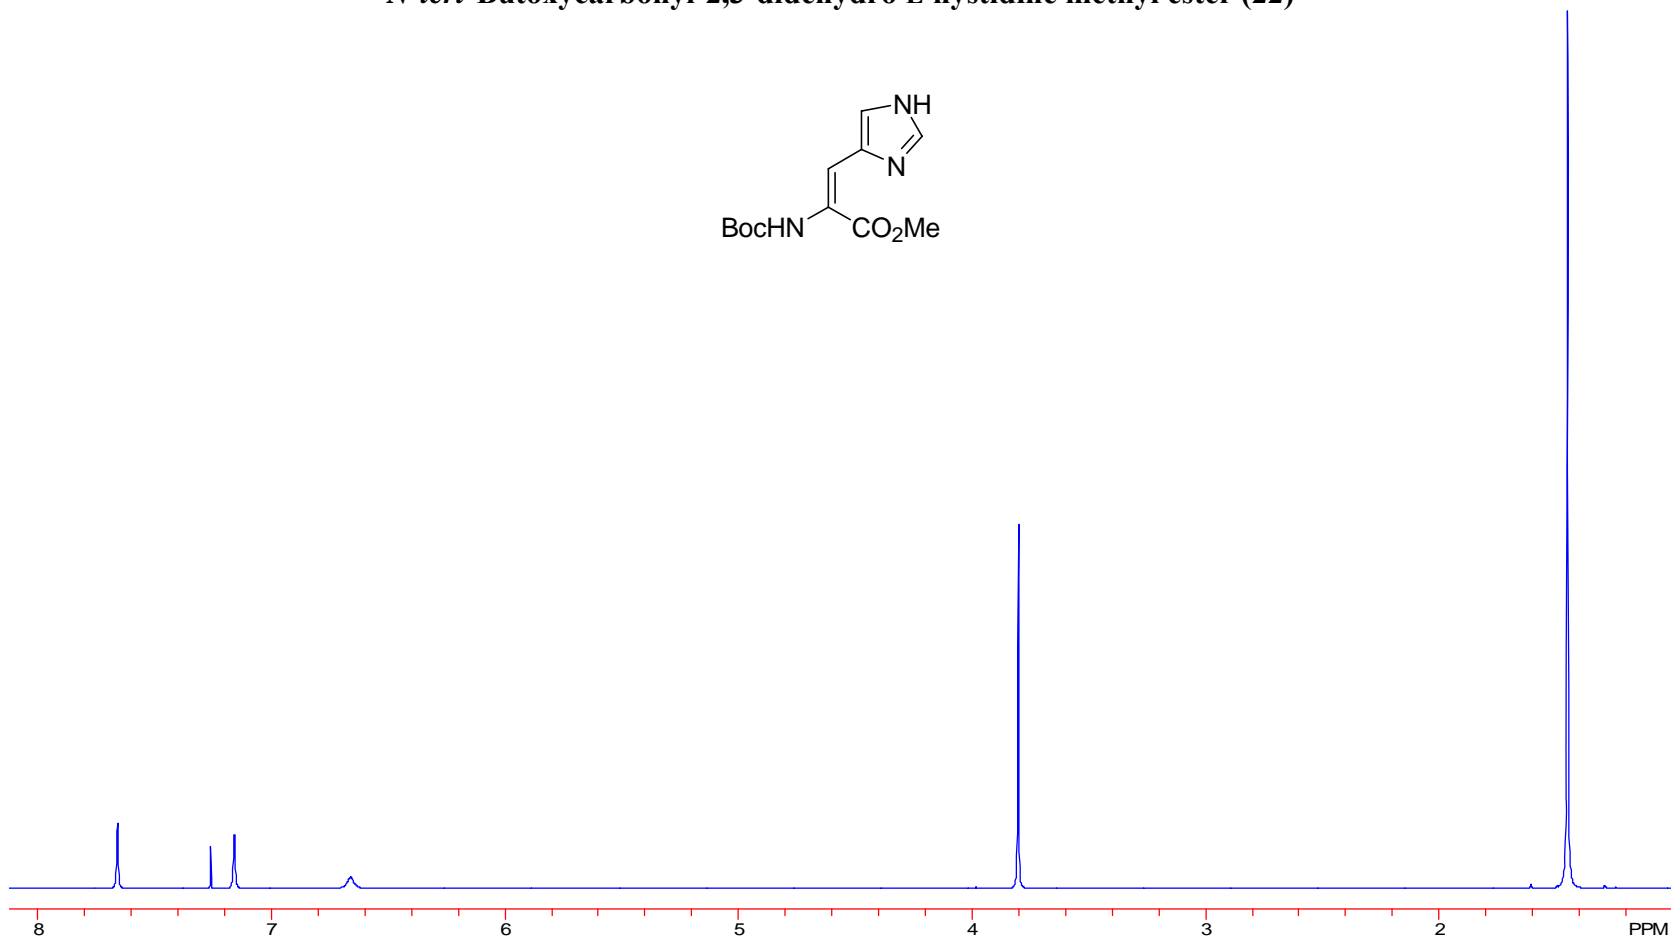

***N*-tert-Butoxycarbonyl-2,3-didehydro-L-hystidine methyl ester (22)**

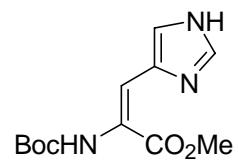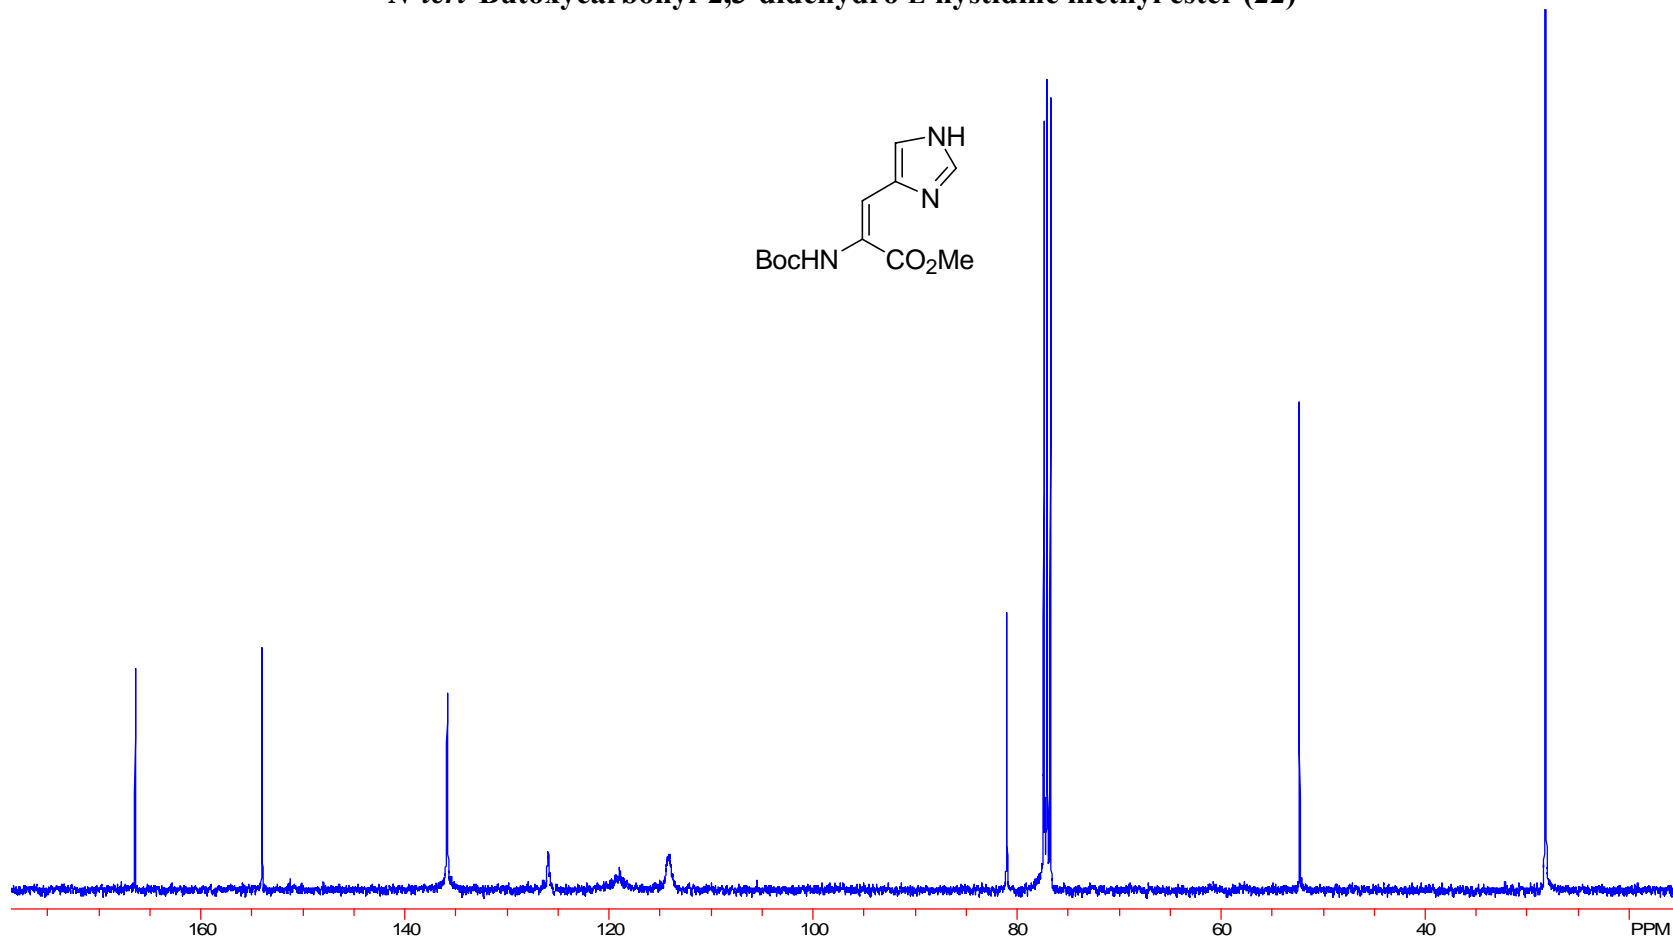



***N*-tert-Butoxycarbonyl-4-*N*<sup>im</sup>-triphenylmethyl-(2*S*,3*S*)- $\beta$ -hydroxy-L-hystidine methyl ester (23)**

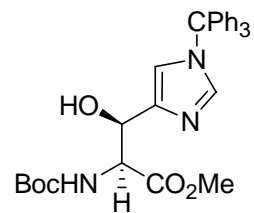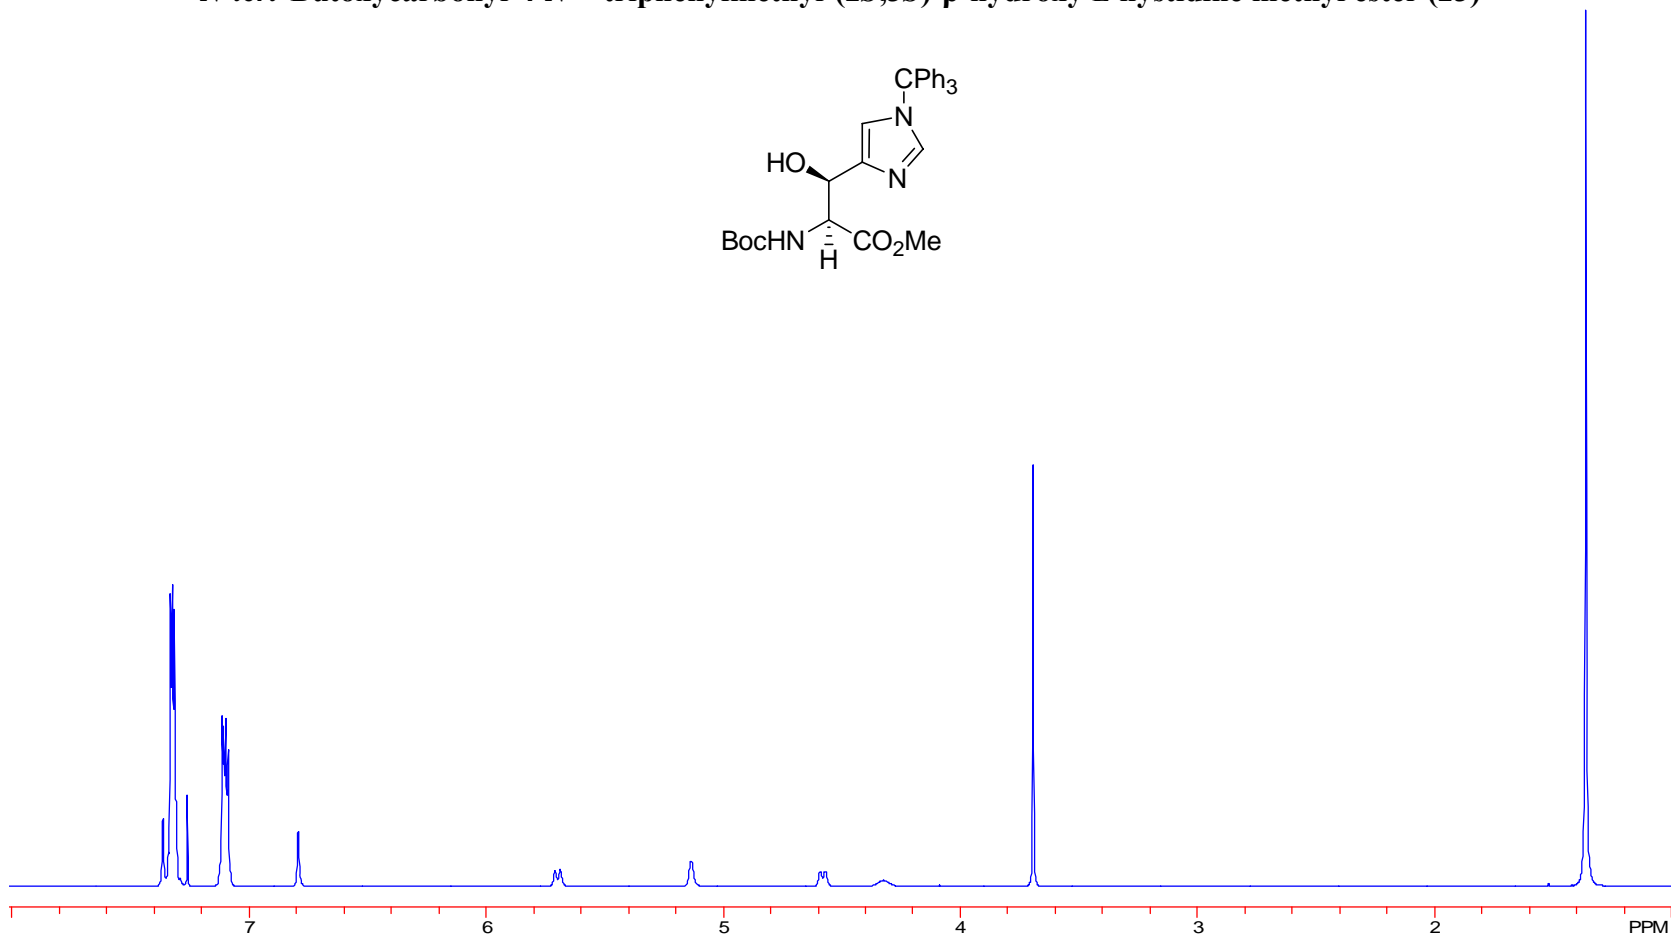

***N*-tert-Butoxycarbonyl-4-*N*<sup>im</sup>-triphenylmethyl-(2*S*,3*S*)- $\beta$ -hydroxy-L-hystidine methyl ester (23)**

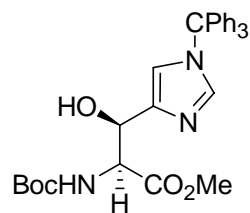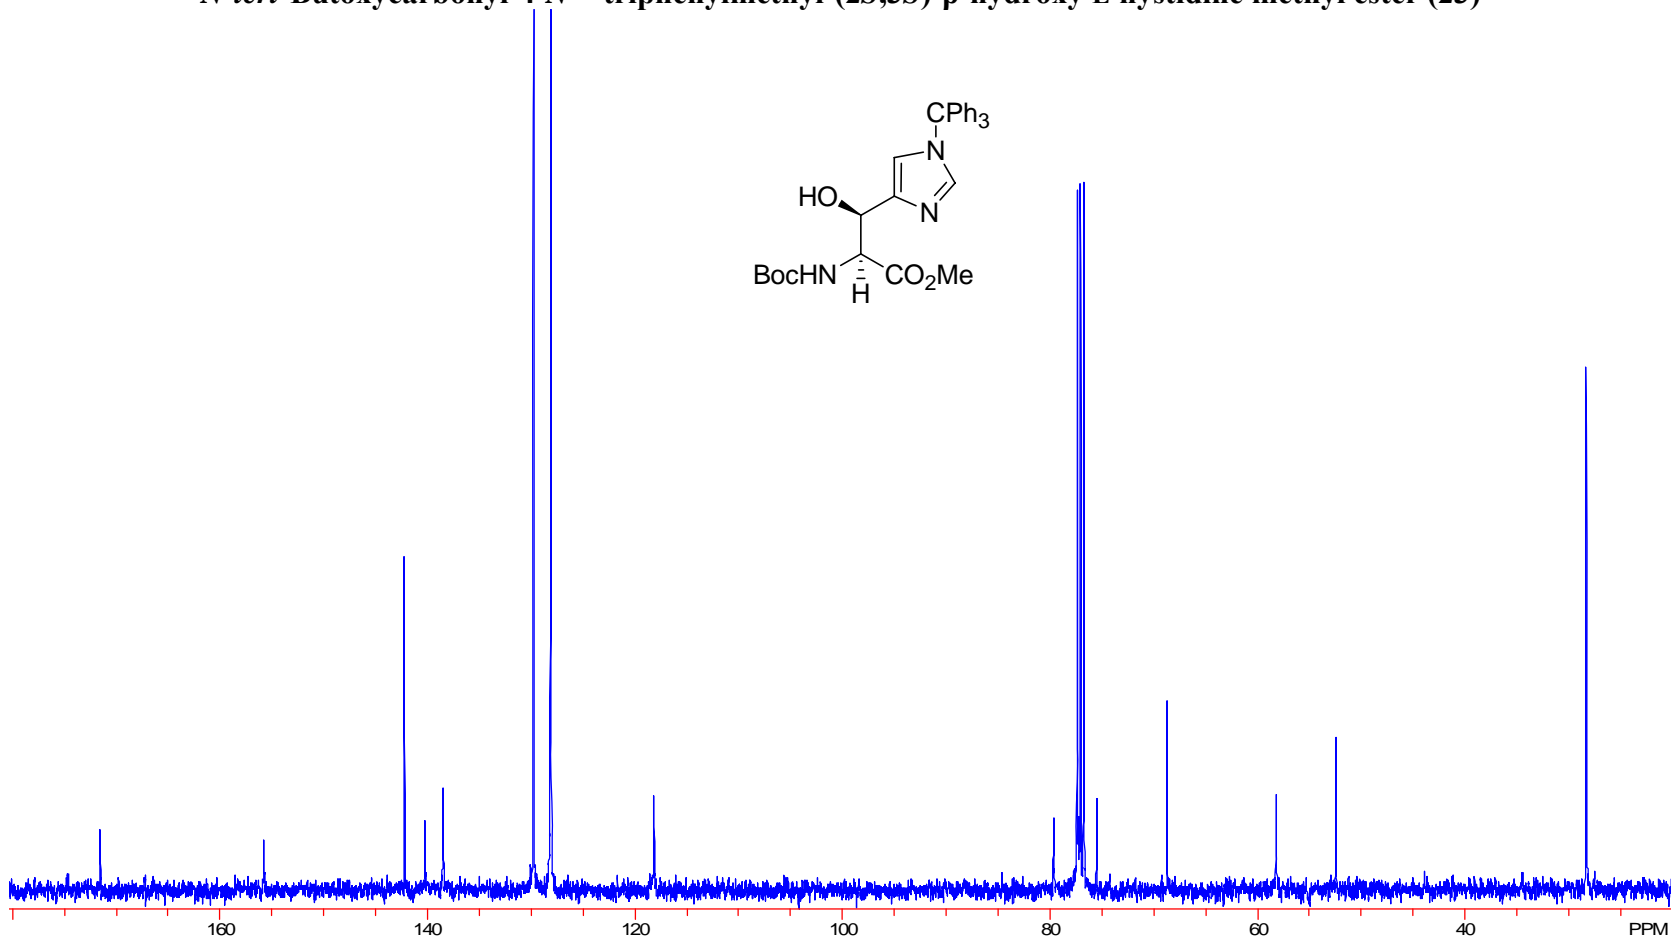

***N,N*-di-*tert*-Butoxycarbonyl-*N*<sup>in</sup>-*tert*-butoxycarbonyl-L-tryptophan methyl ester (25)**

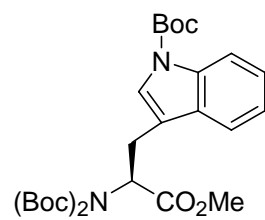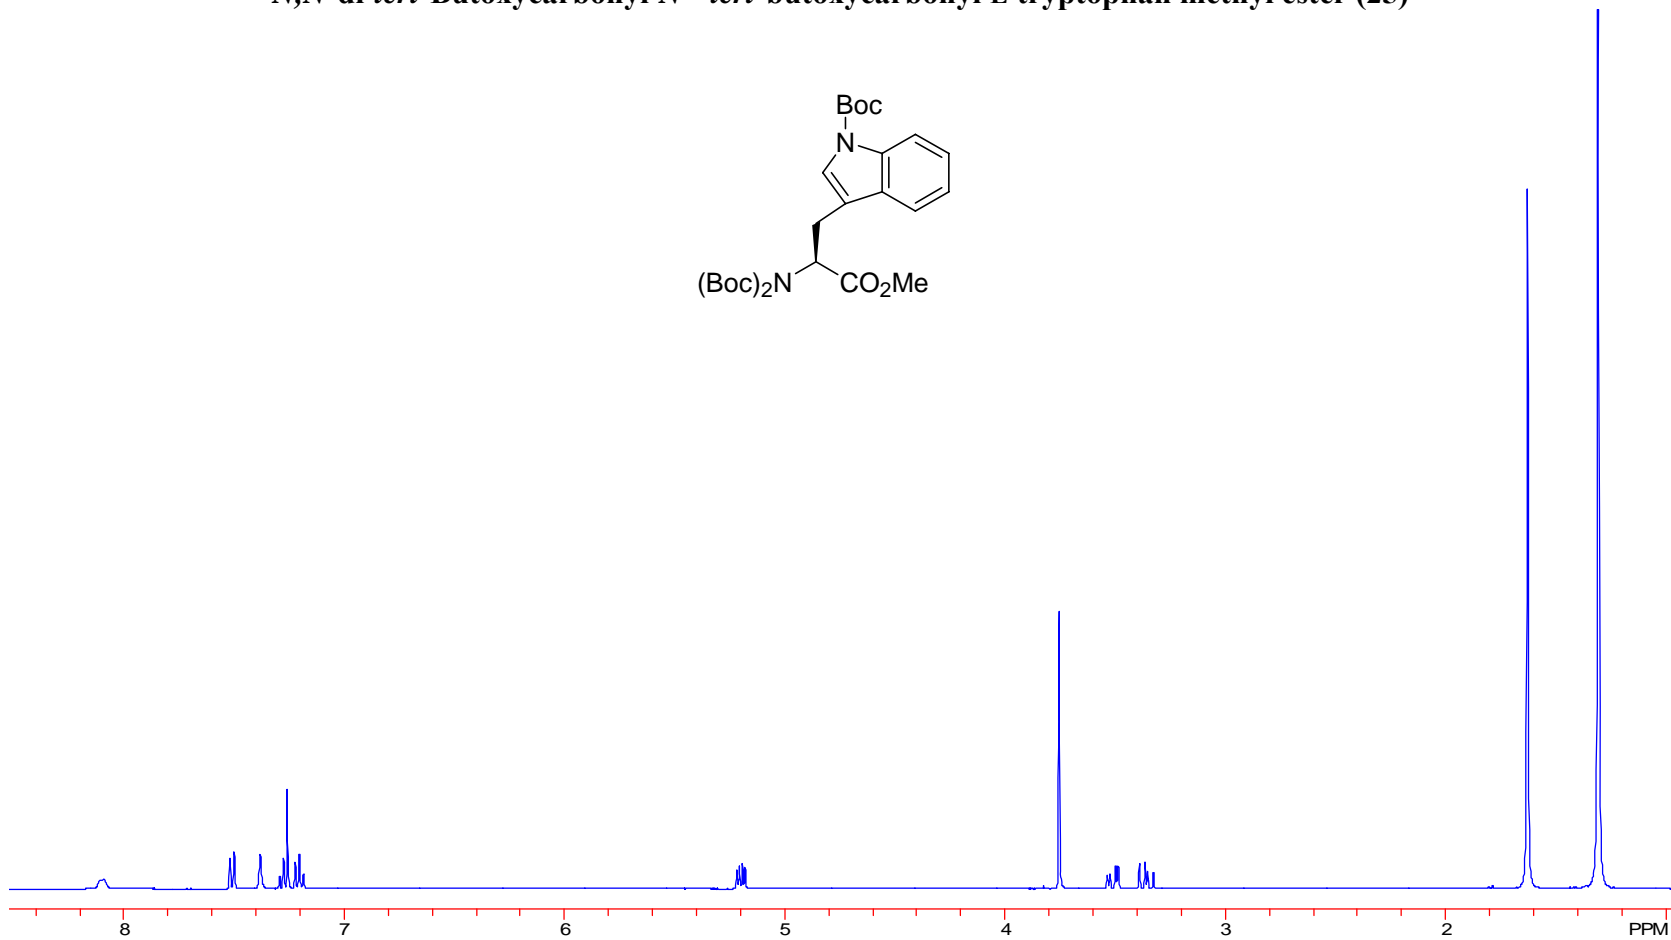

***N,N*-di-*tert*-Butoxycarbonyl-*N*<sup>in</sup>-*tert*-butoxycarbonyl-L-tryptophan methyl ester (25)**

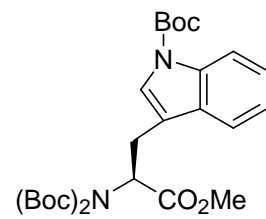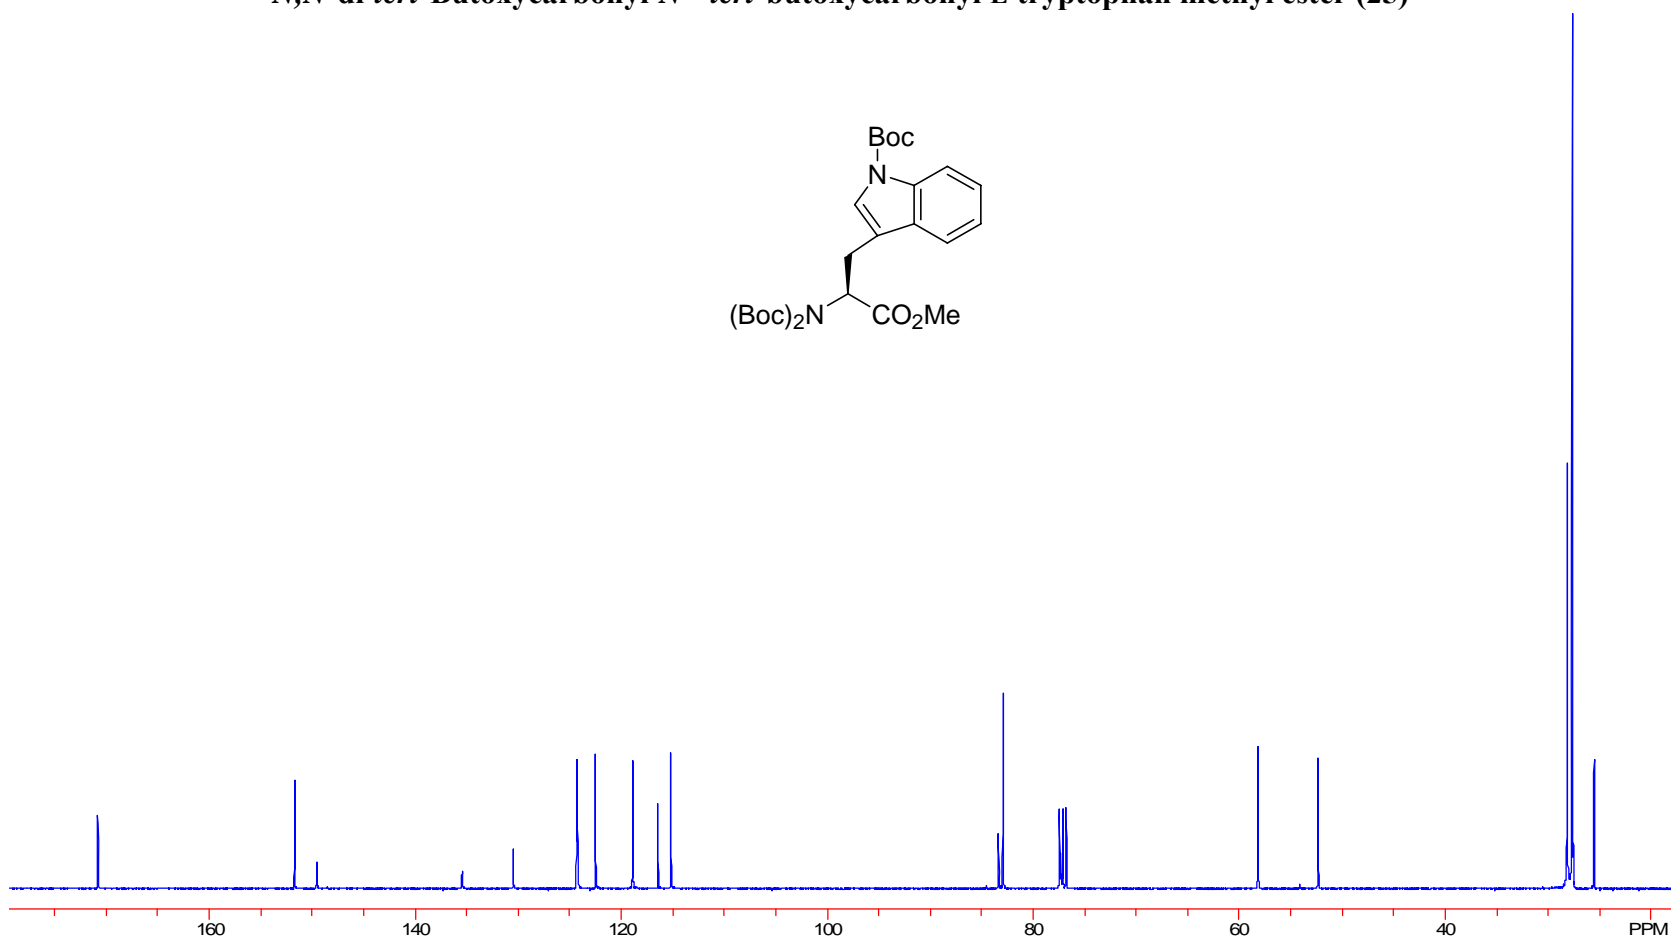



**Methyl (4*S*,5*S*)-3-*N*-*tert*-butoxycarbonyl-5-{*N*-(*tert*-butoxycarbonyl)indolyl}-1,3-oxazolidin-2-oxo-4-carboxylate (26)**

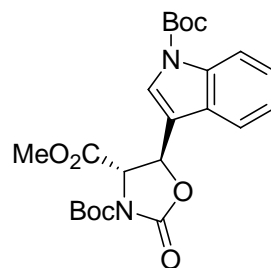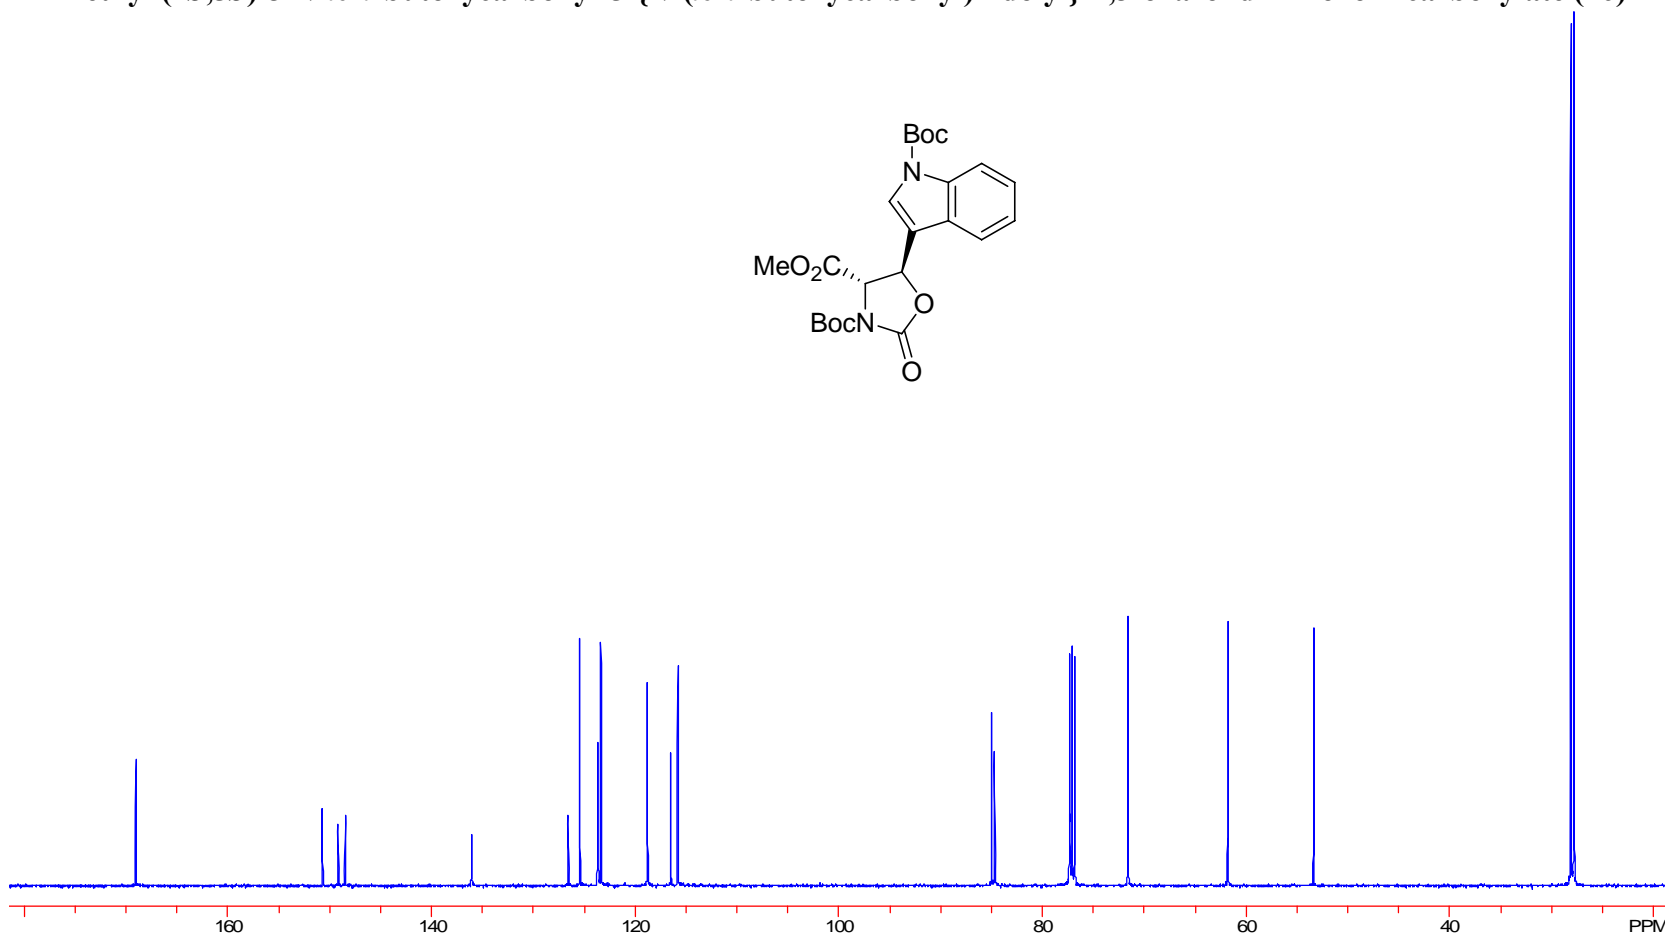

***N*-tert-Butoxycarbonyl-*N*<sup>in</sup>-tert-butoxycarbonyl-(2*S*,3*S*)-β-hydroxy-L-tryptophan methyl ester (27)**

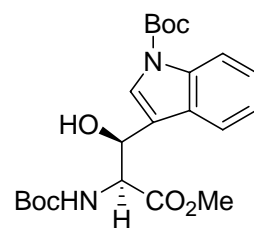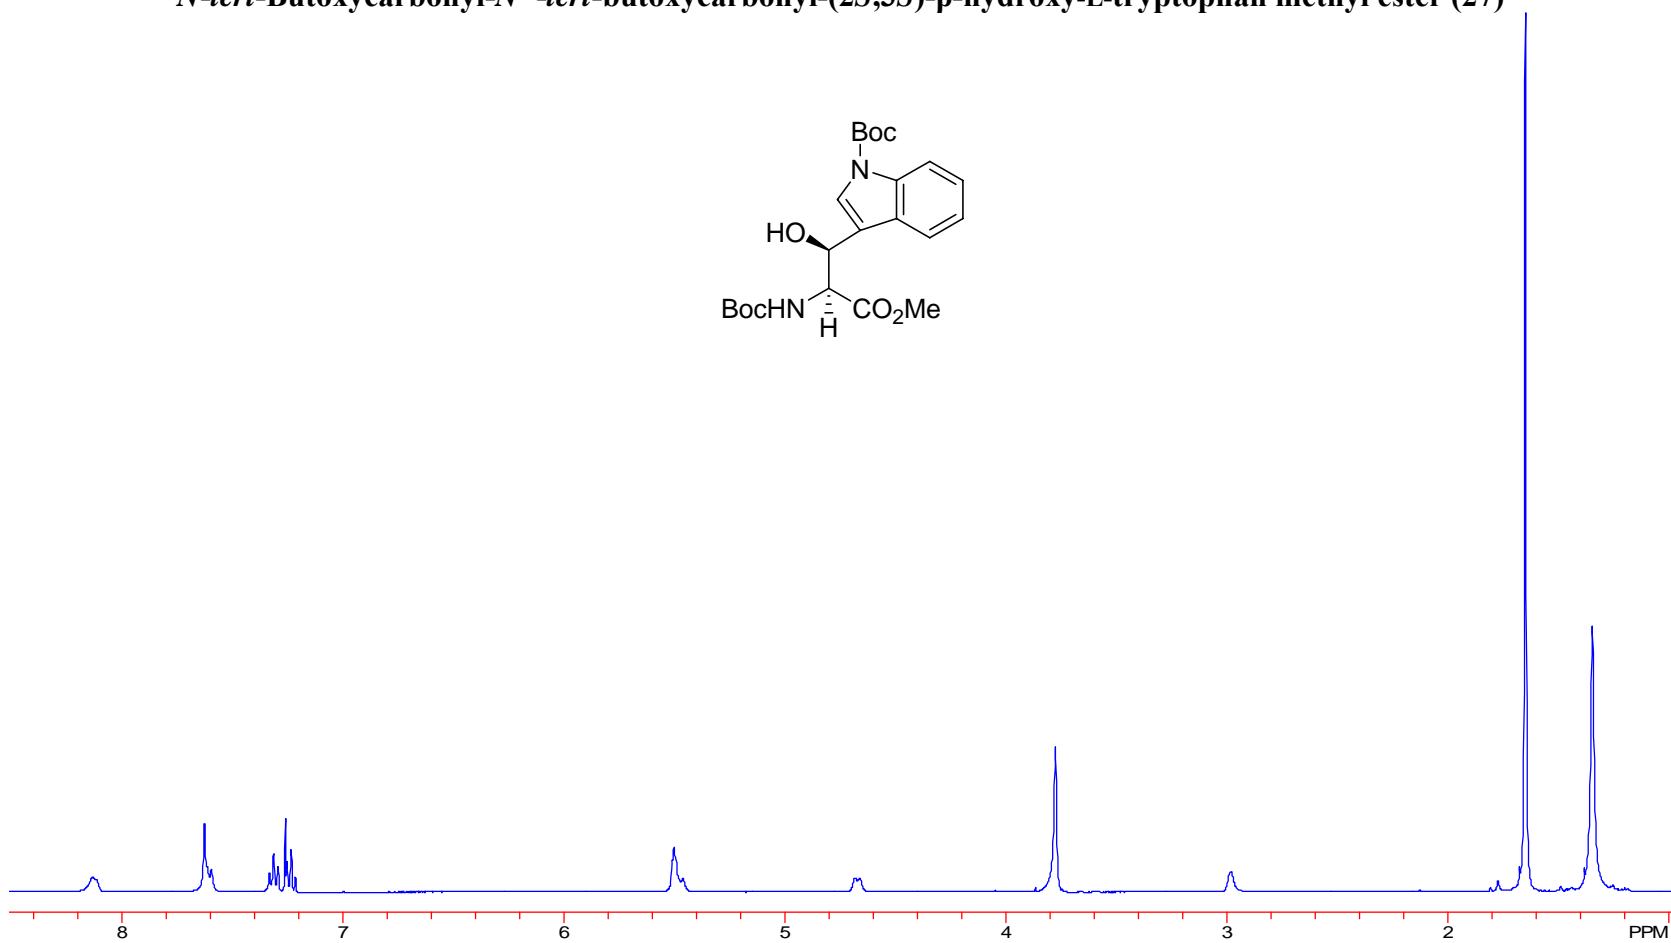

***N*-tert-Butoxycarbonyl-*N*<sup>in</sup>-tert-butoxycarbonyl-(2*S*,3*S*)-β-hydroxy-L-tryptophan methyl ester (27)**

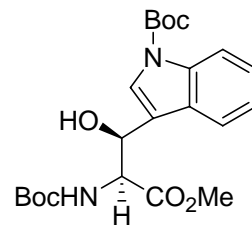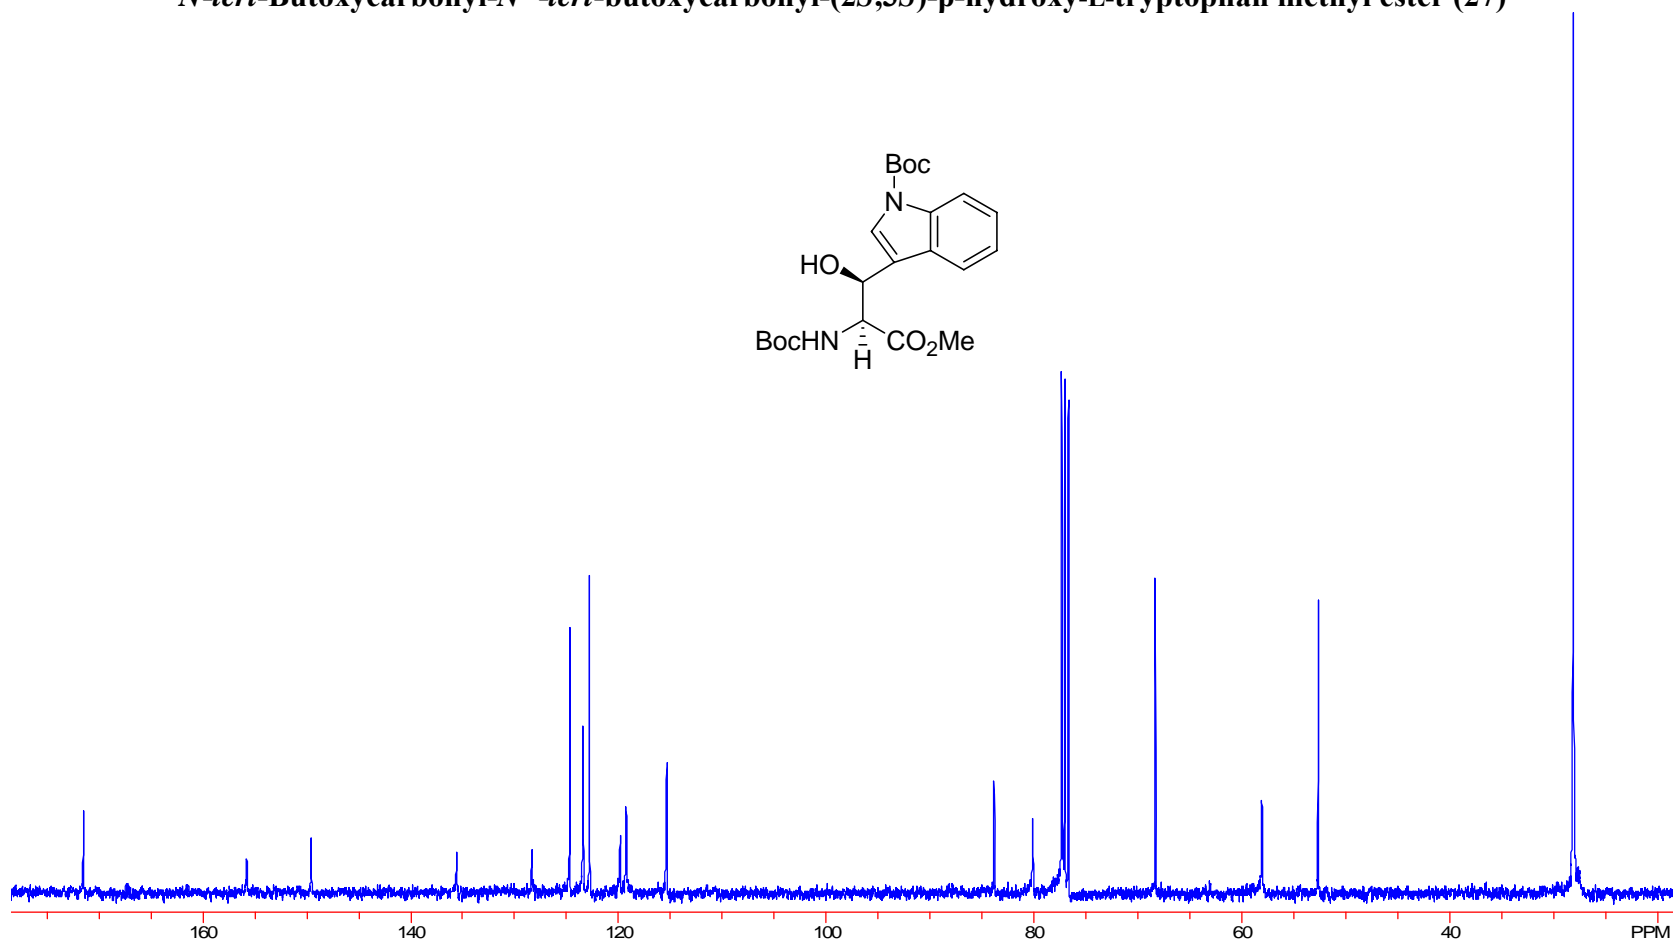

Supplement: NIHMS61233-supplement-si20060630_023.pdf [file NIHMS61233-supplement-si20060630_023.pdf]
